# Supplementary material
Source: publisher figshare collection journal article supplement (https://acs.figshare.com/ndownloader/files/38946401)
Supplement: Supplementary file 1 [file 38946401]

## **Supporting Information**

### Integrating Bifunctionality and Chemical Stability in Covalent Organic Frameworks via One-Pot Multicomponent Reactions for Solar-Driven H<sub>2</sub>O<sub>2</sub> Production

Prasenjit Das,<sup>†</sup> Gouri Chakraborty,<sup>#</sup> Jérôme Roeser,<sup>†</sup> Sarah Vogl,<sup>†</sup> Jabor Rabeah,<sup>‡</sup> Arne Thomas<sup>\*,†</sup>

*<sup>†</sup>Department of Chemistry/Functional Materials, Technische Universität Berlin  
Hardenbergstraße 40, 10623 Berlin, Germany*

*<sup>#</sup>BAM Federal Institute for Materials Research and Testing, Richard-Willstätter-Str. 11,  
12489 Berlin, Germany*

*<sup>‡</sup>Leibniz-Institut für Katalyse e.V. an der Universität Rostock, Albert-Einstein-Str. 29a,  
18059 Rostock, Germany*

**E-mail:** *arne.thomas@tu-berlin.de*

# Table of Contents

| Section | Description                                                                                       | Page No      |
|---------|---------------------------------------------------------------------------------------------------|--------------|
| S1      | General Methods and Materials                                                                     | S-3 to S-4   |
| S2      | Synthesis and Characterization of Model Compound and COFs (Scheme S1-S4, Figures S1-S6, Table S1) | S-5 to S-12  |
| S3      | Structural Modelling and Atomic Coordinates of COFs (Figures S7-S15, Tables S2-S4)                | S-13 to S-21 |
| S4      | FESEM and HRTEM Images, Surface area and TGA of COFs (Figures S16-S26)                            | S-22 to S-28 |
| S5      | UV-vis Spectra and Band Structure of COFs (Figures S27-S29)                                       | S-29 to S-31 |
| S6      | Photocatalytic Experiments (Figures S30-S36)                                                      | S-32 to S-37 |
| S7      | Configurational Bias Monte Carlo Simulation (Figures S37-S40)                                     | S-38 to S-42 |
| S9      | Photocatalytic Experiments and Mechanism (Figures S41-S49)                                        | S-43 to S-49 |
| S10     | Synthesis and Characterization of <b>DMCR-2</b> and <b>DMCR-3</b> (Scheme S5-S6, Figures S50-S59) | S-51 to S-58 |
| S11     | Comparison of H <sub>2</sub> O <sub>2</sub> Production (Table S5) and References                  | S-59-S-61    |

## Section S1. General Methods and Materials

**Materials.** All purchased chemicals were used without further purification except where otherwise noted. *o*-DCB (1,2-Dichlorobenzene, 99%) anhydrous *n*-BuOH (*n*-Butanol, 99%), benzyl alcohol (BA), *t*-butyl alcohol (TBA), benzyl amine and styrene were purchased from Sigma Aldrich Chemicals. Tta (2,4,6-Tris(4-aminophenyl)triazine, 95%), Tpa-CHO (1,3,5-Tris(4-formylphenyl)triazine, >96.0%), Pyruvic acid were all supplied by TCI. Acetic acid (>99.0%), methanol (MeOH), Isopropanol (IPA), Ethanol (EtOH), were purchased from Carl Roth.

**X-ray Powder Diffraction** patterns was collected on a Bruker D8 Advance diffractometer in reflection geometry operating with a Cu K $\alpha$  anode ( $\lambda = 1.54178 \text{ \AA}$ ) operating at 40 kV and 40 mA. Samples were ground and mounted as loose powders onto a Si sample holder. PXRD patterns were collected from 2 to 60  $2\theta$  degrees with a step size of 0.02 degrees and an exposure time of 2 seconds per step.

**$^1\text{H}$  NMR Spectra** for the samples dissolved in suitable solvents were carried on Bruker Avance II 400.  $^{13}\text{C}$  Solid state NMR (cross polarization magic-angle spinning (CP/MAS)) spectra were carried out on a Bruker Avance 400 MHz spectrometer operating at 100.6 MHz.

**Thermogravimetric Analyses (TGA)** were performed using a TGA Q500 thermal analysis system under a  $\text{N}_2$  atmosphere from room temperature to 800  $^\circ\text{C}$  at a ramping rate of 1  $^\circ\text{C}/\text{min}$ .

**Attenuated Total Reflectance Fourier-Transform Infrared Spectrometry (ATR-FT-IR)** was conducted using a PerkinElmer Spectrum Two spectrometer with diamond/ZnSe ATR accessory. All spectra were collected using a LiTaO $_3$  MIR detector over a range of 450 to 4000  $\text{cm}^{-1}$ . All spectra were processed using Spectrum 10 software.

**High Resolution-Mass Spectrometry (HR-MS)** analyses were performed on a Shimadzu HRMS-2020 instrument using a 30-minute running time acetonitrile at a constant flow rate of 0.2 mL/min without passing through a column.

**Solid-State Diffuse Reflectance Ultraviolet–Visible (UV-vis) Spectra** of the pristine COF powders and starting monomers have been collected on Varian Cary 300 UV-vis Spectrophotometer.

**X-ray Photoelectron Spectroscopy (XPS)** was measured on a K-Alpha™ + X-ray Photoelectron Spectrometer System (Thermo Scientific) with Hemispheric 180 ° dual-focus analyzer with 128-channel detector. The X-ray monochromator used micro focused Al-K $\alpha$  radiation. For the measurement, the powder samples were pressed and loaded on carbon tape, then pasted onto the sample holder for measurement. The data was collected with an X-ray spot size of 400  $\mu$ m, 20 scans for the survey, and 50 scans for the regions.

**Field Emission Scanning Electron Microscopy (FESEM)** was measured on a ZEISS GeminiSEM500. All the COF materials were observed directly without gold coating in nanoVP mode.

**High Resolution Transmission Electron Microscopy (HRTEM)** was measured on a JEOL G-ARM STEM (JEM ARM300F2). All the COF samples were prepared on a carbon grid after suspension in a EtOH-acetonitrile mixture.

**Nitrogen Sorption Measurements** were performed at 77 K using an Autosorb-iQ-MP from Quantachrome. Prior to the analysis the samples were dried and degassed at 100 °C for 12 h.

**HOMO-LUMO** energy was calculated using DFT method with basis set B3LYP/6-31G+(d)).

## Section S2. Synthesis and Characterization of Model Compound and COFs

### Synthesis of Model Compound

A round-bottomed flask (25 mL) was charged with 3,4-dimethoxyaniline (100 mg, 0.17 mmol), salicylaldehyde (60 mg, 0.17 mmol), pyruvic acid (PA) (0.6 mmol, 60  $\mu$ L), 2,3-dichloro-5,6-dicyano-1,4-benzoquinone (DDQ) (5.4 mg, 0.02 mmol) in ethanol (5 mL). The reaction mixture was refluxed at 80  $^{\circ}$ C for 6 h. After finishing heating, the flask was cooled down and the reaction mixture was added dropwise to a beaker filled with ice. The formed precipitate was filtered and washed with water several times. Finally, the powder was dried in a normal oven at 60  $^{\circ}$ C. Yield = 82%. Suitable single crystals were grown from a mixture of solvents (acetone, methanol, ethanol and hexane (1:1:1:1)).

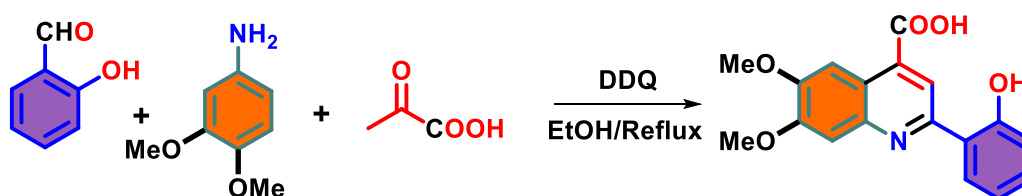

**Scheme S1.** Synthesis of the model compound.

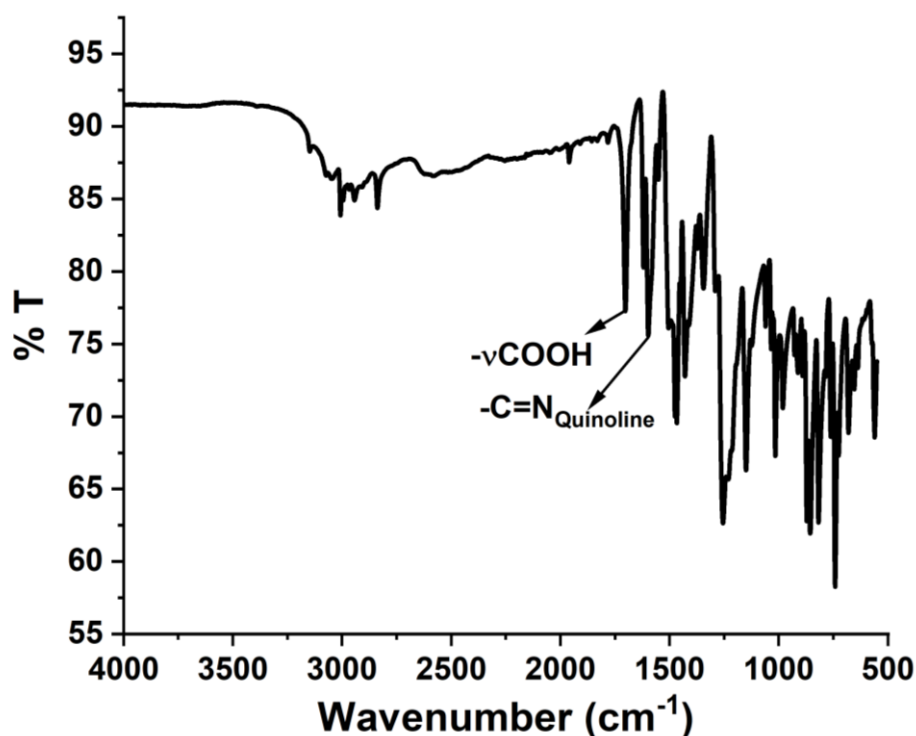

**Figure S1.** FTIR spectrum of the model compound.

PD-DM1  
1H - 200MHz C17

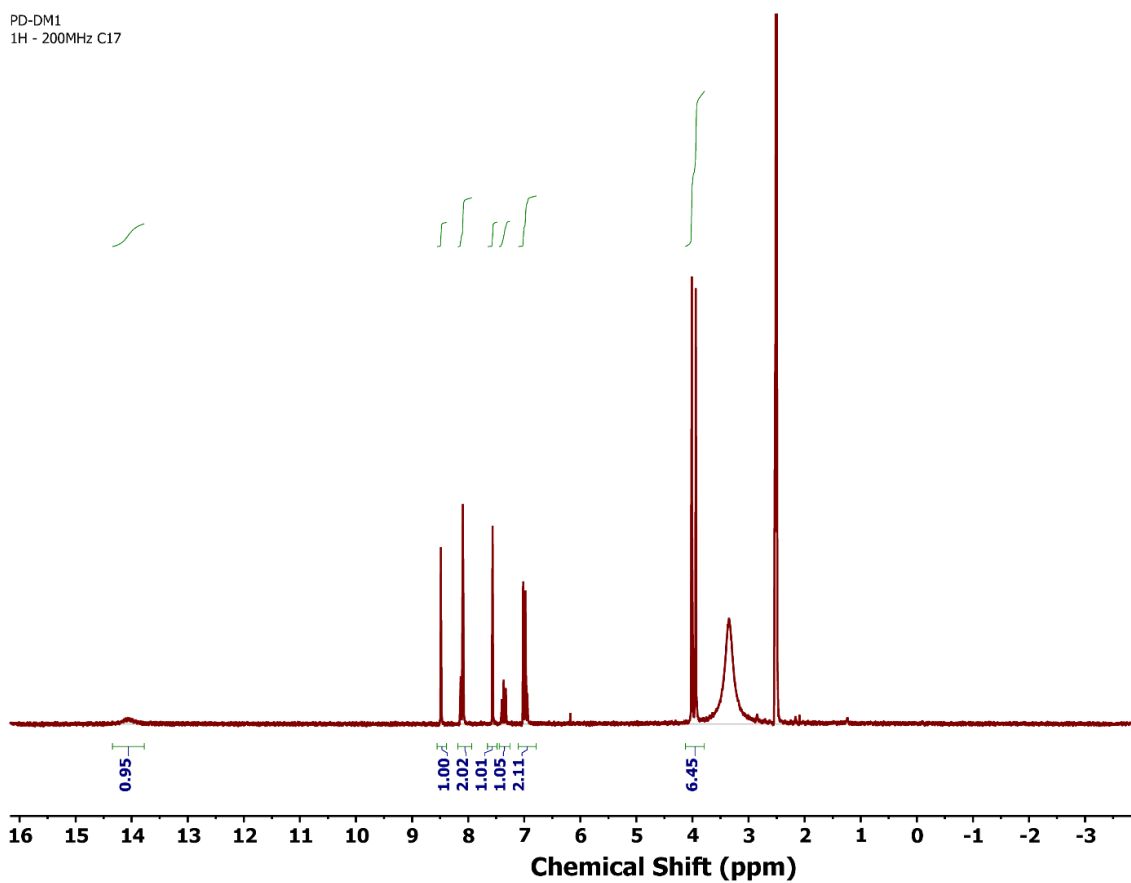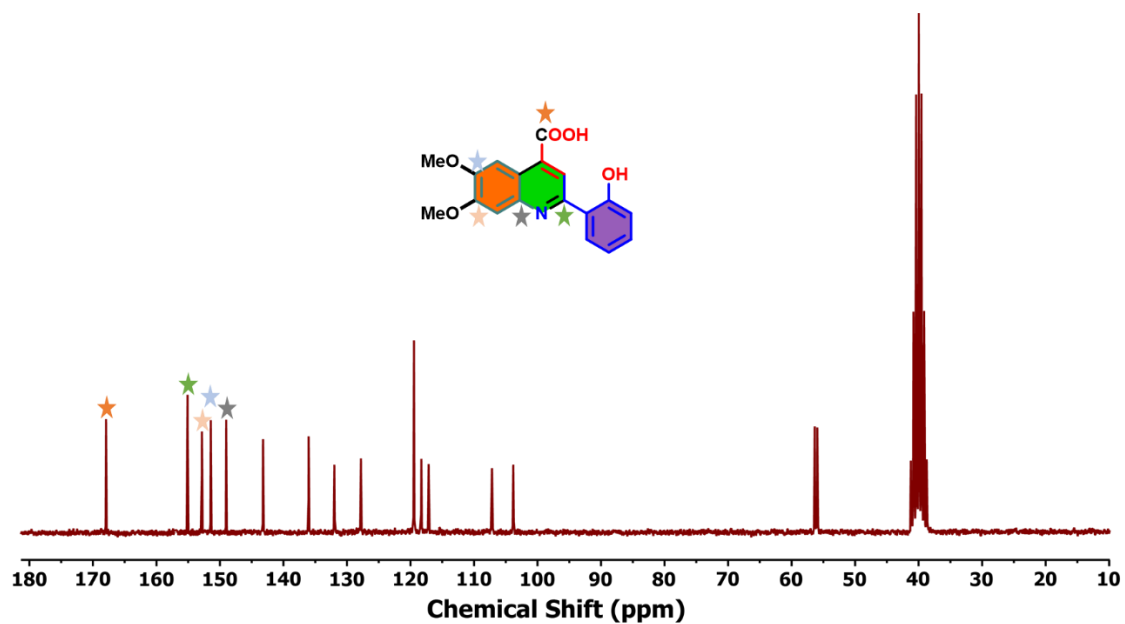

**Figure S2.** <sup>1</sup>H-NMR (top) and <sup>13</sup>C-NMR (bottom) spectra of the model compound.

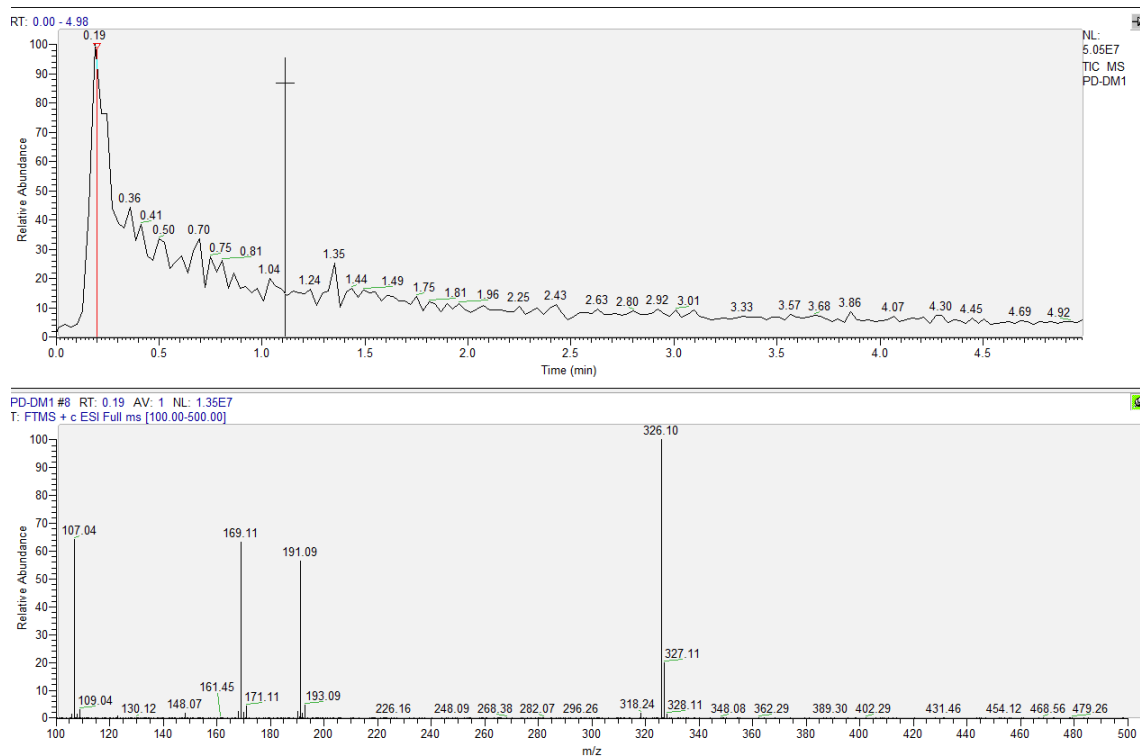

**Figure S3.** HRMS of model compound [M+H: 326.10].

**Table S1.** Crystallographic data and structure refinement parameters for the **Model compound**.

|                                                                                                                                    |                                                                       |
|------------------------------------------------------------------------------------------------------------------------------------|-----------------------------------------------------------------------|
| compound                                                                                                                           | <b>Model Compound</b>                                                 |
| CCDC No.                                                                                                                           | 2208147                                                               |
| chemical formula                                                                                                                   | C <sub>12</sub> H <sub>10</sub> N <sub>0.667</sub> O <sub>3.333</sub> |
| formula weight (g mol <sup>-1</sup> )                                                                                              | 216.882                                                               |
| temperature (K)                                                                                                                    | 150.00(10)                                                            |
| wavelength (Å)                                                                                                                     | 0.71073                                                               |
| crystal system                                                                                                                     | monoclinic                                                            |
| space group                                                                                                                        | <i>P</i> 2 <sub>1</sub> / <i>n</i>                                    |
| <i>a</i> (Å)                                                                                                                       | 5.28232(13)                                                           |
| <i>b</i> (Å)                                                                                                                       | 25.5797(6)                                                            |
| <i>c</i> (Å)                                                                                                                       | 11.0770(3)                                                            |
| $\alpha$ (°)                                                                                                                       | 90                                                                    |
| $\beta$ (°)                                                                                                                        | 101.909(2)                                                            |
| $\gamma$ (°)                                                                                                                       | 90                                                                    |
| <i>Z</i>                                                                                                                           | 6                                                                     |
| <i>V</i> (Å <sup>3</sup> )                                                                                                         | 1464.52(6)                                                            |
| density (g/cm <sup>3</sup> )                                                                                                       | 1.475                                                                 |
| $\mu$ (mm <sup>-1</sup> )                                                                                                          | 0.712                                                                 |
| <i>F</i> (000)                                                                                                                     | 682.562                                                               |
| 2 $\theta$ (°) range for data collection                                                                                           | 4.4020 to 72.539                                                      |
| no. of reflections collected                                                                                                       | 2864                                                                  |
| no. of independent reflections                                                                                                     | 2490                                                                  |
| no. of reflections with <i>I</i> > 2 $\sigma$ ( <i>I</i> )                                                                         | 7746                                                                  |
| <i>R</i> <sub>int</sub>                                                                                                            | 0.1092                                                                |
| no. of parameters refined                                                                                                          | 212                                                                   |
| GOF on <i>F</i> <sup>2</sup>                                                                                                       | 1.0432                                                                |
| final <i>R</i> <sub>1</sub> <sup><i>a</i></sup> / <i>wR</i> <sub>2</sub> <sup><i>b</i></sup> ( <i>I</i> > 2 $\sigma$ ( <i>I</i> )) | 0.0762/0.2177                                                         |
| <i>R</i> <sub>1</sub> <sup><i>a</i></sup> / <i>wR</i> <sub>2</sub> <sup><i>b</i></sup> (all data)                                  | 0.1479/0.3465                                                         |
| largest diff. peak and hole (e Å <sup>-3</sup> )                                                                                   | 2.30/-1.06                                                            |

---

<sup>*a*</sup>*R*<sub>1</sub> =  $\Sigma||F_o| - |F_c||/\Sigma|F_o|$ . <sup>*b*</sup>*wR*<sub>2</sub> =  $[\Sigma w(F_o^2 - F_c^2)^2/\Sigma w(F_o^2)^2]^{1/2}$ , where  $w = 1/[\sigma^2(F_o^2) + (aP)^2 + bP]$ ,  $P = (F_o^2 + 2F_c^2)/3$ .



## Synthesis of DMCR-1

A Pyrex glass tube (15 mL) was charged with 2,4,6-Tris(4-aminophenyl)triazine (56 mg, 0.17 mmol), 4,4',4''-(1,3,5-triazine-2,4,6-triyl)tribenzaldehyde (60 mg, 0.17 mmol), pyruvic acid (PA) (0.6 mmol, 60  $\mu$ L), 2,3-dichloro-5,6-dicyano-1,4-benzoquinone (DDQ) (10 mg, 0.04 mmol), 1.5 mL *o*-DCB and 1.5 mL *n*-BuOH. The tube was first sonicated for 20 minutes and then flash frozen at 77 K (liquid N<sub>2</sub> bath) and degassed by three freeze-pump-thaw cycles. The internal pressure was evacuated to 10<sup>-3</sup> mbar. The tube was sealed and placed in a preheated oven at 120 °C for 3 days. After finishing heating, the tube was cooled down and cut open. The formed yellow precipitate was filtered and washed with acetone/MeOH several times. Finally, the powder was dried in a normal oven at 80 °C. Yield = 92% (11 mg). Anal. Calcd (%): C, 71.28.; H, 4.32.; N, 13.85. Found (%): C, 70.92.; H, 4.42.; N, 13.27.

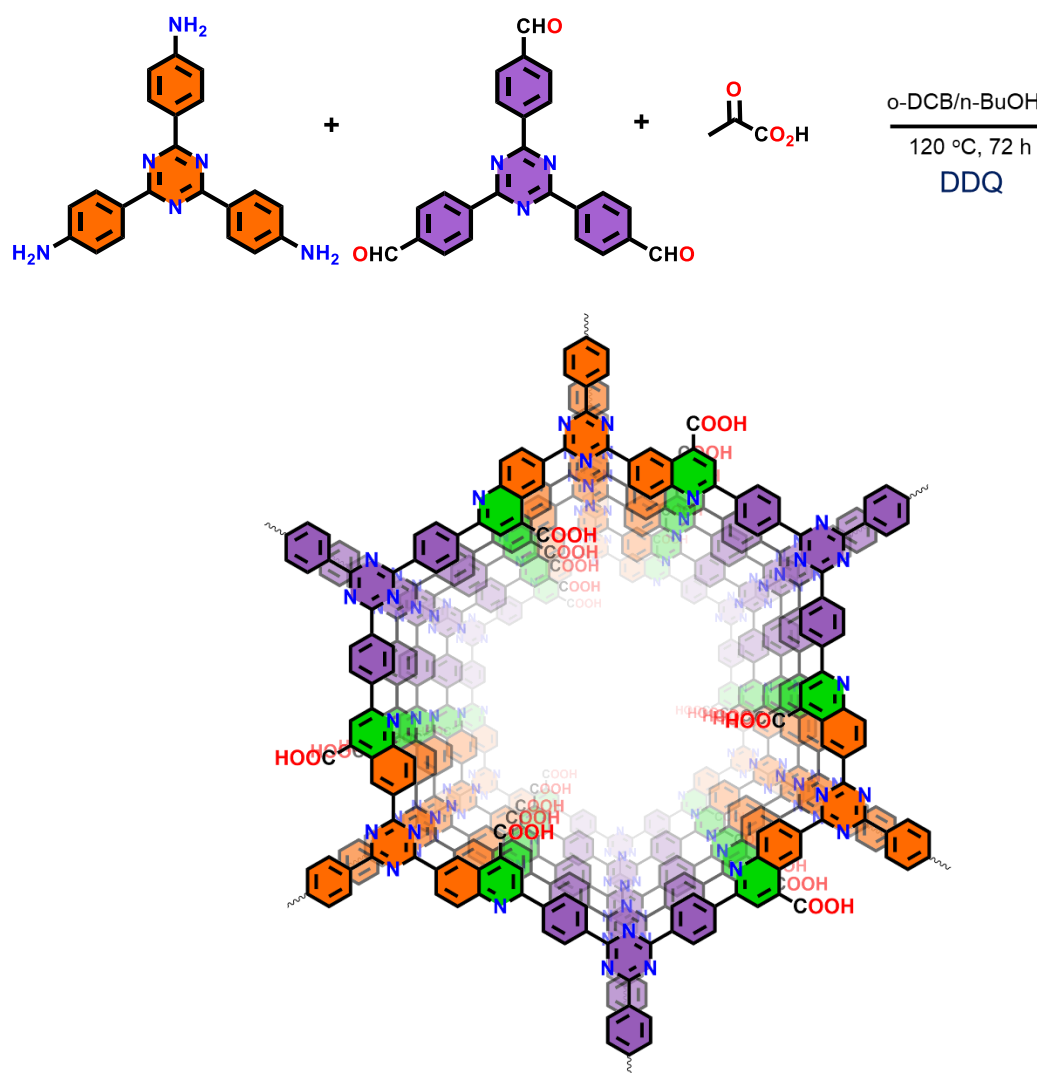

**Scheme S2.** Solvothermal synthesis of **DMCR-1**.

## Synthesis of DMCR-1NH

A Pyrex glass tube (15 mL) was charged with 2,4,6-Tris(4-aminophenyl)triazine (Tta) (56 mg, 0.17 mmol), 4,4',4''-(1,3,5-triazine-2,4,6-triyl)tribenzaldehyde (Tta) (60 mg, 0.17 mmol), pyruvic acid (PA) (0.60 mmol, 60  $\mu$ L), 1.5 mL *o*-DCB and 1.5 mL *n*-BuOH. The tube was first sonicated for 20 minutes and then flash frozen at 77 K (liquid N<sub>2</sub> bath) and degassed by three freeze-pump-thaw cycles. The internal pressure was evacuated to 10<sup>-3</sup> mbar. The tube was sealed and placed in a preheated oven at 120 °C for 3 days. After finishing heating, the tube was cooled down and opened. The formed yellow precipitate was filtered and washed with acetone/MeOH several times. Finally, the powder was dried in a normal oven at 80 °C. Yield = 94.1% (118 mg). Anal. Calcd (%): C, 70.81.; H, 4.95.; N, 13.76. Found (%): C, 71.01.; H, 4.53.; N, 14.12.

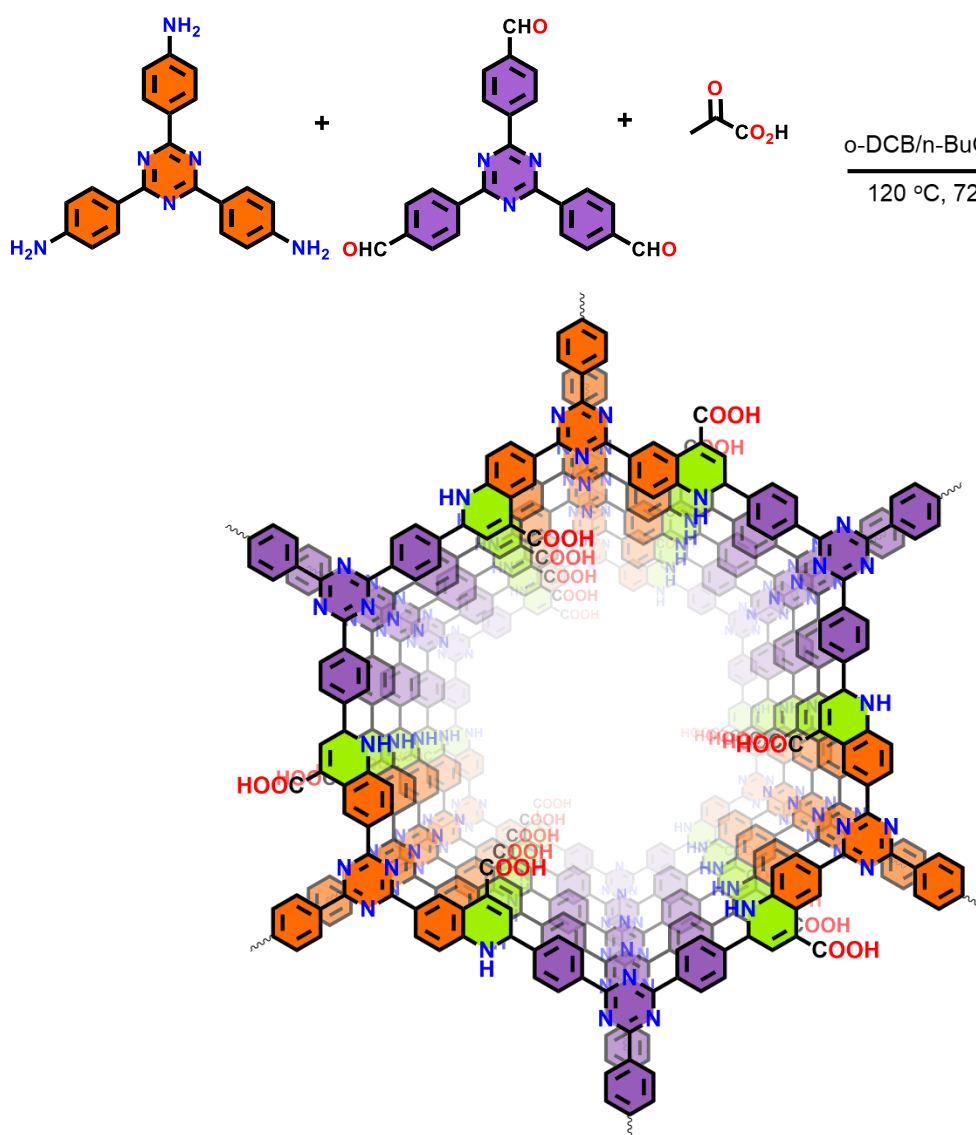

**Scheme S3.** Solvothermal synthesis of **DMCR-1NH**.

### Solvothermal synthesis of Imine-1

A Pyrex glass tube (15 mL) was charged with 2,4,6-Tris(4-aminophenyl)triazine (Tat) (56 mg, 0.17 mmol), 4,4',4''-(1,3,5-triazine-2,4,6-triyl)tribenzaldehyde (Tta) (60 mg, 0.17 mmol), 1.5 mL *o*-DCB, 1.5 mL *n*-BuOH and 0.2 mL 6 M acetic acid aqueous solution. The tube was first sonicated for 20 minutes and then flash frozen at 77 K (liquid N<sub>2</sub> bath) and degassed by three freeze-pump-thaw cycles. The internal pressure was evacuated to 10<sup>-3</sup> mbar. The tube was sealed and placed in a preheated oven at 120 °C for 3 days. After finishing heating, the tube was cooled down and opened. The formed yellow precipitate was filtered and washed with acetone/MeOH several times. Finally, the powder was dried in a normal oven at 80 °C. Yield = 82% (105 mg). Anal. Calcd (%): C, 76.57.; H, 4.75.; N, 17.86. Found (%): C, 75.55.; H, 4.12.; N, 17.02.

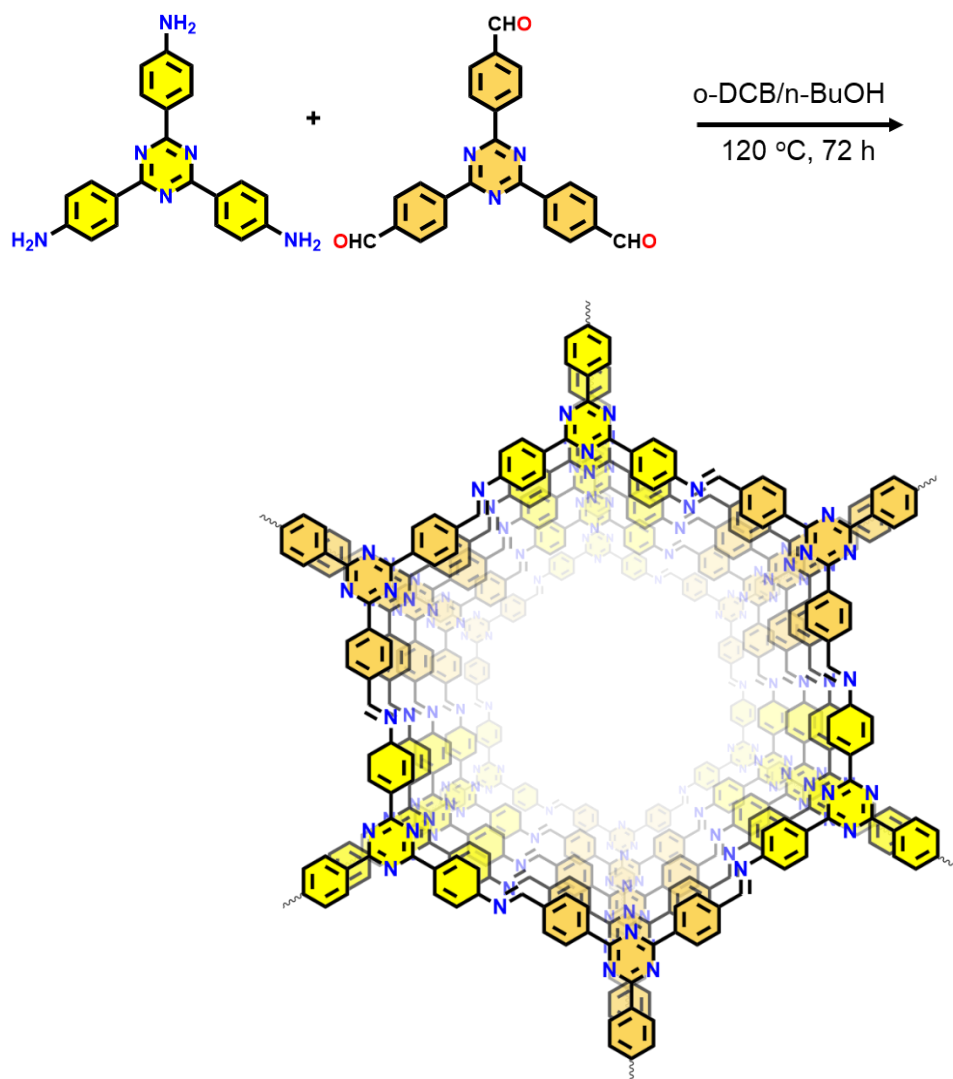

**Scheme S4.** Solvothermal synthesis of **Imine-1**.

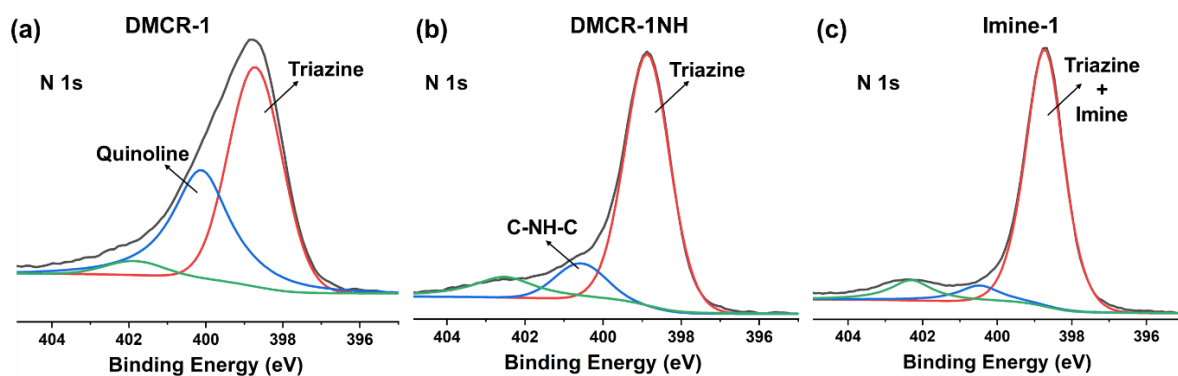

**Figure S4.** N(1s) XPS spectra of (a) **DMCR-1**, (b) **DMCR-1NH**, and (c) **Imine-1**.

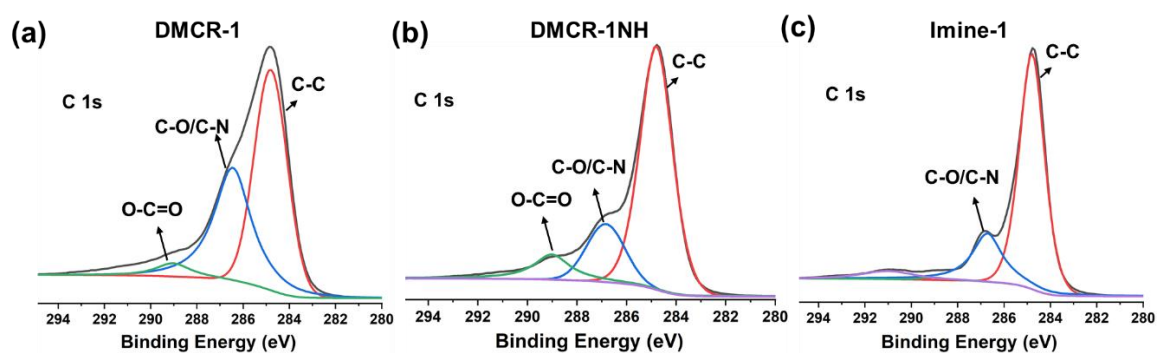

**Figure S5.** C(1s) XPS spectra of (a) **DMCR-1**, (b) **DMCR-1NH**, and (c) **Imine-1**.

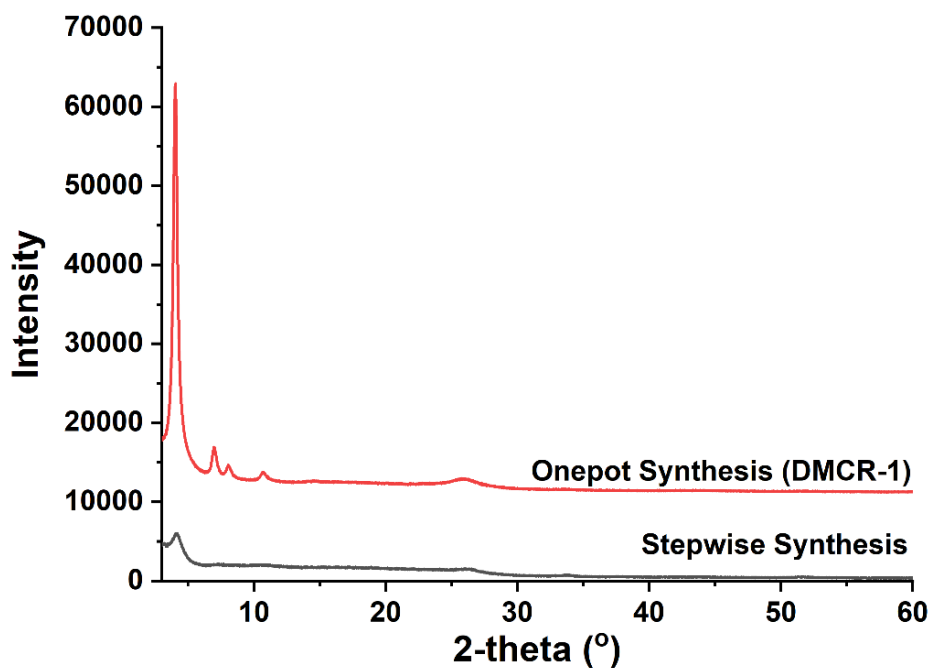

**Figure S6.** Comparison of experimental PXRD patterns of one-pot and stepwise synthesized **DMCR-1**.

### Section S3. Structural Modelling and Atomic Coordinates of COFs

The structural crystal models with **hcb** topology of all the COFs were initially constructed in hexagonal unit cell in the Materials Studio suite of programs by Accelrys. Geometry optimization of the structures with Universal Force Field (UFF) led to satisfactory models whose theoretical pattern matched well the experimentally obtained patterns in terms of reflection positions and relative intensities. The Pawley profile refinements were performed using a Pseudo-Voigt profile function. The observed diffraction patterns were subjected to a polynomial background subtraction and the refined parameters included the zero-point shift, the unit cell parameters, the FWHM parameters and the peak asymmetry (Berar-Baldizzone function). For all the COFs, AA stacking and AB stacking models were constructed, and their corresponding PXRD patterns were calculated. We chose to represent the AA structural model of the COFs in the fully eclipsed configuration (AA<sub>e</sub>) except for **Imine-1** COF for which clear experimental observation of layer slippage can be deduced from the splitting of the lower symmetry reflections in the PXRD pattern. For **Imine-1** COF a model with slipped AA stacking (AA<sub>s</sub>) in which the layers shift laterally by about 1.5 Å was constructed.

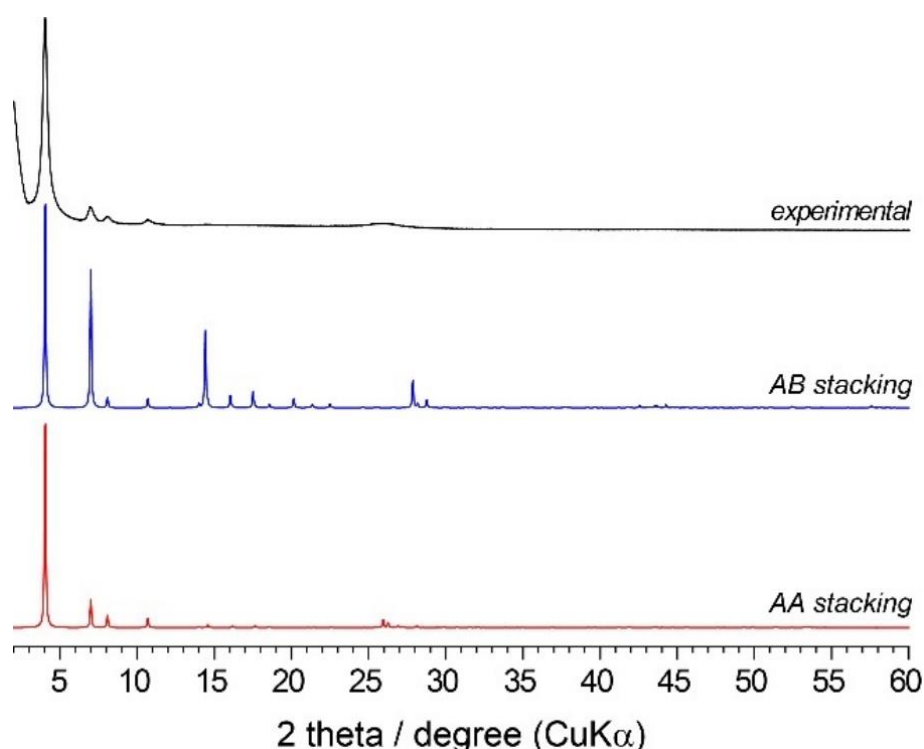

**Figure S7.** Simulated X-ray diffraction patterns for generated **hcb** hexagonal layered structures adopting fully eclipsed (red) and staggered (blue) stacking arrangement compared to the experimentally obtained pattern of **DMCR-1** (black).

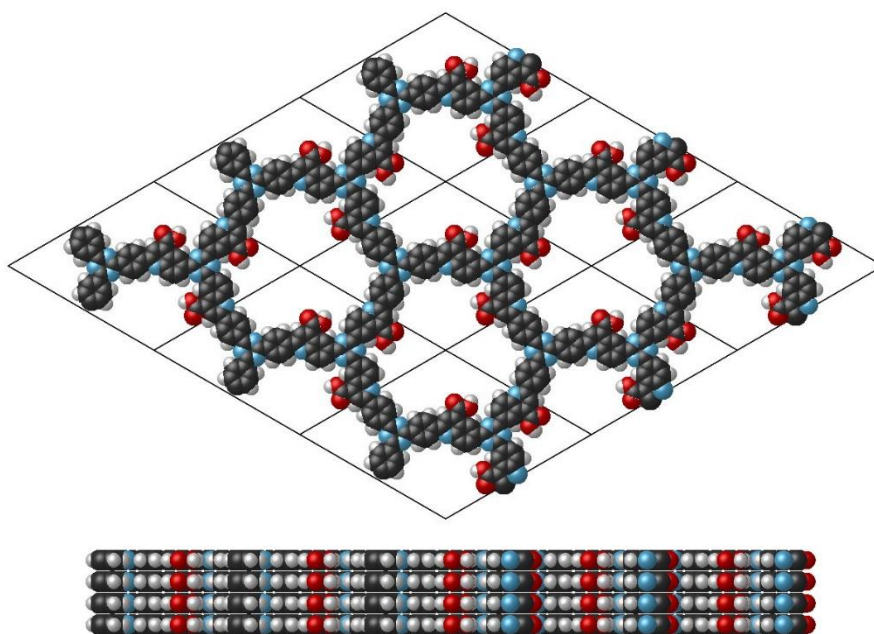

**Figure S8.** Simulated **hcb** 2D hexagonal layered model with eclipsed (AA) stacking arrangement of **DMCR-1**.

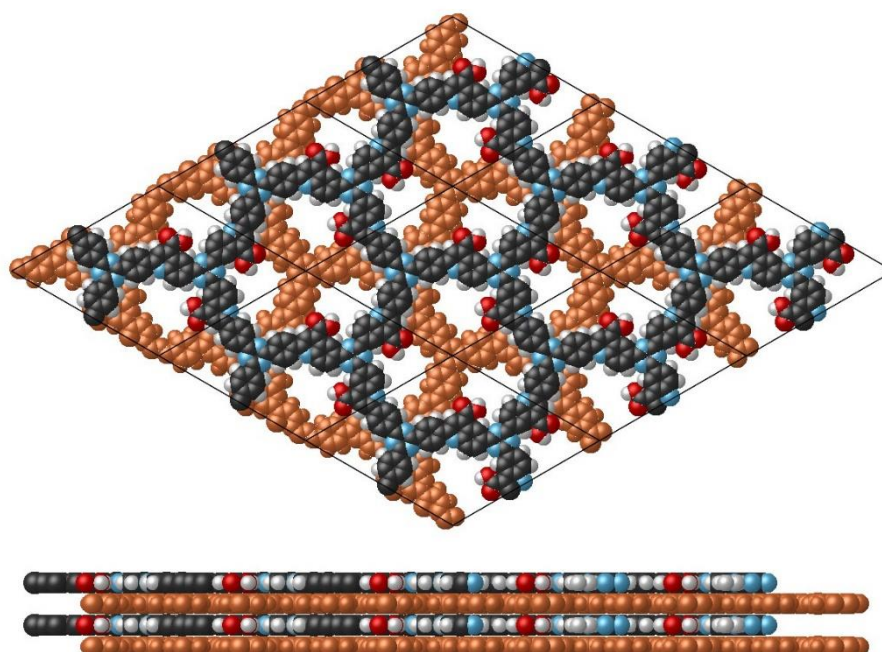

**Figure S9.** Simulated **hcb** 2D hexagonal layered model with staggered (AB) stacking arrangement of **DMCR-1**.



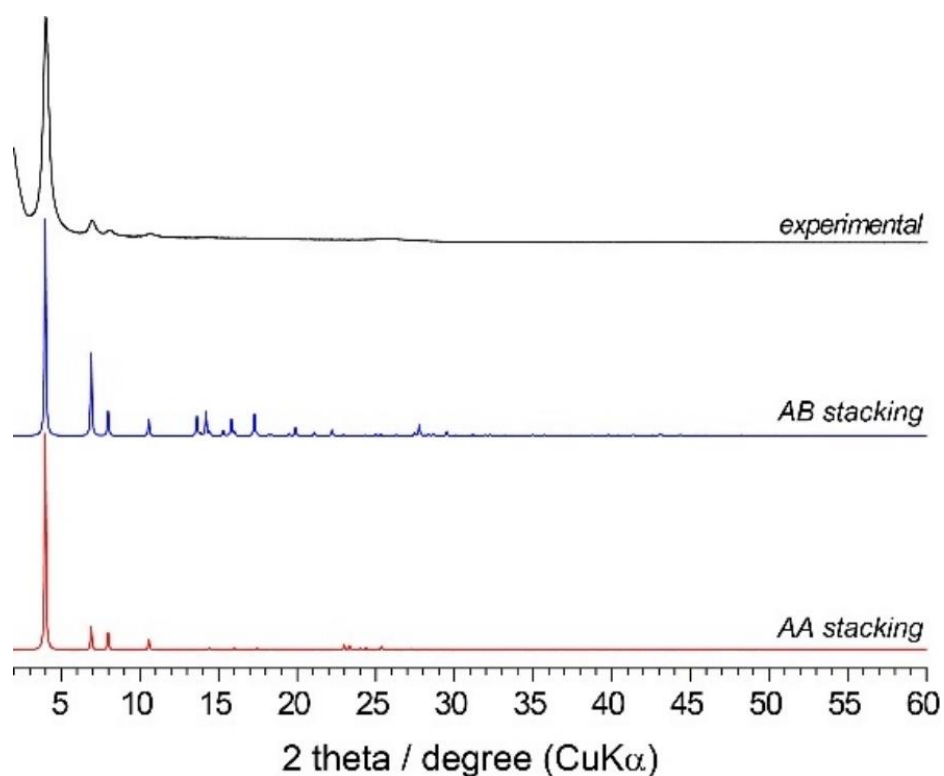

**Figure S10.** Simulated X-ray diffraction patterns for generated **hcb** hexagonal layered structures adopting fully eclipsed (red) and staggered (blue) stacking arrangement compared to the experimentally obtained pattern of **DMCR-1NH** (black).

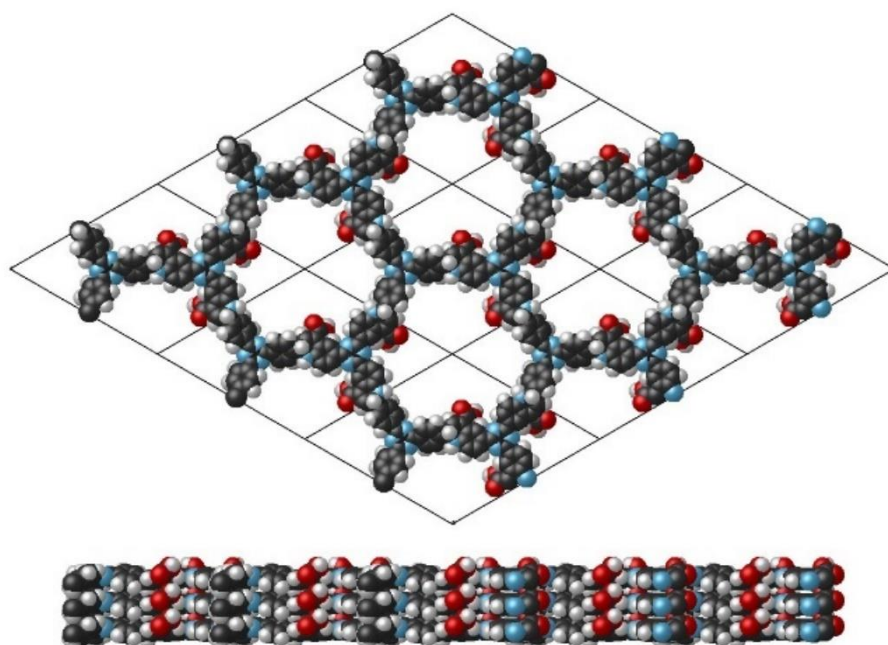

**Figure S11.** Simulated **hcb** 2D hexagonal layered model with eclipsed (AA) stacking arrangement of **DMCR-1NH**.

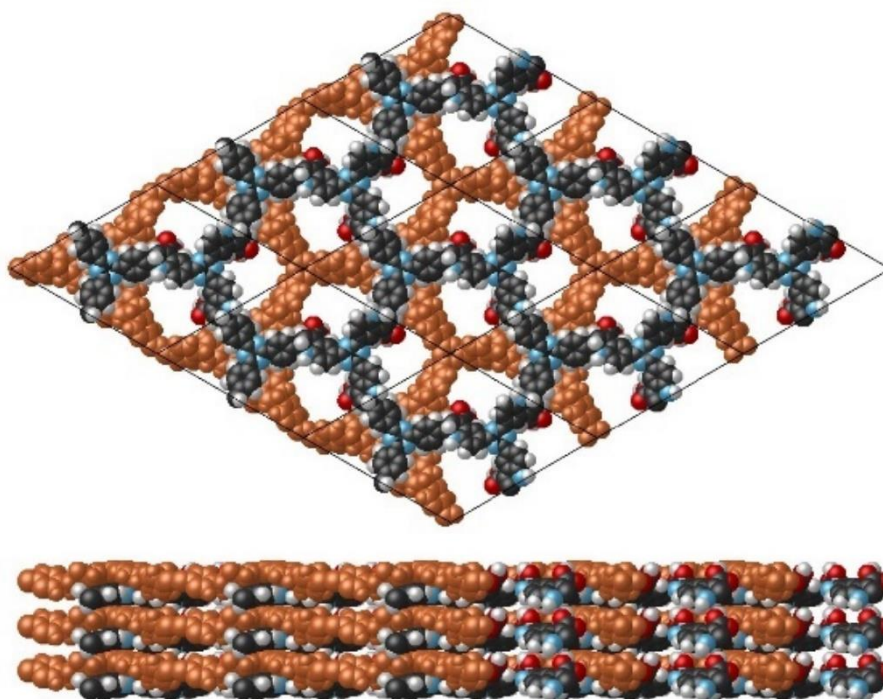

**Figure S12.** Simulated **hcb** 2D hexagonal layered model with staggered (AB) stacking arrangement of **DMCR-1NH**.

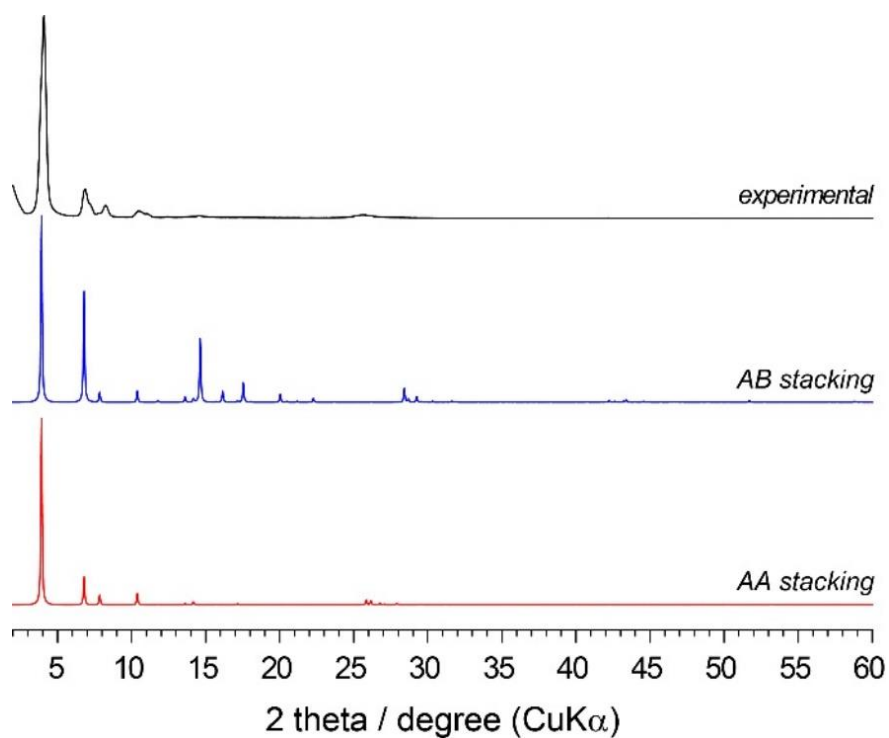

**Figure S13.** Simulated X-ray diffraction patterns for generated **hcb** hexagonal layered structures adopting fully eclipsed (red) and staggered (blue) stacking arrangement compared to the experimentally obtained pattern of **Imine-1** (black).



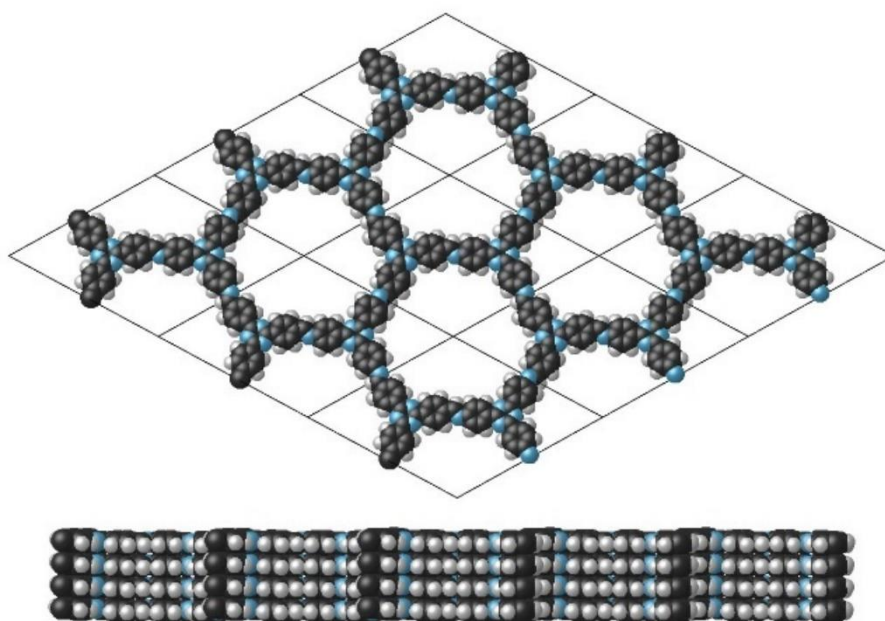

**Figure S14.** Simulated **hcb** 2D hexagonal layered model with eclipsed (AA) stacking arrangement of **Imine-1**.

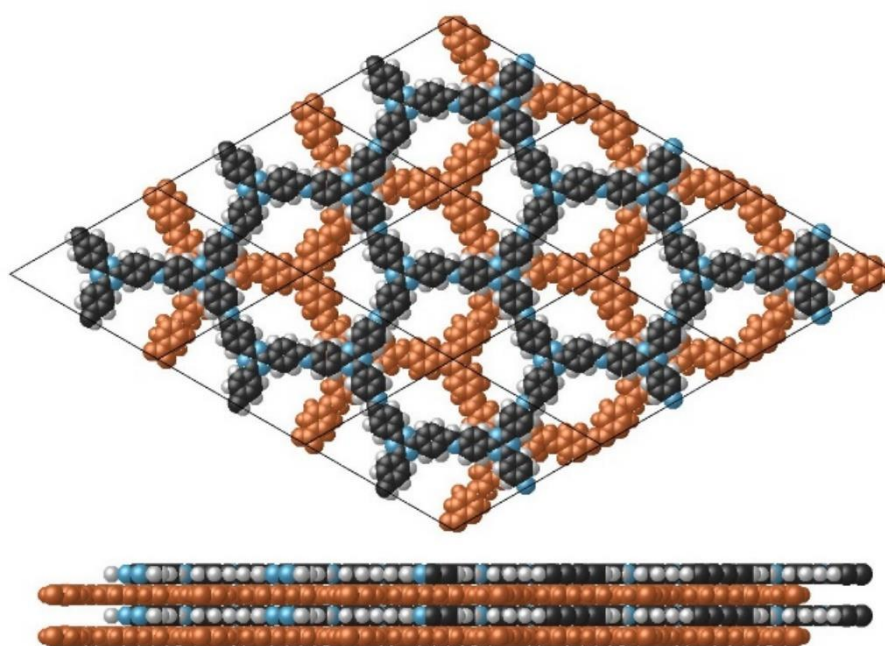

**Figure S15.** Simulated **hcb** 2D hexagonal layered model with staggered (AB) stacking arrangement of **Imine-1**.

**Table S2. Fractional Atomic Coordinates for DMCR-1**

| <b>DMCR-1</b>                                                                    |                  |          |          |          |
|----------------------------------------------------------------------------------|------------------|----------|----------|----------|
| Space Group: $P\bar{6}$ (174)                                                    |                  |          |          |          |
| $a = 25.2864 \text{ \AA}$ , $b = 25.2864 \text{ \AA}$ , $c = 3.4327 \text{ \AA}$ |                  |          |          |          |
| $\alpha = \beta = 90.00^\circ$ , $\gamma = 120.00^\circ$                         |                  |          |          |          |
| <b>Atom label</b>                                                                | <b>Atom type</b> | <b>x</b> | <b>y</b> | <b>z</b> |
| C1                                                                               | C                | 0.27230  | 0.63587  | 0.00000  |
| N2                                                                               | N                | 0.30336  | 0.60615  | 0.00000  |
| C3                                                                               | C                | -0.20755 | -0.62090 | 0.00000  |
| C4                                                                               | C                | -0.18431 | -0.65980 | 0.00000  |
| C5                                                                               | C                | -0.12256 | -0.63745 | 0.00000  |
| C6                                                                               | C                | -0.08200 | -0.57521 | 0.00000  |
| C7                                                                               | C                | -0.10584 | -0.53654 | 0.00000  |
| C8                                                                               | C                | -0.16756 | -0.55899 | 0.00000  |
| N9                                                                               | N                | 0.01978  | -0.48866 | 0.00000  |
| C10                                                                              | C                | -0.01542 | -0.54904 | 0.00000  |
| C11                                                                              | C                | 0.11064  | -0.49347 | 0.00000  |
| C12                                                                              | C                | 0.08030  | -0.46033 | 0.00000  |
| C13                                                                              | C                | 0.11195  | -0.39786 | 0.00000  |
| C14                                                                              | C                | 0.17413  | -0.36667 | 0.00000  |
| C15                                                                              | C                | 0.20590  | -0.39759 | 0.00000  |
| C16                                                                              | C                | 0.17403  | -0.46063 | 0.00000  |
| H17                                                                              | H                | -0.21386 | -0.70784 | 0.00000  |
| H18                                                                              | H                | -0.10794 | -0.66992 | 0.00000  |
| H19                                                                              | H                | -0.07684 | -0.48844 | 0.00000  |
| H20                                                                              | H                | -0.18384 | -0.52760 | 0.00000  |
| H21                                                                              | H                | 0.08814  | -0.37320 | 0.00000  |
| H22                                                                              | H                | 0.19725  | -0.31823 | 0.00000  |
| H23                                                                              | H                | 0.20028  | -0.48209 | 0.00000  |
| C24                                                                              | C                | 0.64473  | 0.37168  | 0.00000  |
| N25                                                                              | N                | 0.60686  | 0.31157  | 0.00000  |
| C26                                                                              | C                | 0.58396  | 0.59633  | 0.00000  |
| C27                                                                              | C                | 0.55752  | 0.63290  | 0.00000  |
| C28                                                                              | C                | 0.59975  | 0.69946  | 0.00000  |
| O29                                                                              | O                | 0.58056  | 0.73922  | 0.00000  |
| O30                                                                              | O                | 0.65388  | 0.71890  | 0.00000  |
| H31                                                                              | H                | 0.60817  | 0.78193  | 0.00000  |
| H32                                                                              | H                | 0.63199  | 0.61748  | 0.00000  |

**Table S3. Fractional Atomic Coordinates for DMCR-1NH**

| <b>DMCR-1NH</b>                                                            |                  |          |          |          |
|----------------------------------------------------------------------------|------------------|----------|----------|----------|
| Space Group: <i>P</i> 3 (143)                                              |                  |          |          |          |
| $a = 25.5305 \text{ \AA}, b = 25.5305 \text{ \AA}, c = 3.8637 \text{ \AA}$ |                  |          |          |          |
| $\alpha = \beta = 90.00^\circ, \gamma = 120.00^\circ$                      |                  |          |          |          |
| <b>Atom label</b>                                                          | <b>Atom type</b> | <b>x</b> | <b>y</b> | <b>z</b> |
| C1                                                                         | C                | 0.27233  | 0.63940  | -1.00544 |
| N2                                                                         | N                | 0.29987  | 0.60614  | -1.00565 |
| C3                                                                         | C                | 0.64396  | 0.37106  | 0.05734  |
| N4                                                                         | N                | 0.60658  | 0.31076  | 0.05614  |
| C5                                                                         | C                | -0.20763 | -0.61928 | -0.97451 |
| C6                                                                         | C                | -0.18521 | -0.65234 | -1.14171 |
| C7                                                                         | C                | -0.12391 | -0.62669 | -1.20590 |
| C8                                                                         | C                | -0.08325 | -0.56802 | -1.09571 |
| C9                                                                         | C                | -0.10573 | -0.53610 | -0.91235 |
| C10                                                                        | C                | -0.16731 | -0.56121 | -0.85709 |
| N11                                                                        | N                | 0.01727  | -0.47582 | -1.12415 |
| C12                                                                        | C                | -0.01776 | -0.54008 | -1.20270 |
| C13                                                                        | C                | 0.10760  | -0.48167 | -0.99772 |
| C14                                                                        | C                | 0.08045  | -0.44696 | -1.06161 |
| C15                                                                        | C                | 0.11541  | -0.38445 | -1.08232 |
| C16                                                                        | C                | 0.17761  | -0.35623 | -1.05451 |
| C17                                                                        | C                | 0.20603  | -0.39024 | -1.01303 |
| C18                                                                        | C                | 0.17065  | -0.45296 | -0.98662 |
| H19                                                                        | H                | -0.21535 | -0.69700 | -1.23865 |
| H20                                                                        | H                | -0.10833 | -0.65209 | -1.35262 |
| H21                                                                        | H                | -0.07631 | -0.49152 | -0.81361 |
| H22                                                                        | H                | -0.18346 | -0.53516 | -0.72239 |
| H23                                                                        | H                | 0.09447  | -0.35762 | -1.12785 |
| H24                                                                        | H                | 0.20345  | -0.30787 | -1.07608 |
| H25                                                                        | H                | 0.19266  | -0.47916 | -0.96750 |
| C26                                                                        | C                | 0.57443  | 0.58521  | 0.94388  |
| C27                                                                        | C                | 0.54799  | 0.61675  | 1.03924  |
| C28                                                                        | C                | 0.58576  | 0.67757  | 1.18995  |
| O29                                                                        | O                | 0.56201  | 0.70059  | 1.41032  |
| O30                                                                        | O                | 0.63926  | 0.70680  | 1.12030  |
| H31                                                                        | H                | 0.58596  | 0.74003  | 1.51071  |
| H32                                                                        | H                | 0.62263  | 0.60551  | 0.96756  |
| H33                                                                        | H                | 0.44880  | 0.44842  | -0.20002 |
| H34                                                                        | H                | 0.54430  | 0.52667  | -0.48532 |

**Table S4. Fractional Atomic Coordinates for Imine-1**

| <b>Imine-1</b>                                                                   |   |         |         |          |
|----------------------------------------------------------------------------------|---|---------|---------|----------|
| Space Group: <i>P</i> 1 (1)                                                      |   |         |         |          |
| $a = 26.1488 \text{ \AA}$ , $b = 25.7622 \text{ \AA}$ , $c = 3.4442 \text{ \AA}$ |   |         |         |          |
| $\alpha = 79.92^\circ$ , $\beta = 81.76^\circ$ , $\gamma = 120.00^\circ$         |   |         |         |          |
|                                                                                  |   |         |         |          |
| C1                                                                               | C | 0.27088 | 0.64427 | -0.06566 |
| N2                                                                               | N | 0.30148 | 0.61445 | -0.05521 |
| C3                                                                               | C | 0.63941 | 0.37626 | 0.00198  |
| N4                                                                               | N | 0.60257 | 0.31508 | 0.02055  |
| C5                                                                               | C | 0.78627 | 0.38730 | 0.02435  |
| C6                                                                               | C | 0.80850 | 0.34760 | 0.07785  |
| C7                                                                               | C | 0.86955 | 0.37150 | 0.08114  |
| C8                                                                               | C | 0.90952 | 0.43540 | 0.03361  |
| C9                                                                               | C | 0.88750 | 0.47524 | -0.02010 |
| C10                                                                              | C | 0.82646 | 0.45139 | -0.02358 |
| N11                                                                              | N | 0.01756 | 0.51583 | -0.07433 |
| C12                                                                              | C | 0.97363 | 0.45934 | 0.04235  |
| C13                                                                              | C | 0.11044 | 0.51328 | -0.00694 |
| C14                                                                              | C | 0.08073 | 0.54582 | -0.06679 |
| C15                                                                              | C | 0.11381 | 0.61042 | -0.12133 |
| C16                                                                              | C | 0.17551 | 0.64251 | -0.12215 |
| C17                                                                              | C | 0.20546 | 0.61032 | -0.06544 |
| C18                                                                              | C | 0.17224 | 0.54538 | -0.00887 |
| H19                                                                              | H | 0.77880 | 0.29799 | 0.11702  |
| H20                                                                              | H | 0.88550 | 0.33990 | 0.12287  |
| H21                                                                              | H | 0.91732 | 0.52481 | -0.05829 |
| H22                                                                              | H | 0.81088 | 0.48329 | -0.06516 |
| H23                                                                              | H | 0.98872 | 0.42709 | 0.06515  |
| H24                                                                              | H | 0.08684 | 0.46336 | 0.04179  |
| H25                                                                              | H | 0.09164 | 0.63612 | -0.16644 |
| H26                                                                              | H | 0.19970 | 0.69255 | -0.16788 |
| H27                                                                              | H | 0.19383 | 0.51910 | 0.03712  |
| C28                                                                              | C | 0.36168 | 0.64549 | -0.06065 |
| N29                                                                              | N | 0.39116 | 0.70693 | -0.07430 |
| C30                                                                              | C | 0.62470 | 0.27722 | 0.03519  |
| N31                                                                              | N | 0.68421 | 0.30100 | 0.03563  |
| C32                                                                              | C | 0.61500 | 0.41732 | -0.01649 |
| C33                                                                              | C | 0.65448 | 0.48214 | -0.08614 |
| C34                                                                              | C | 0.63146 | 0.52088 | -0.10471 |
| C35                                                                              | C | 0.56857 | 0.49570 | -0.05295 |
| C36                                                                              | C | 0.52894 | 0.43092 | 0.01752  |
| C37                                                                              | C | 0.55195 | 0.39217 | 0.03498  |

|     |   |         |          |          |
|-----|---|---------|----------|----------|
| N38 | N | 0.48731 | 0.51548  | -0.02433 |
| C39 | C | 0.54544 | 0.53766  | -0.07369 |
| C40 | C | 0.48997 | 0.61535  | -0.09979 |
| C41 | C | 0.45792 | 0.55010  | -0.03583 |
| C42 | C | 0.39440 | 0.51688  | 0.01999  |
| C43 | C | 0.36305 | 0.54767  | 0.01165  |
| C44 | C | 0.39481 | 0.61273  | -0.05192 |
| C45 | C | 0.45861 | 0.64617  | -0.10714 |
| H46 | H | 0.70328 | 0.50310  | -0.12753 |
| H47 | H | 0.66288 | 0.57066  | -0.15893 |
| H48 | H | 0.48018 | 0.41013  | 0.05827  |
| H49 | H | 0.52023 | 0.34246  | 0.08963  |
| H50 | H | 0.57816 | 0.58707  | -0.13088 |
| H51 | H | 0.53889 | 0.64319  | -0.14321 |
| H52 | H | 0.36904 | 0.46672  | 0.06938  |
| H53 | H | 0.31390 | 0.52038  | 0.05586  |
| H54 | H | 0.48451 | 0.69634  | -0.15702 |
| C55 | C | 0.36107 | 0.73727  | -0.08050 |
| N56 | N | 0.30097 | 0.70563  | -0.07726 |
| C57 | C | 0.72158 | 0.36198  | 0.01955  |
| N58 | N | 0.69890 | 0.39938  | 0.00067  |
| C59 | C | 0.58443 | 0.21073  | 0.05066  |
| C60 | C | 0.52122 | 0.18391  | 0.09821  |
| C61 | C | 0.48320 | 0.12102  | 0.11663  |
| C62 | C | 0.50762 | 0.08387  | 0.08311  |
| C63 | C | 0.57080 | 0.11055  | 0.03433  |
| C64 | C | 0.60880 | 0.17334  | 0.01795  |
| N65 | N | 0.48872 | 0.99581  | -0.10548 |
| C66 | C | 0.46660 | 0.01774  | 0.09912  |
| C67 | C | 0.39150 | 0.89710  | -0.06726 |
| C68 | C | 0.45490 | 0.93123  | -0.10187 |
| C69 | C | 0.48697 | 0.90135  | -0.13480 |
| C70 | C | 0.45665 | 0.83839  | -0.12635 |
| C71 | C | 0.39333 | 0.80403  | -0.08901 |
| C72 | C | 0.36113 | 0.83412  | -0.05932 |
| H73 | H | 0.50093 | 0.21132  | 0.12436  |
| H74 | H | 0.43464 | 0.10144  | 0.15459  |
| H75 | H | 0.59094 | 0.08299  | 0.00846  |
| H76 | H | 0.65731 | 0.19255  | -0.02081 |
| H77 | H | 0.41795 | -0.00126 | 0.16179  |
| H78 | H | 0.36483 | 0.91819  | -0.04744 |
| H79 | H | 0.53577 | 0.92696  | -0.16325 |
| H80 | H | 0.48295 | 0.81679  | -0.15039 |
| H81 | H | 0.31233 | 0.80907  | -0.03059 |

## Section S4. FESEM and HRTEM Images, Surface Area and TGA of COFs

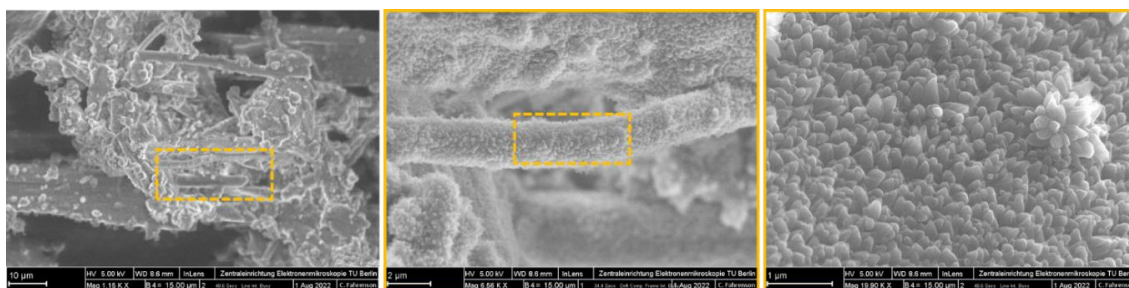

Figure S16. FESEM image of **DMCR-1**.

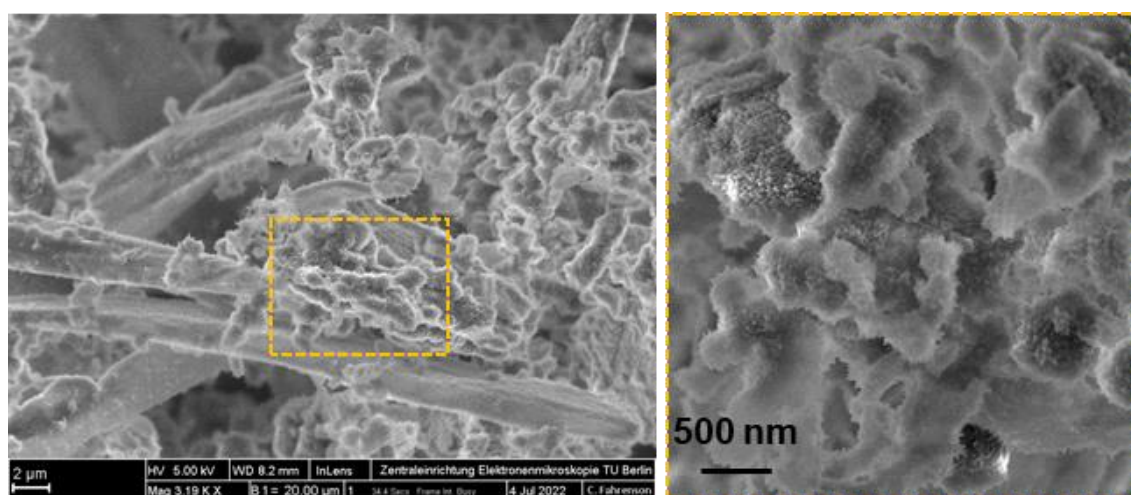

Figure S17. FESEM image of **DMCR-1NH**.

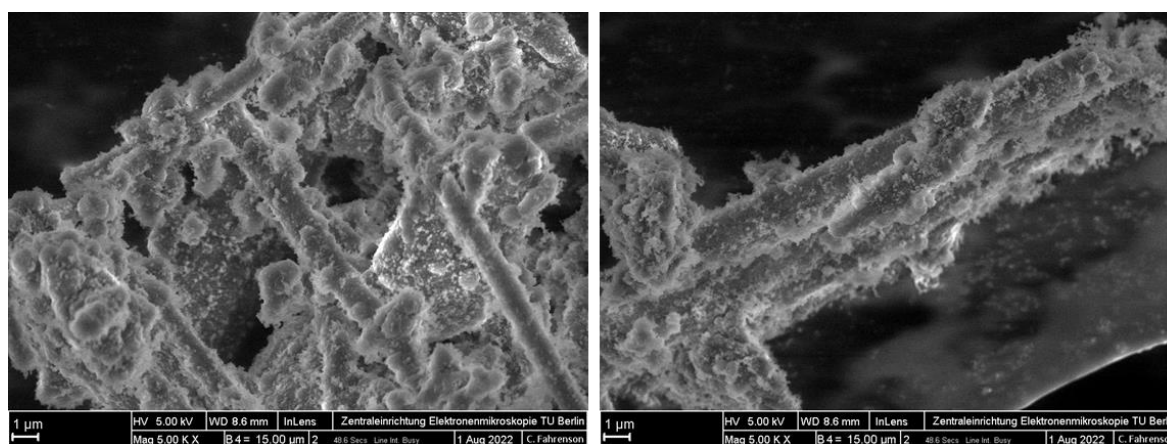

Figure S18. FESEM image of **Imine-1**.



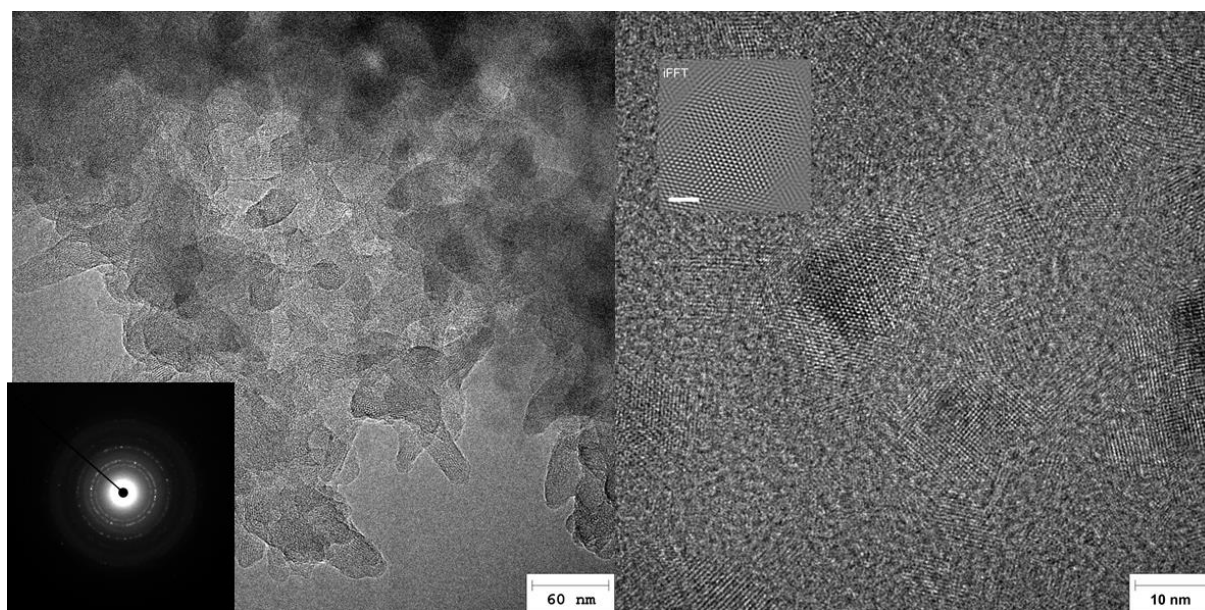

**Figure S19.** (Right) TEM image and (left) low dose HRTEM image of **DMCR-1**. Fast Fourier Transform (FFT) from the square on **DMCR-1**.

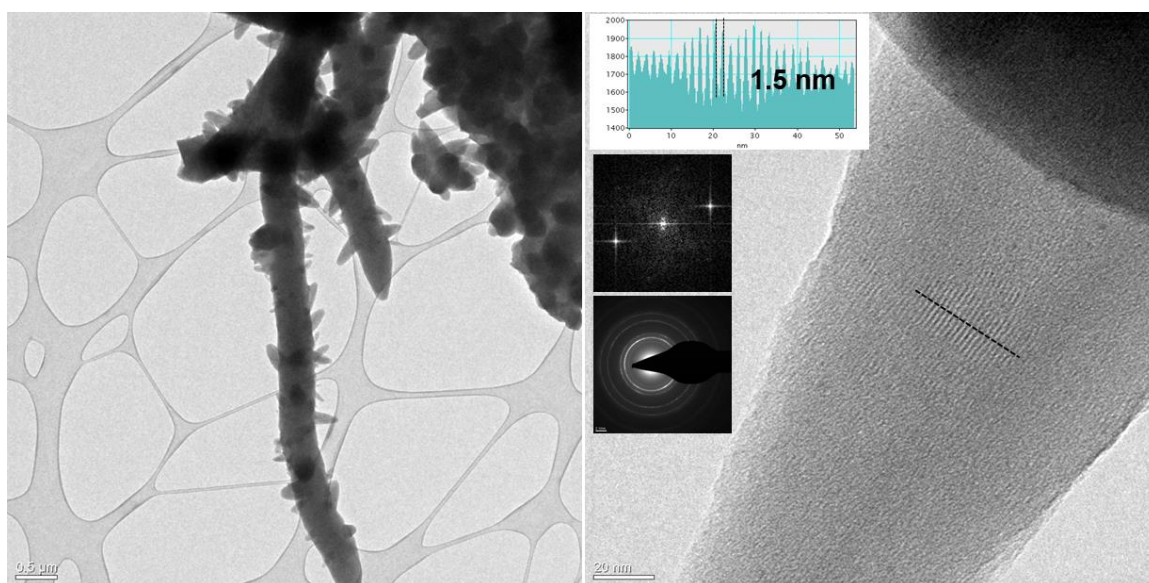

**Figure S20.** (Right) TEM image and (left) low dose HRTEM image of **DMCR-1NH**. Zoom image of nano rod showing ordered crystalline layers.

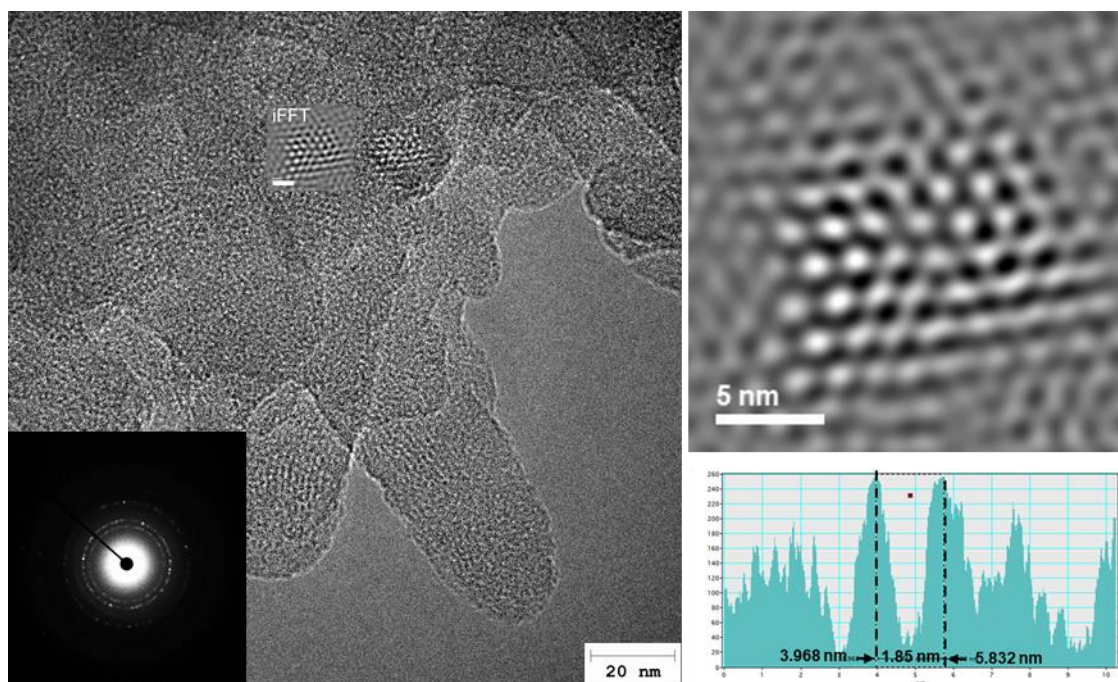

**Figure S21.** Low dose HRTEM image of **Imine-1**. A zoom on the nano rod shows a pore size of the COF (1.85 nm) close to the simulated structure.



## BETSI analysis for DMCR-1

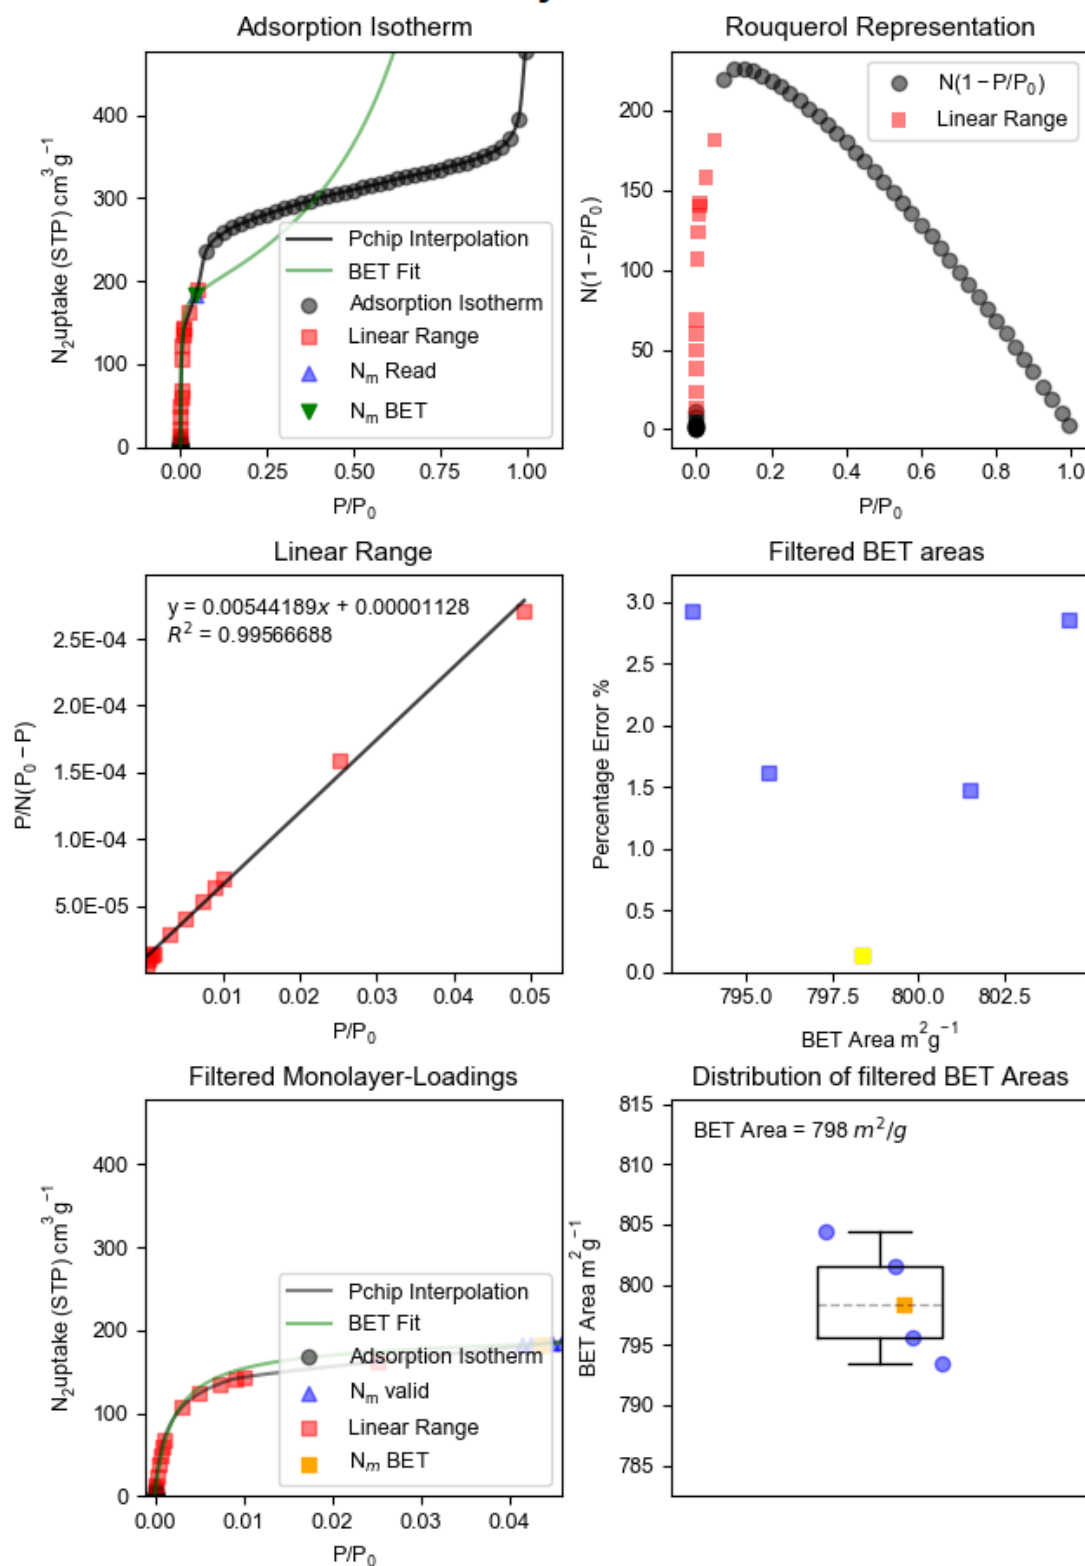

**Figure S22.** BET analysis of **DMCR-1** using the BETSI method.

## BETSI analysis for DMCR-1NH

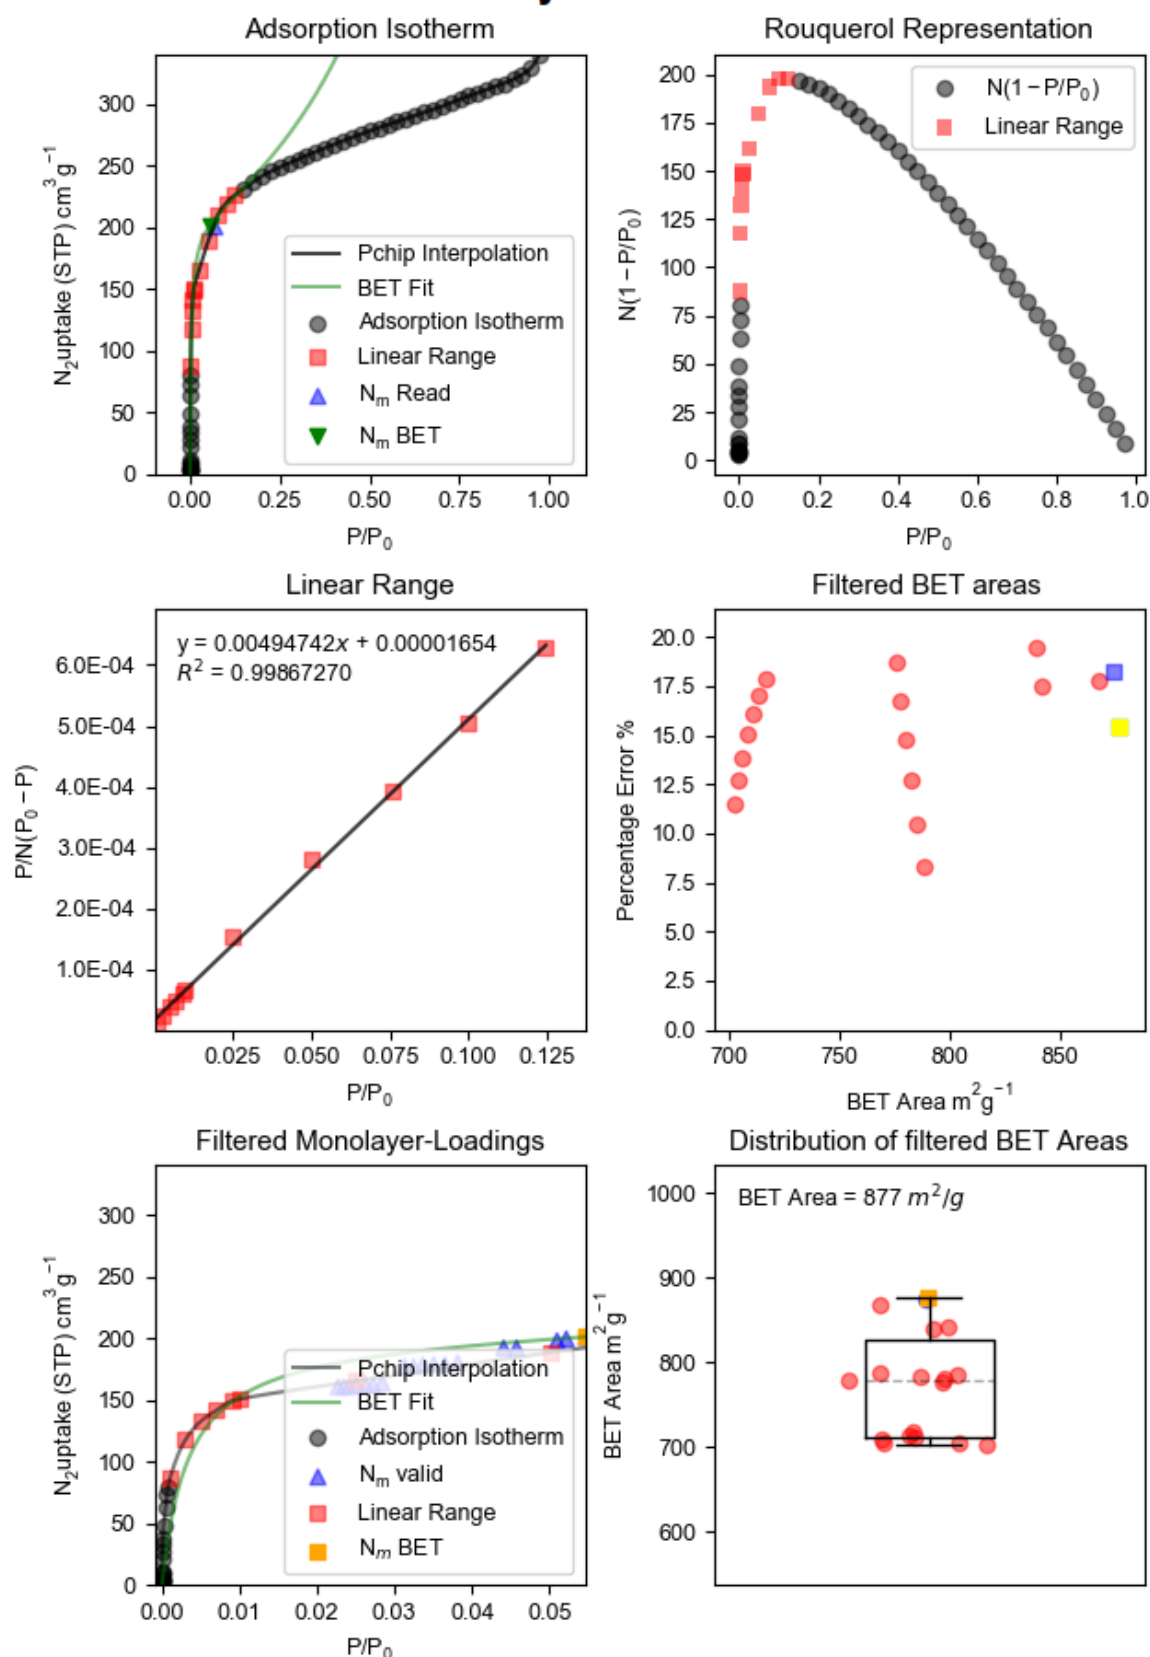

**Figure S23.** BET analysis of **DMCR-1NH** using the BETSI method.

## BETSI analysis for Imine-1

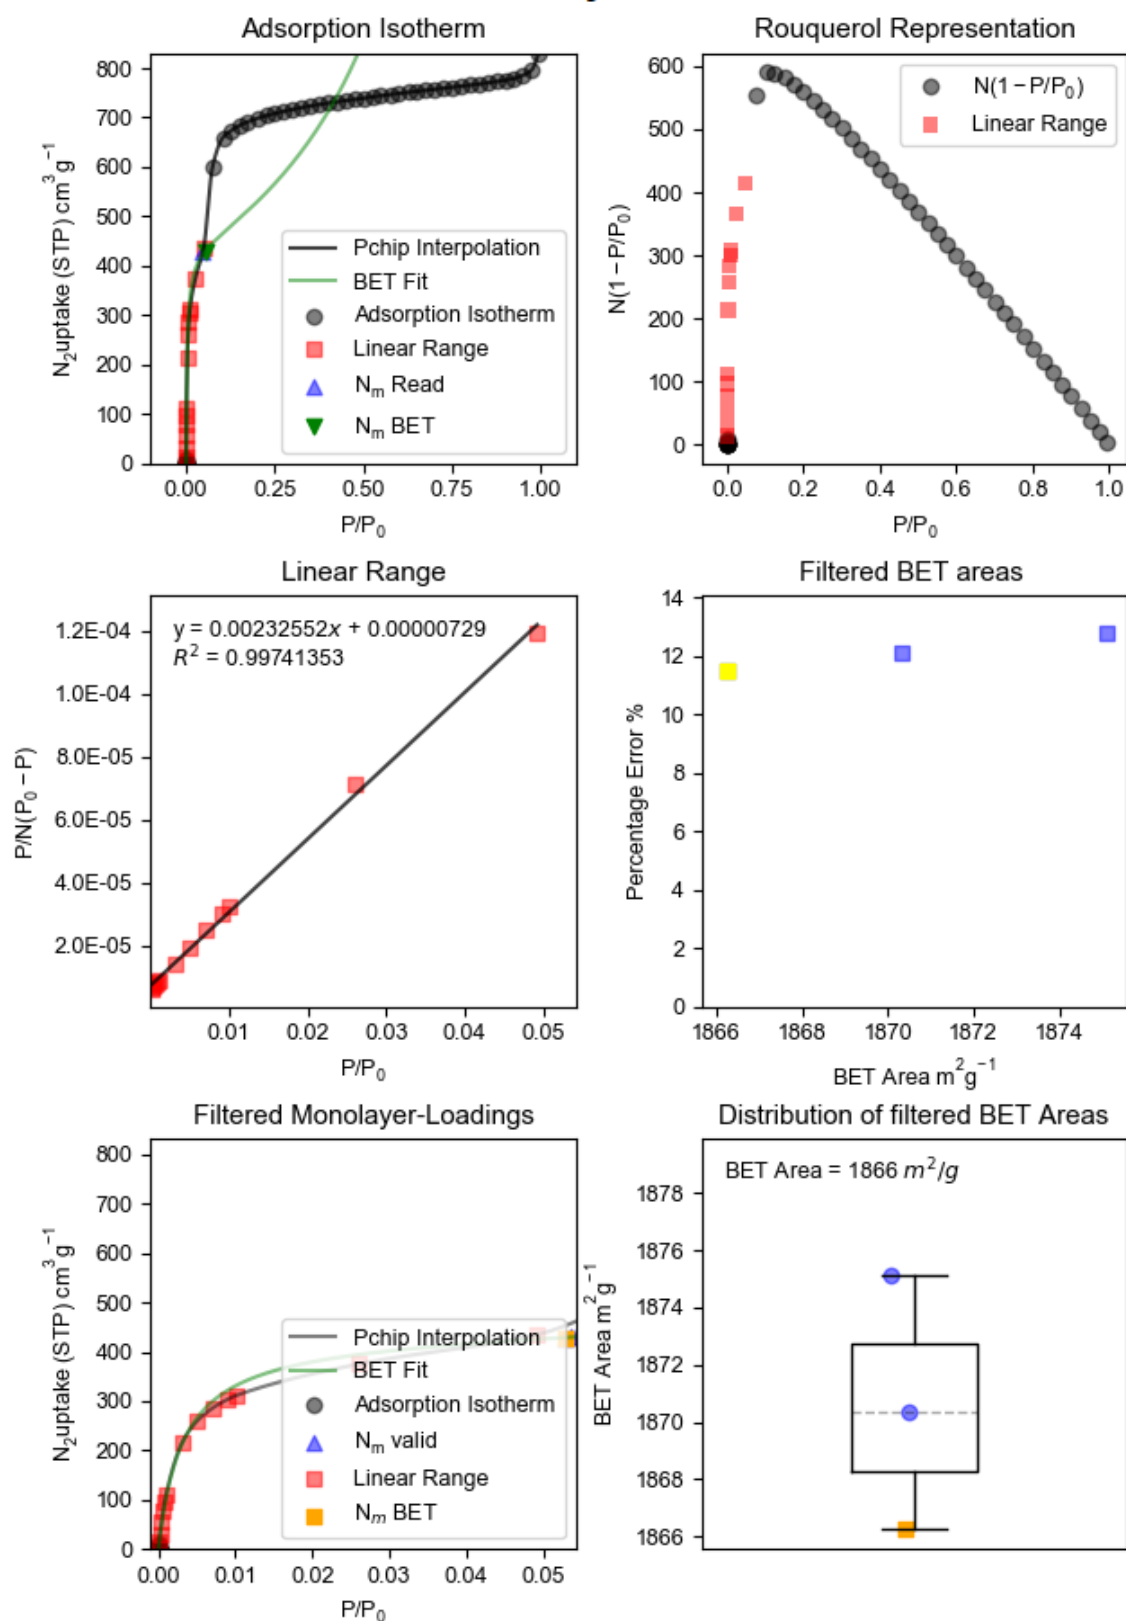

**Figure S24.** BET analysis of **Imine-1** using the BETSI method.

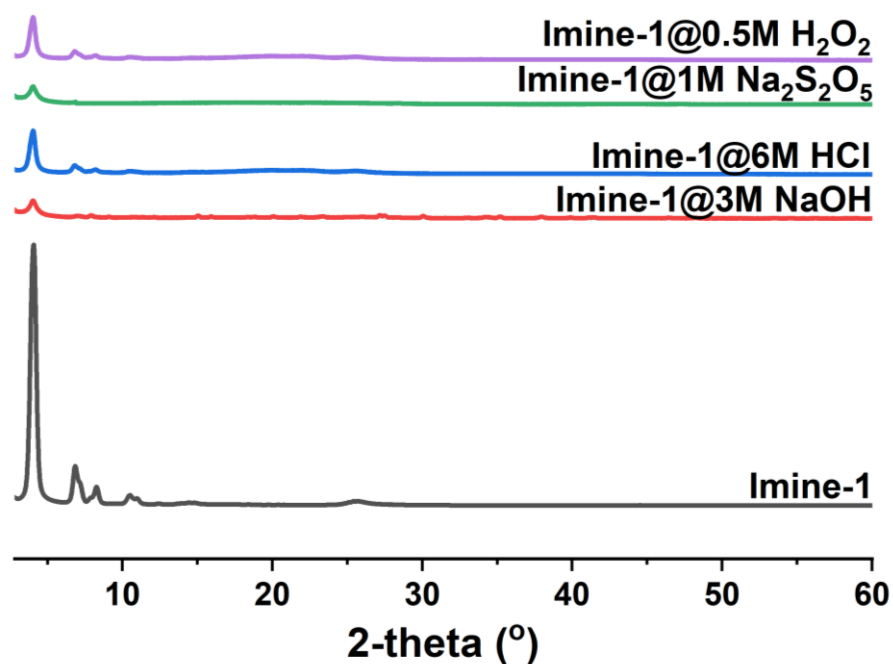

**Figure S25.** PXRD patterns collected for **Imine-1** after 1 day treatment with 6 M HCl, 3 M NaOH, 1 M Na<sub>2</sub>S<sub>2</sub>O<sub>5</sub> and 0.5 M H<sub>2</sub>O<sub>2</sub>.

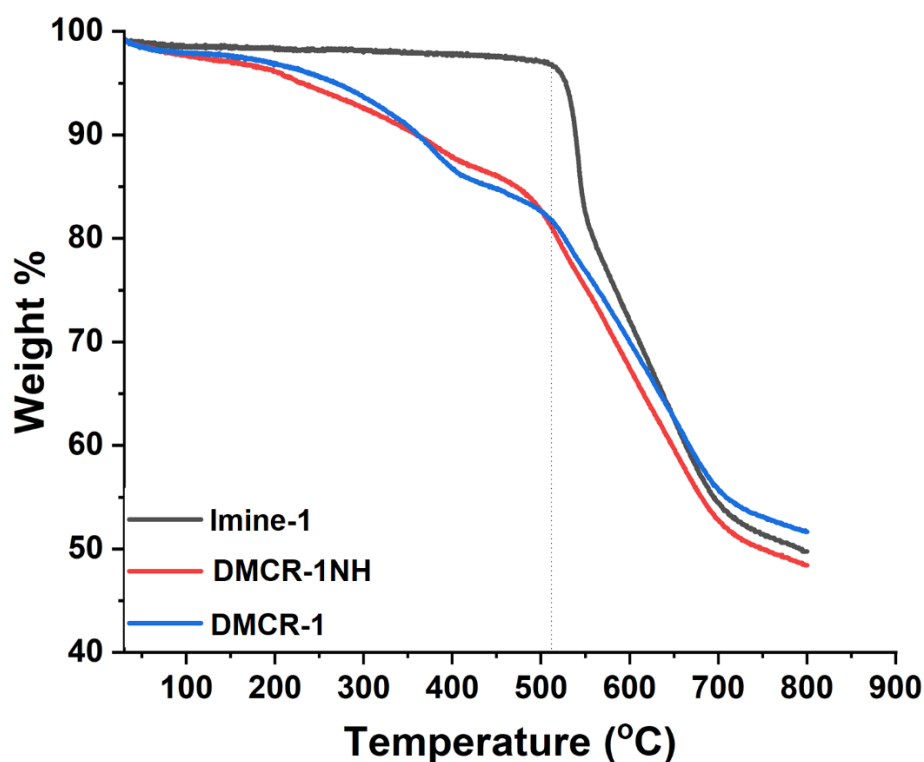

**Figure S26.** TGA of **DMCR** and **Imine** COFs. The weight loss from 150 to 400 °C corresponds to the decomposition of the -COOH groups, not present in the imine-COF.

## Section S5. UV-vis Spectra and Band Structure of COFs

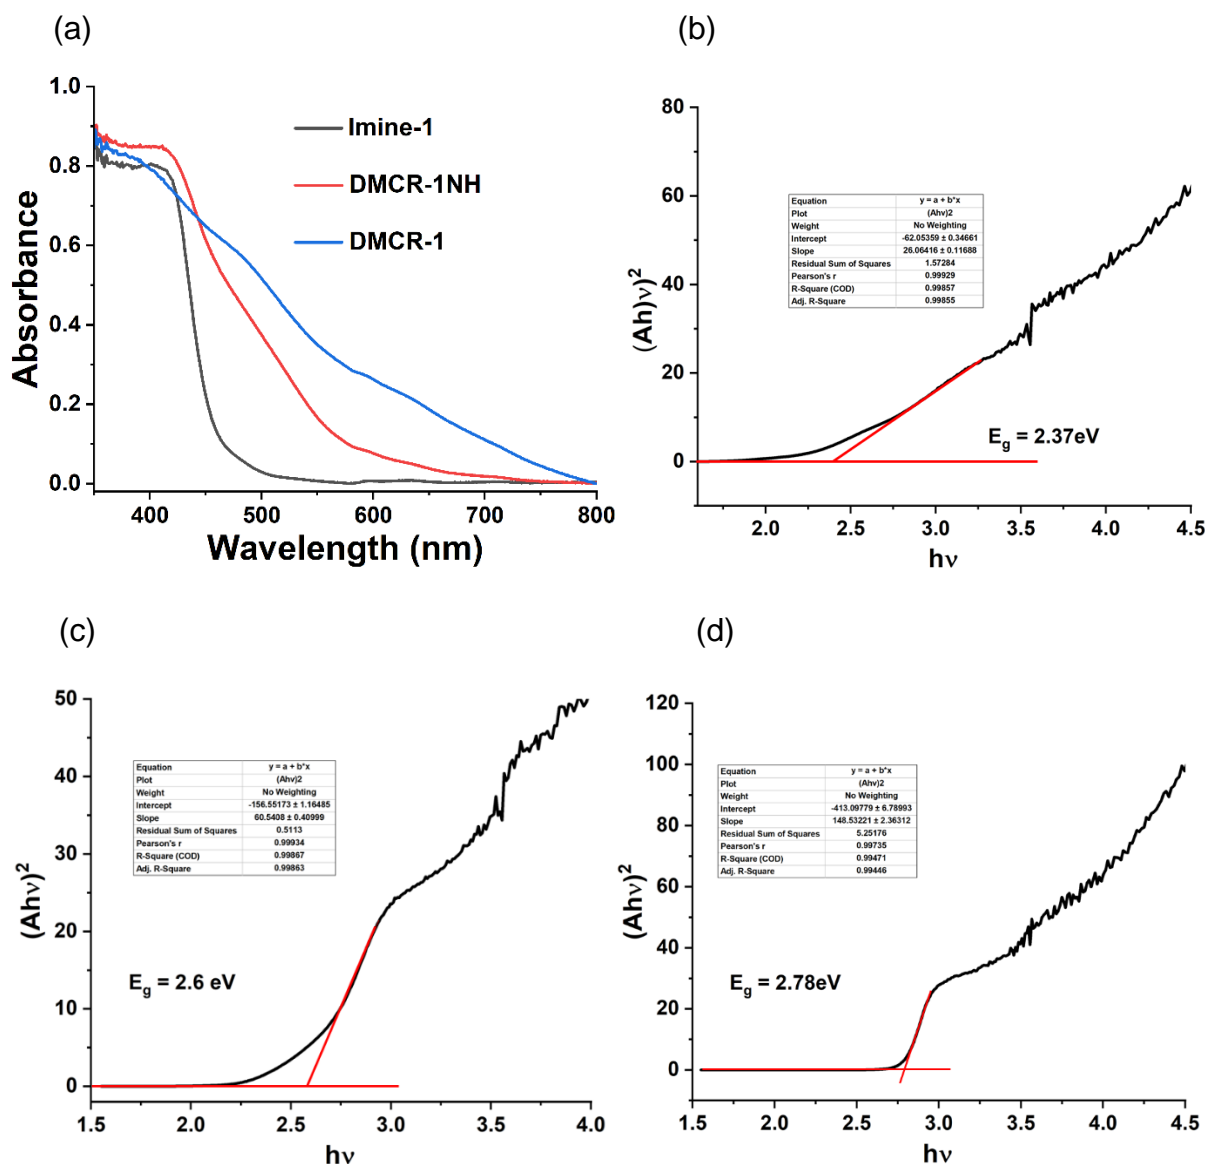

**Figure S27.** (a) Solid-state UV-vis spectra of **DMCR-1**, **DMCR-1NH** and **Imine-1**. Optical band gap calculation from the intersection of  $(\alpha h\nu)^2$  vs  $h\nu$  curve of (b) **DMCR-1**, (c) **DMCR-1NH** and (d) **Imine-1**.

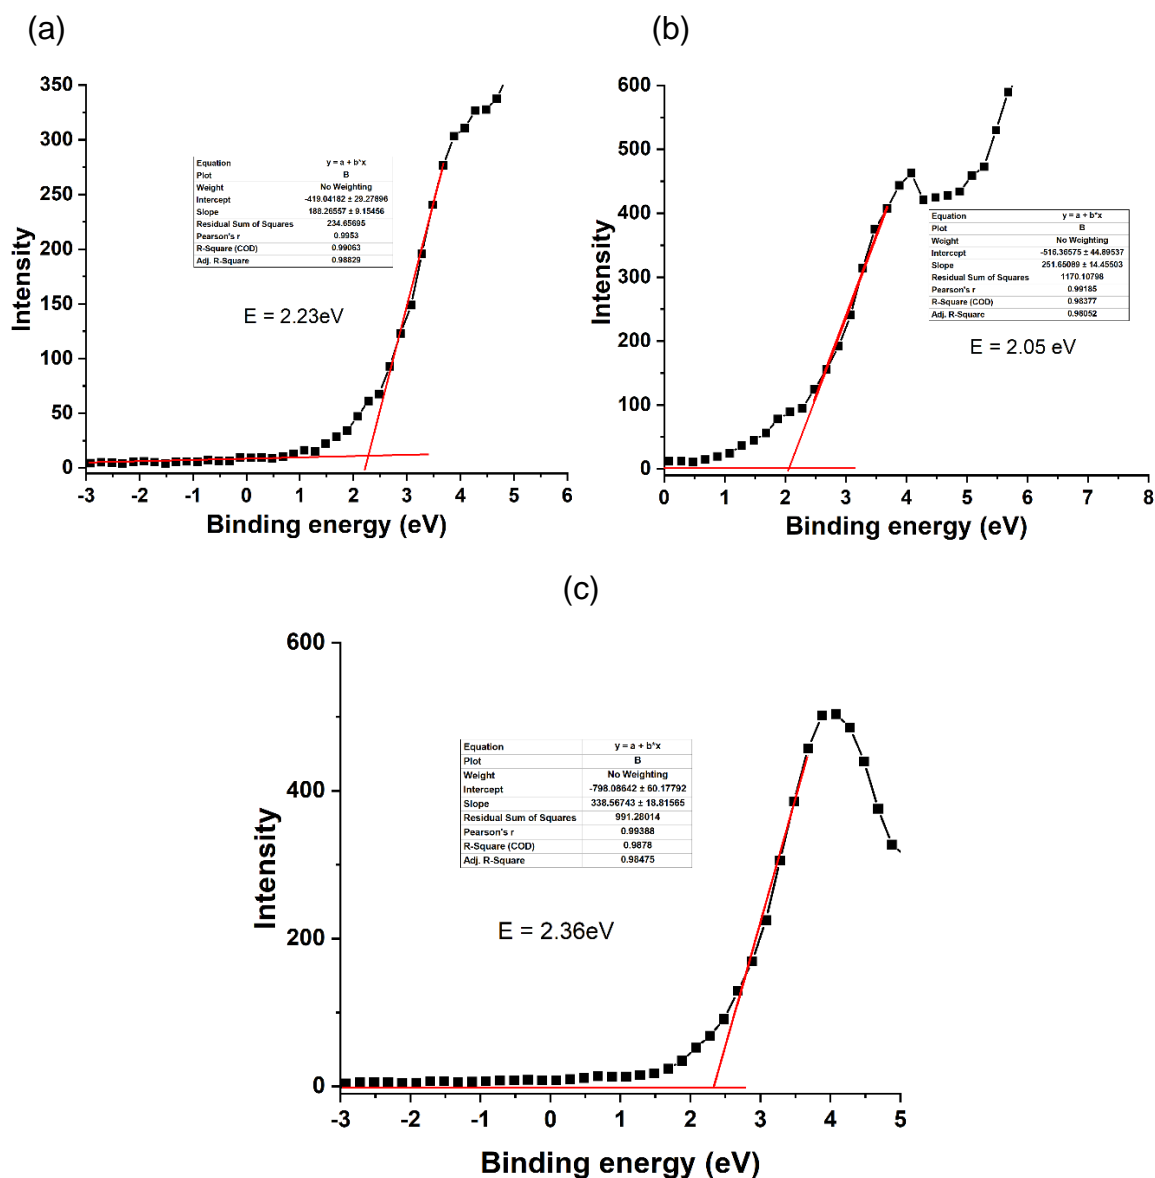

**Figure S28.** Valence band (VB) calculation from the VB XPS of (b) **DMCR-1**, (c) **DMCR-1NH** and (d) **Imine-1**.

### Calculation of Valence band energy ( $E_{VB}$ ) and conduction band energy ( $E_{CB}$ )

$$E_{CB} = E_{VB} + E_g$$

$$E_{VB} = -(\phi + VB_{xps})$$

$E_g$  is the band gap derived from the UV-vis spectra,  $\phi$  is the electron work function of the analyser (4.35 eV) and  $VB_{xps}$  is derived from valence band XPS spectra.

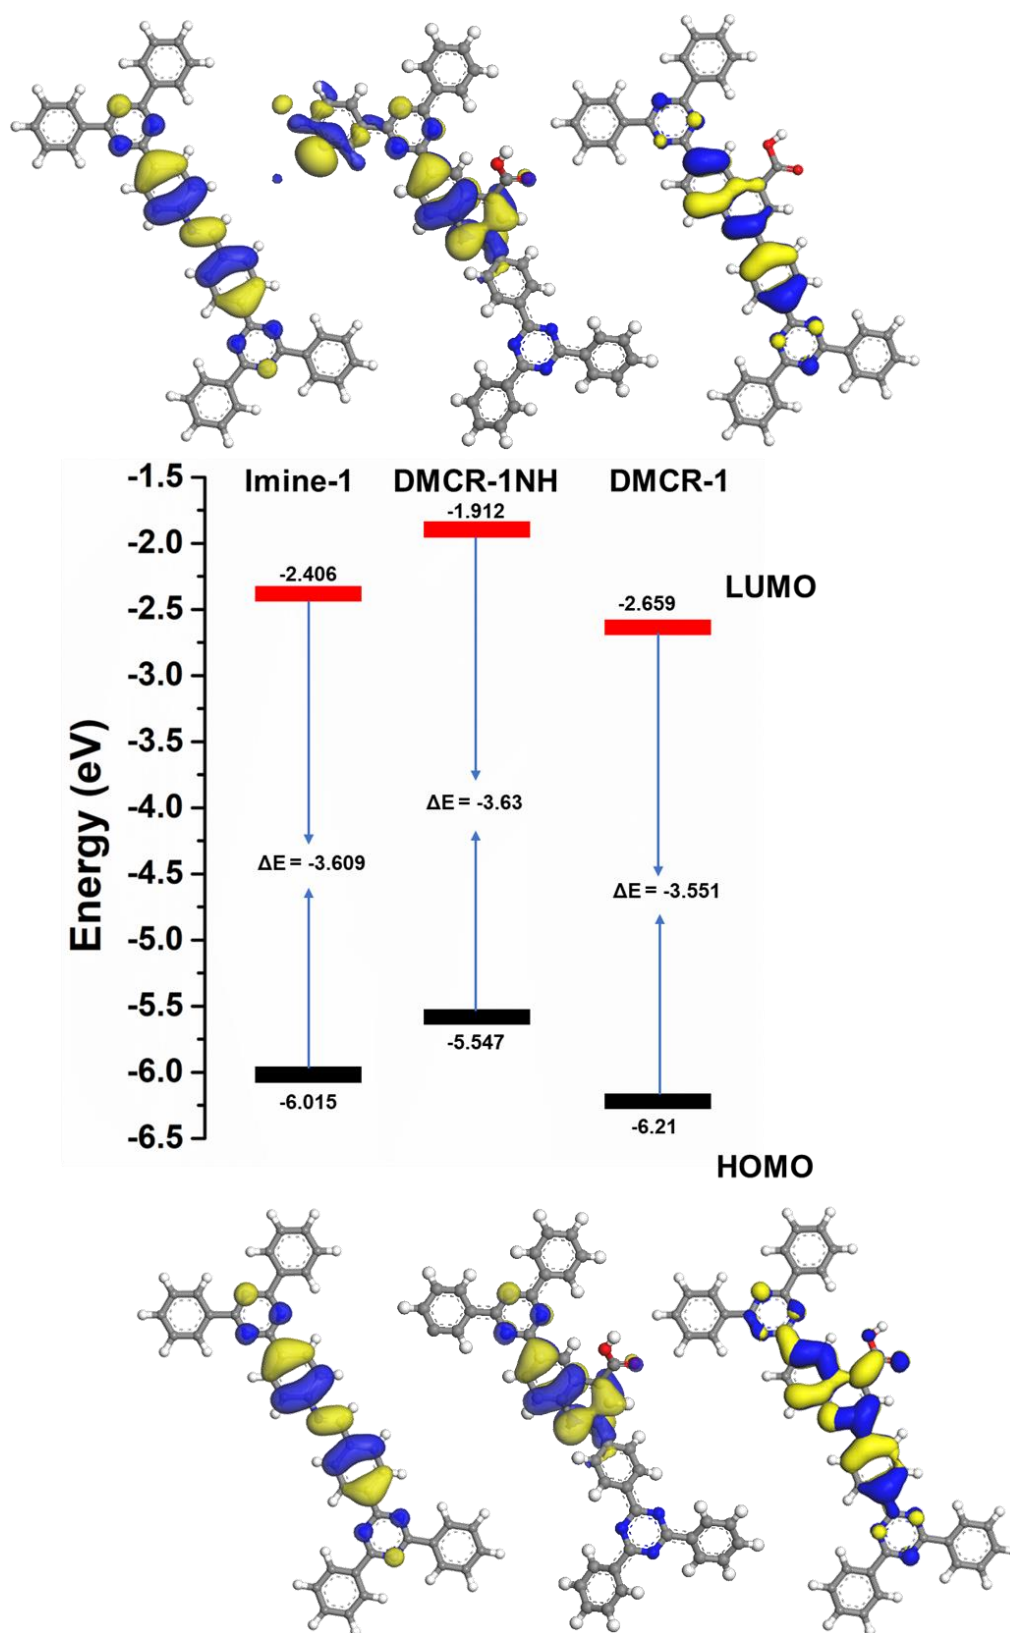

**Figure S29.** HOMO-LUMO energy profile calculated using the DFT method (basis set B3LYP/6-31G+(d)) showing frontier molecular orbital distribution of fragmented COFs.

## Section 6. Photocatalytic Experiments

### High-throughput Photocatalytic H<sub>2</sub>O<sub>2</sub> Production Experiment

A sample vial was charged with COF powder (10 mg) in water (20 mL) without or with a sacrificial reagent (IPA, EtOH, BA or TBA) (2 mL), and then ultrasonicated for 10-15 min (to disperse the COF) after being capped under air. For oxygen atmosphere, the flask was purged for 10 min in each case. The photocatalytic H<sub>2</sub>O<sub>2</sub> evolution experiments were performed on an Oriel Solar Simulator 300 W Xe lamp (L.O.T-Quantum design) with appropriate filters (420 nm). After 1h or 3h, 0.2 mL solution was taken by a syringe. The amount of H<sub>2</sub>O<sub>2</sub> produced was analysed with Peroxide test sticks (HANNA Instruments, HI3844).

### Photocatalytic Conversion Efficiency

**AQY Measurement:** The apparent quantum yield (AQY) was determined under monochromatic LED light irradiation at a certain wavelength ( $\lambda$  = 400 nm, 420 nm, 460 nm, 490 nm, 550 nm, and 600 nm), and the light intensity was measured by a ThorLabs PM100D Power with a photodiode sensor. The AQY was calculated using the following equation:

$$\text{AQY\%} = \frac{[H_2O_2 \text{ produce (mol)}] \times 2}{\text{Photon number entered into the reactor (mol)}} \times 100$$
$$= \frac{[N_a \times h \times c] \times [H_2O_2 \text{ produce (mol)}] \times 2}{I \times S \times t \times \lambda} \times 100$$

Where, ***N<sub>a</sub>*** is Avogadro's constant ( $6.022 \times 10^{23} \text{ mol}^{-1}$ ), ***h*** is the Planck constant ( $6.626 \times 10^{-34} \text{ Js}$ ), ***c*** is the speed of light ( $3 \times 10^8 \text{ ms}^{-1}$ ), ***S*** is the irradiation area ( $\text{cm}^2$ ), ***I*** is the intensity of irradiation light ( $\text{Wcm}^{-2}$ ), ***t*** is the photoreaction time (s), ***λ*** is the wavelength of the monochromatic light (m).

### Electron Paramagnetic Resonance Measurements

Spin trapping electron paramagnetic resonance (EPR) measurements were performed using a an ESR spectrometer (Bruker-BioSpin, EMXmicro). 5,5-dimethyl-1-pyrroline N-oxide (DMPO) were used as a spin-trapping reagent to detect radicals. The measurements were carried out in a H<sub>2</sub>O/MeOH (1:9, 500  $\mu\text{L}$ ): mixture with 2 mg of COFs and 0.1 mmol DMPO, a Xe lamp with a filter ( $\lambda > 420 \text{ nm}$ ) was applied as the light source.



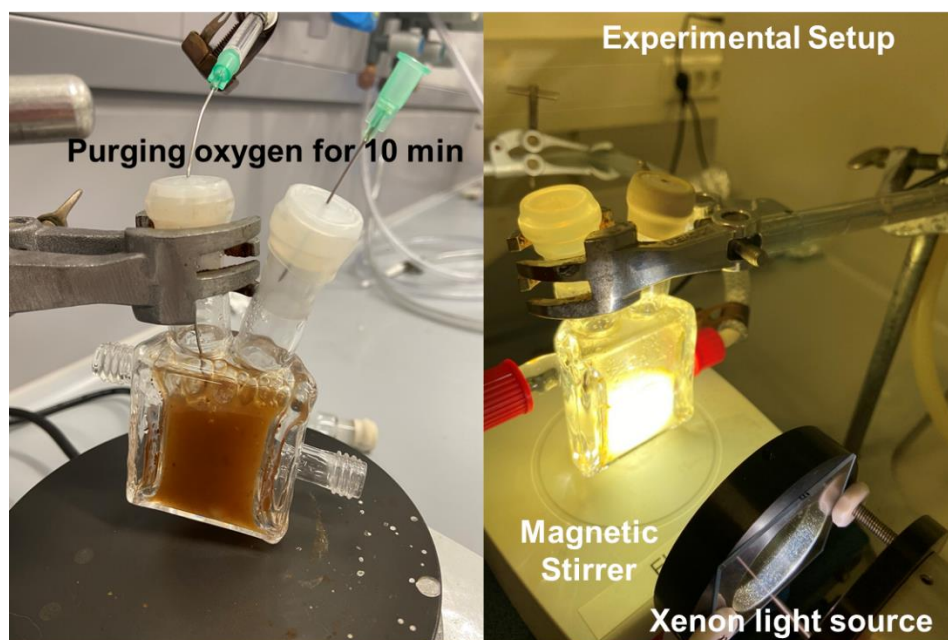

**Figure S30.** Experimental setup for photocatalytic  $\text{H}_2\text{O}_2$  formation: (left:  $\text{O}_2$  purging.; right: experiment on progress).

**Typical Xenon spectra of ozone free lamp**

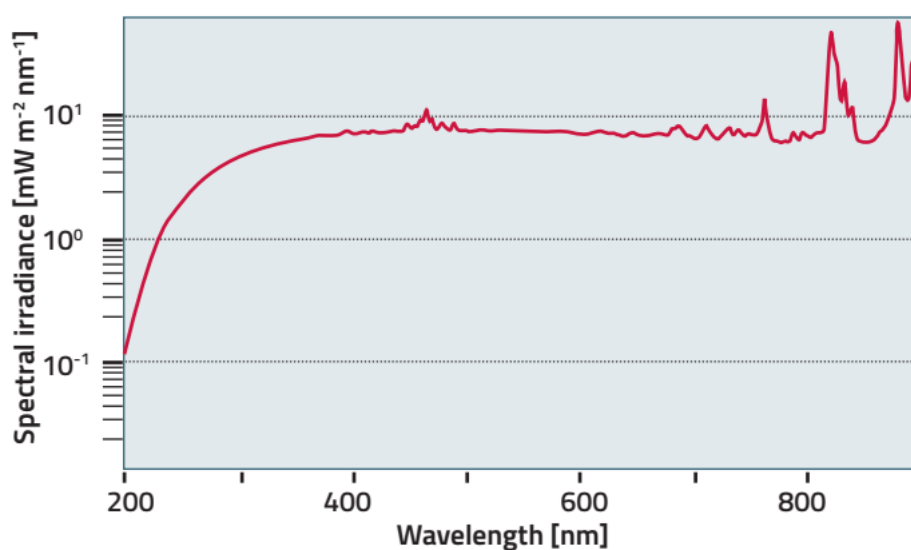

**Figure S31.** Xenon lamp light spectra used for this experiment.

[https://qdeurope.com/fileadmin/Mediapool/products/lightsources/en/Xenon\\_arc\\_light\\_sources\\_300\\_W.pdf](https://qdeurope.com/fileadmin/Mediapool/products/lightsources/en/Xenon_arc_light_sources_300_W.pdf)

[https://qdeurope.com/fileadmin/Mediapool/products/lightsources/en/Lamp\\_spectra\\_and\\_irradiance.pdf](https://qdeurope.com/fileadmin/Mediapool/products/lightsources/en/Lamp_spectra_and_irradiance.pdf)

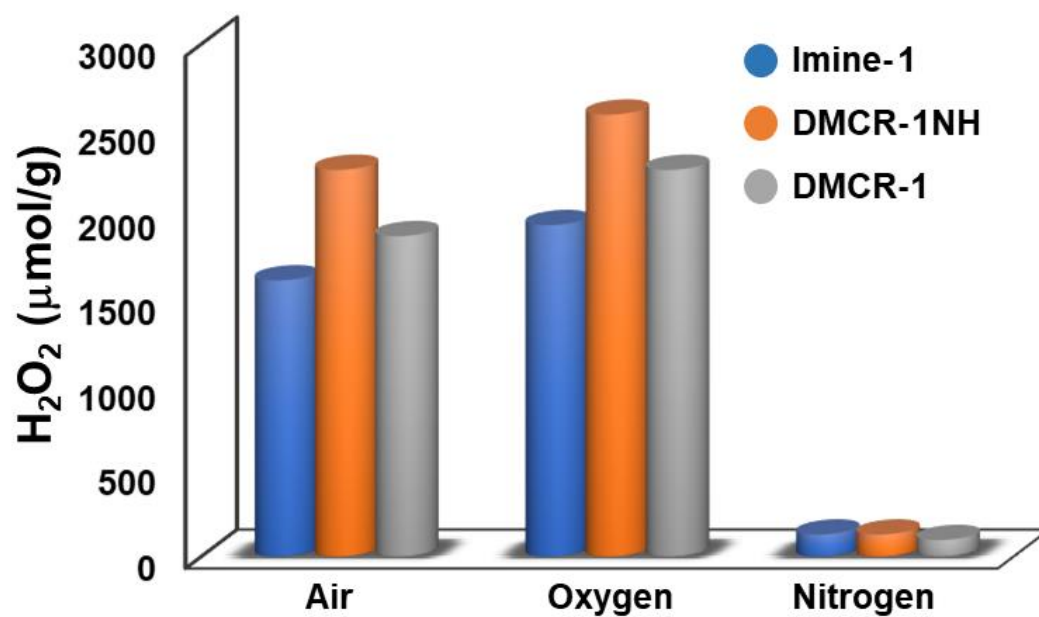

**Figure S32.** Photochemical H<sub>2</sub>O<sub>2</sub> production under different gas atmosphere (5 mg of COFs in 11 mL water, 1 h at 25 °C and  $\lambda = 420$  nm).

### Photocurrent Measurement.

Photocurrent measurements are performed with a three-electrode set-up from Metrohm (Autolab PGSTAT302N), using a Pt counter electrode, an Ag/AgCl (3 M NaCl) reference electrode and NaSO<sub>4</sub> (2 M in water) as electrolyte. The working electrode was fabricated by mixing under sonication 5 mg COFs with water, ethanol (50  $\mu$ L each) and 1 wt% Nafion solution for 30 mins. Then, 2  $\mu$ L of the suspension was drop-casted onto 0.25 cm<sup>2</sup> of a FTO substrate and dried under ambient conditions. Spare FTO surface was covered with an isolating paint. Photocurrent measurements were performed at 1 V bias under periodical illumination from the back (40 s intervals, visible light, 1 W m<sup>-2</sup>).

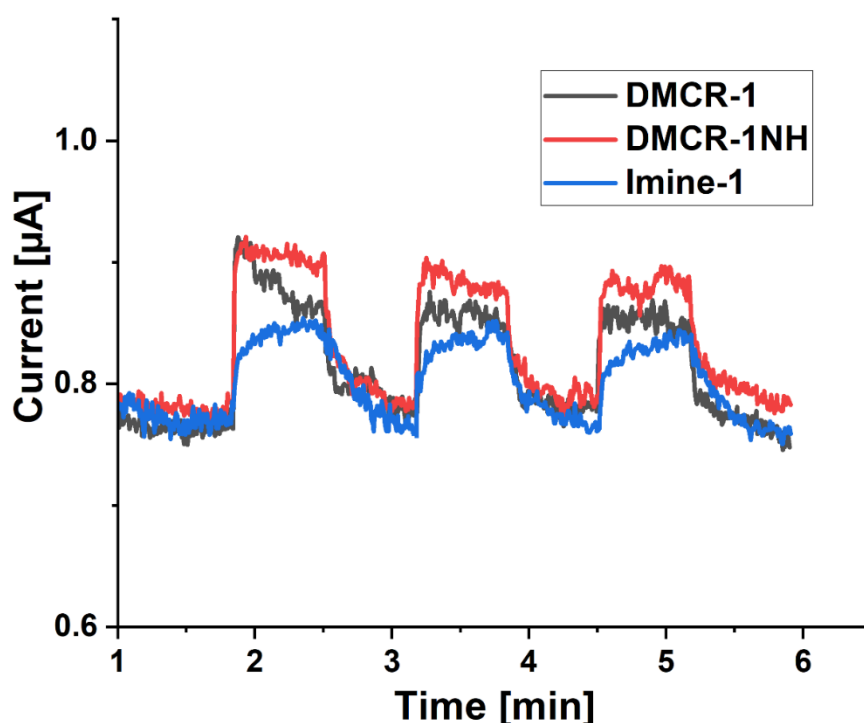

**Figure S33.** Photocurrent spectra of **DMCR-1**, **DMCR-1NH**, **Imine-1** with and without visible light irradiation.

### Solid-State Electron Paramagnetic Resonance Spectroscopy (EPR)

EPR measurements in X-band (microwave frequency  $\approx 9.87$  GHz) were performed at 293 K by a Bruker EMX CW micro spectrometer equipped with an ER 4119HS-WI high-sensitivity optical resonator with a grid on the front side. The samples were illuminated by a 300 W Xe lamp with a 420 nm cut-off filter (LOT Oriel). All the samples were measured under the same conditions (microwave power: 6.74 mW, modulation frequency: 100 kHz, modulation amplitude: 3 G, Sweep time: 45 s).  $g$  values have been calculated from the resonance field  $B_0$  and the resonance frequency  $\nu$  using the resonance condition  $h\nu = g\beta B_0$ . The calibration of the 3  $g$  values was performed using DPPH (2, 2-diphenyl-1-picrylhydrazyl) ( $g = 2.0036 \pm 0.00004$ ).

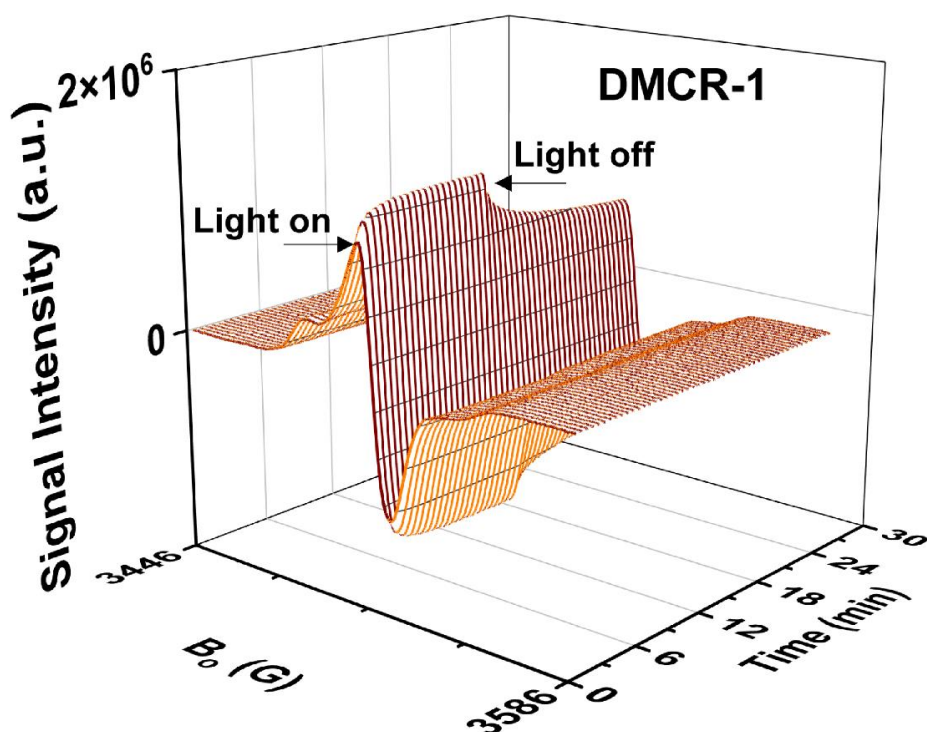

**Figure S34.** Electron paramagnetic resonance (EPR) conduction band (CB) electrons spectra of **DMCR-1** with and without visible light irradiation ( $>420$  nm, 300 W Xe lamp).

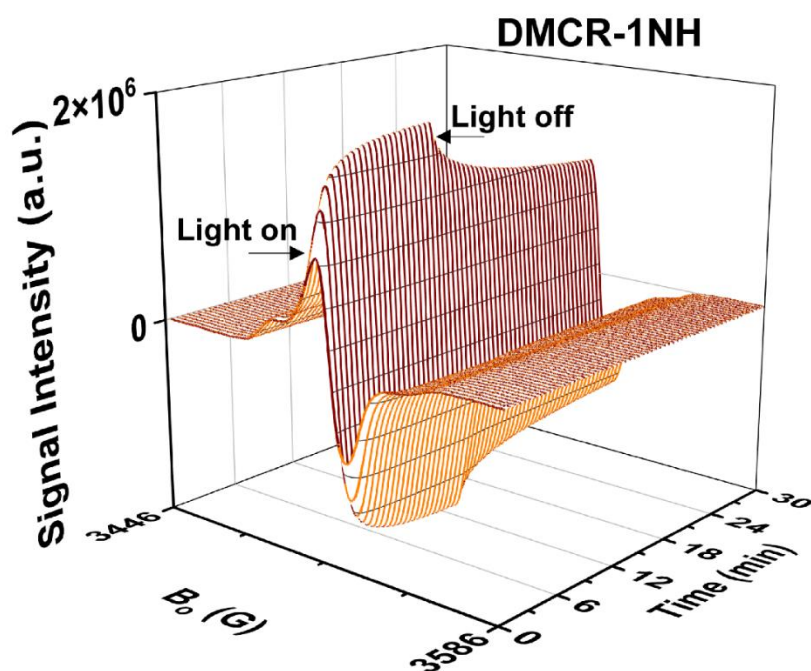

**Figure S35.** Electron paramagnetic resonance (EPR) conduction band (CB) electrons spectra of **DMCR-1NH** with and without visible light irradiation (>420 nm, 300 W Xe lamp).

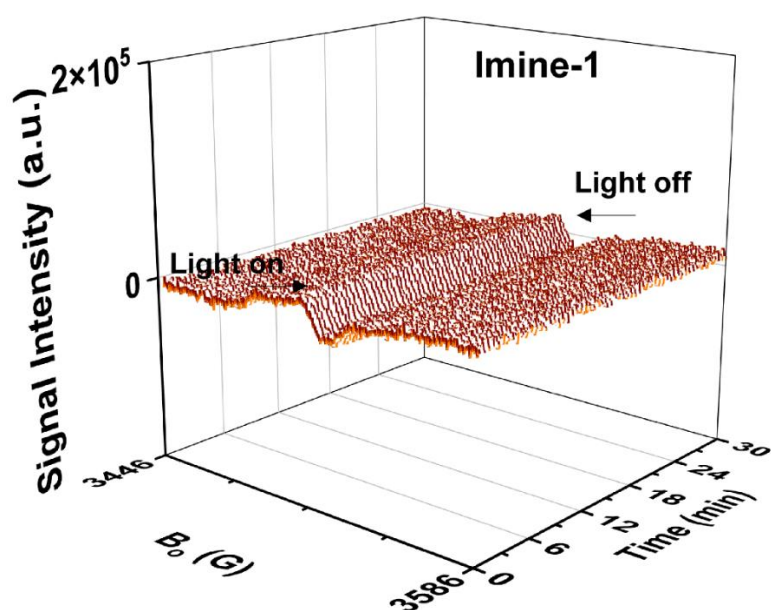

**Figure S36.** Electron paramagnetic resonance (EPR) conduction band (CB) electrons spectra of **Imine-1** with and without visible light irradiation (>420 nm, 300 W Xe lamp).

## Section 7. Configurational Bias Monte Carlo simulation

### Configurational Bias Monte Carlo (CBMC) molecular simulation:

The structures of **DMCR-1**, **DMCR-1NH** and **Imine-1** was assumed to be rigid in the crystallographic position, which is obtained from Pawley refinement PXRD data. The simulation boxes representing **DMCR-1**, **DMCR-1NH** and **Imine-1** adsorbent consist of (1 x 1 x 1) unit cells for O<sub>2</sub>. All the calculations were performed at 298 K. Interatomic interactions were modeled with standard Lennard-Jones potential and Columbic potentials. Lennard-Jones parameters between unlike atom types were computed using the Lorentz-Berthelot mixing rules. The pairwise interactions between host guest atoms of the particular force field, nonbonding parameter has been utilized. The long-range part of electrostatic interactions was handled using the Ewald summation technique with a relative precision of 10<sup>-6</sup>. Periodic boundary conditions were applied in all three dimensions. For each state point, the CBMC simulation consists of 1 x 10<sup>7</sup> steps to guarantee equilibration, followed by 1 x 10<sup>7</sup> steps to sample the desired thermodynamic properties.

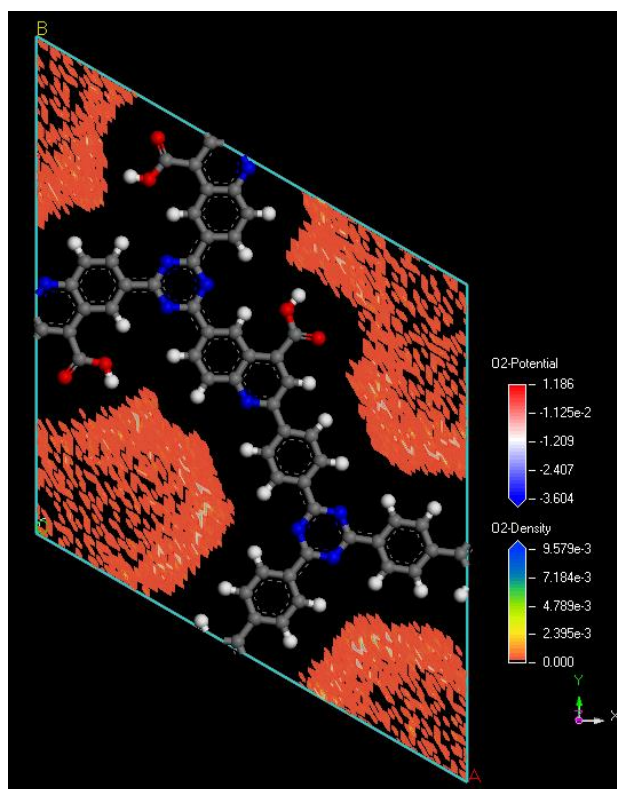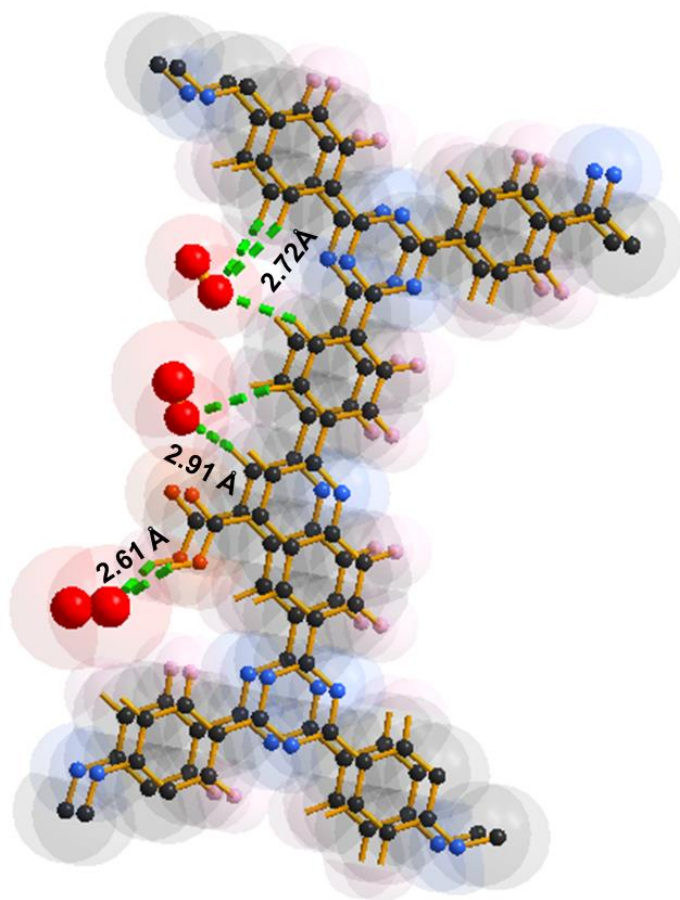

**Figure S37.** CBMC molecular simulation: adsorption position and probability distribution plot of  $O_2$  at 1 bar in **DMCR-1**.



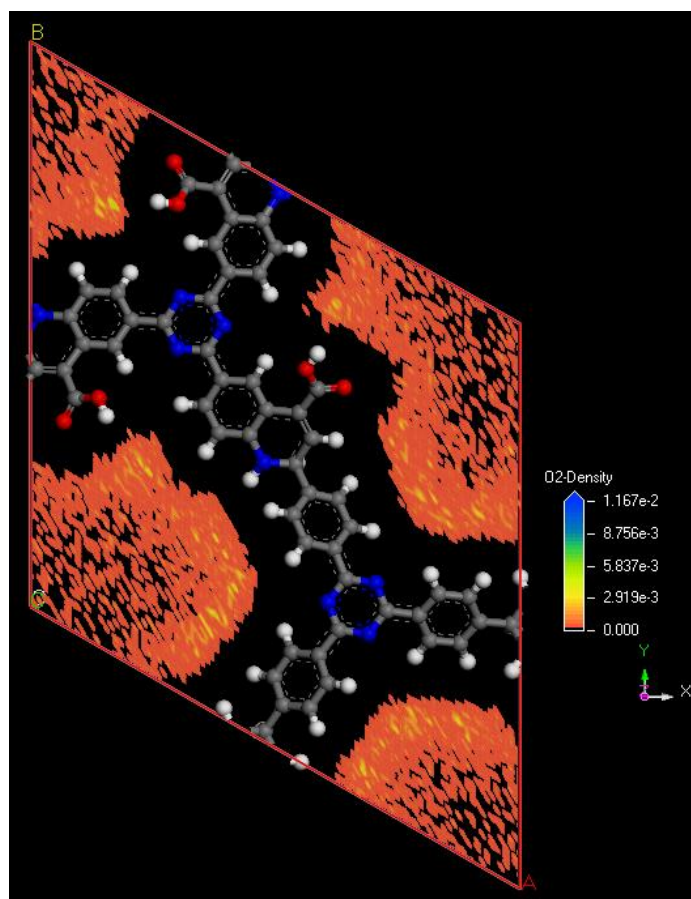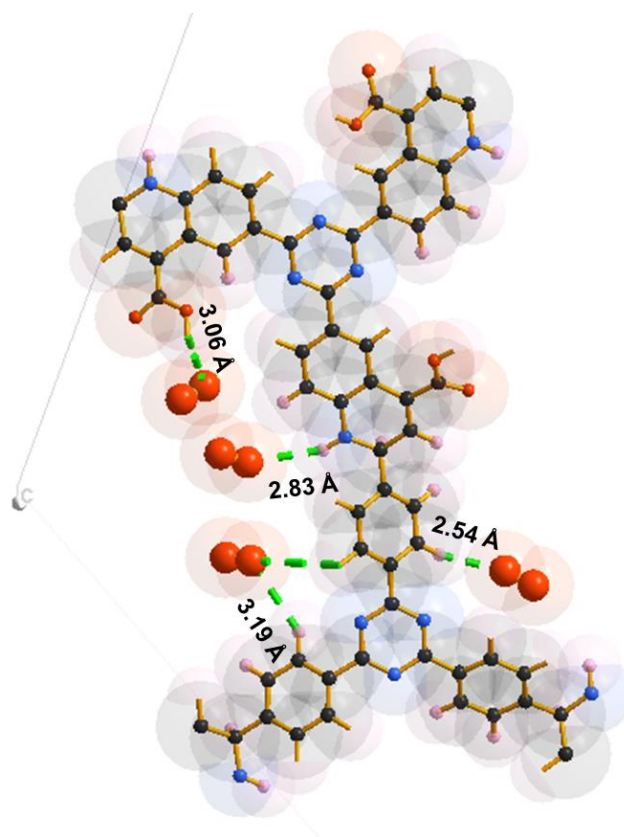

**Figure S38.** CBMC molecular simulation: adsorption position and probability distribution plot of O<sub>2</sub> at 1 bar in **DMCR-1NH**.



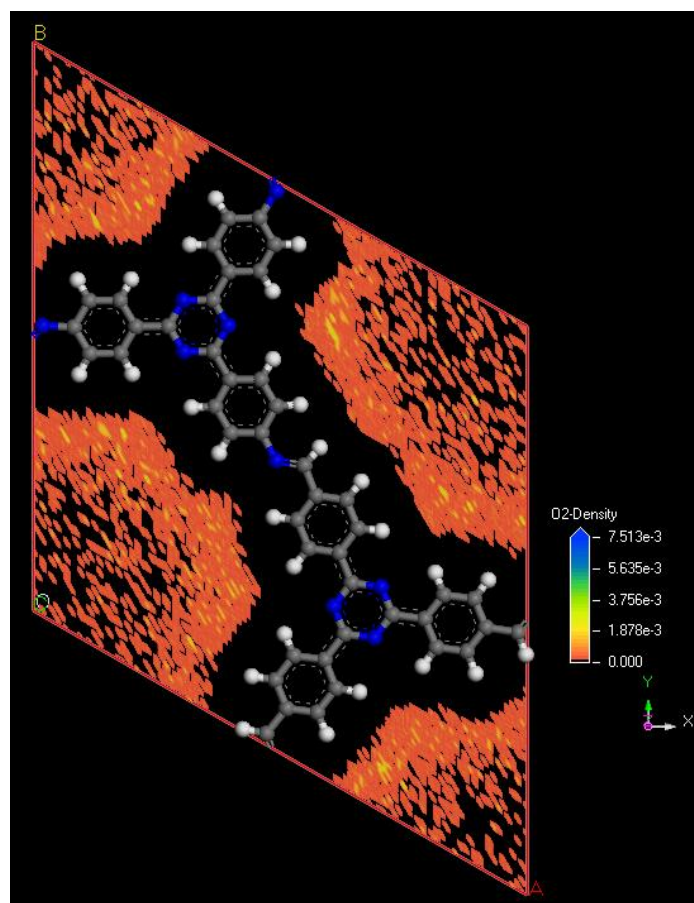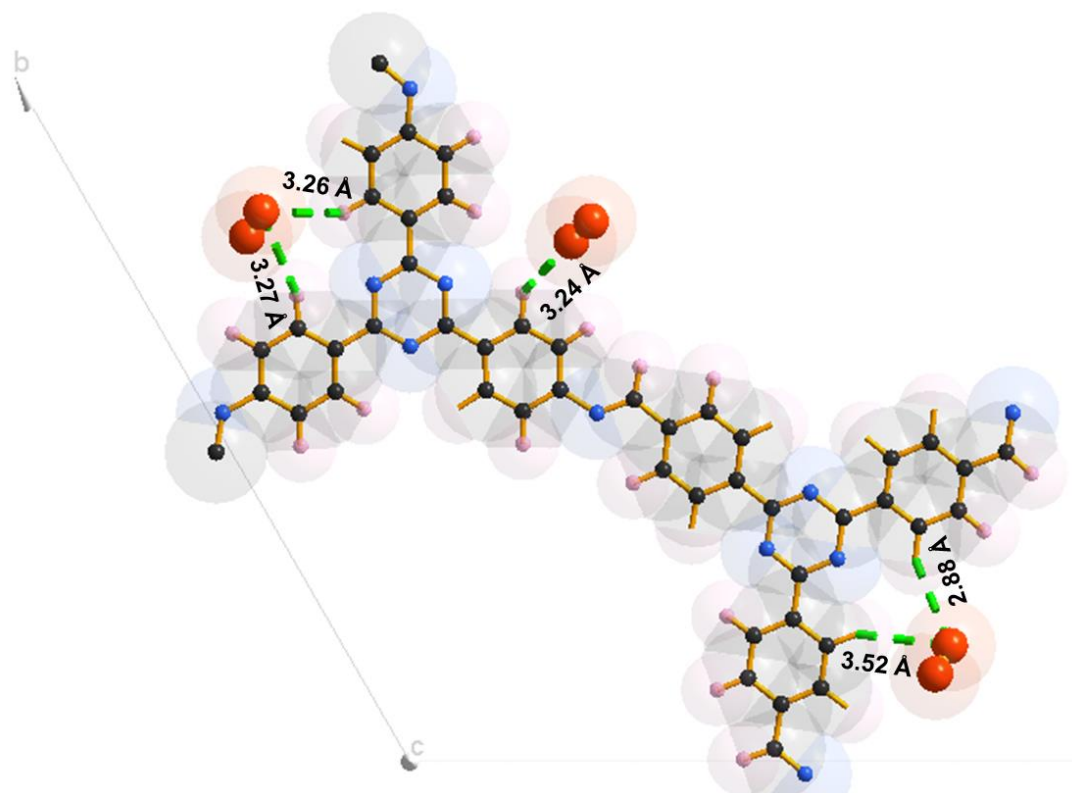

**Figure S39.** CBMC molecular simulation: adsorption position and probability distribution plot of O<sub>2</sub> at 1 bar in **Imine-1**.

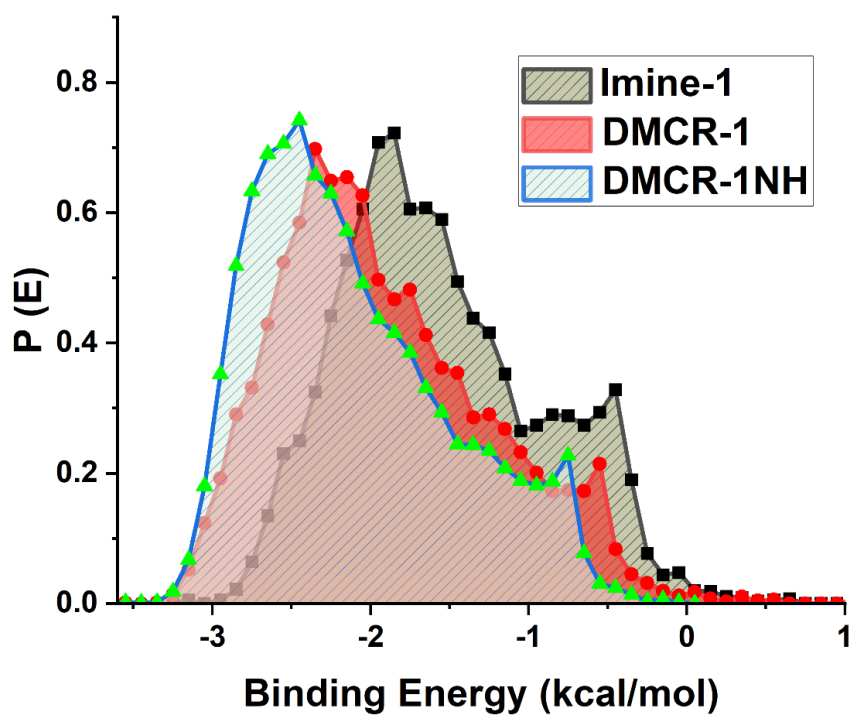

**Figure S40.** Binding energy of  $O_2$  in presence of **DMCR-1**, **DMCR-1NH** and **Imine-1**.

## Section 9. Photocatalytic Experiments

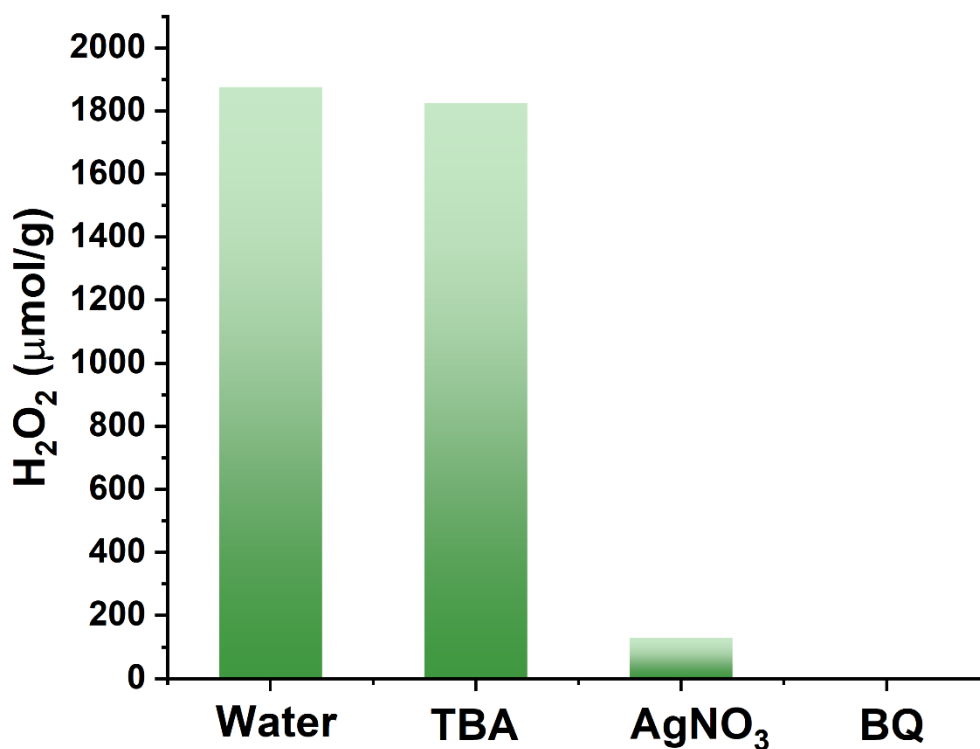

**Figure S41.** Photocatalytic H<sub>2</sub>O<sub>2</sub> production for **DMCR-1** in neat water, with benzoquinone (BQ), *tert*-butyl alcohol (TBA) and AgNO<sub>3</sub> (5 mL 10 mM aqueous solution, 10 mg COF), all with 1 h illumination (Oriel Solar Simulator 300 W Xe lamp). AgNO<sub>3</sub>, *tert*-butyl alcohol (TBA), and benzoquinone (BQ) act as electron (e<sup>-</sup>), hydroxyl radical (·OH), and superoxide radical (·O<sub>2</sub><sup>-</sup>) scavengers.

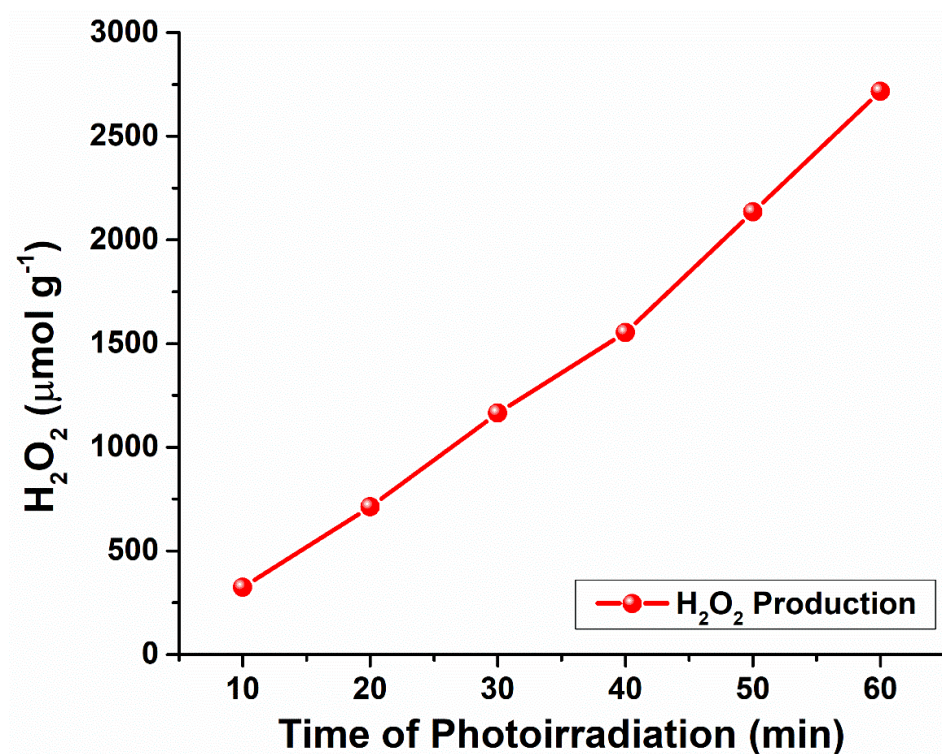

**Figure S42.** Time dependent H<sub>2</sub>O<sub>2</sub> formation in water:IPA (10:1) for **DMCR-1NH** (5 mg of COF at 25 °C and  $\lambda = 420$  nm).

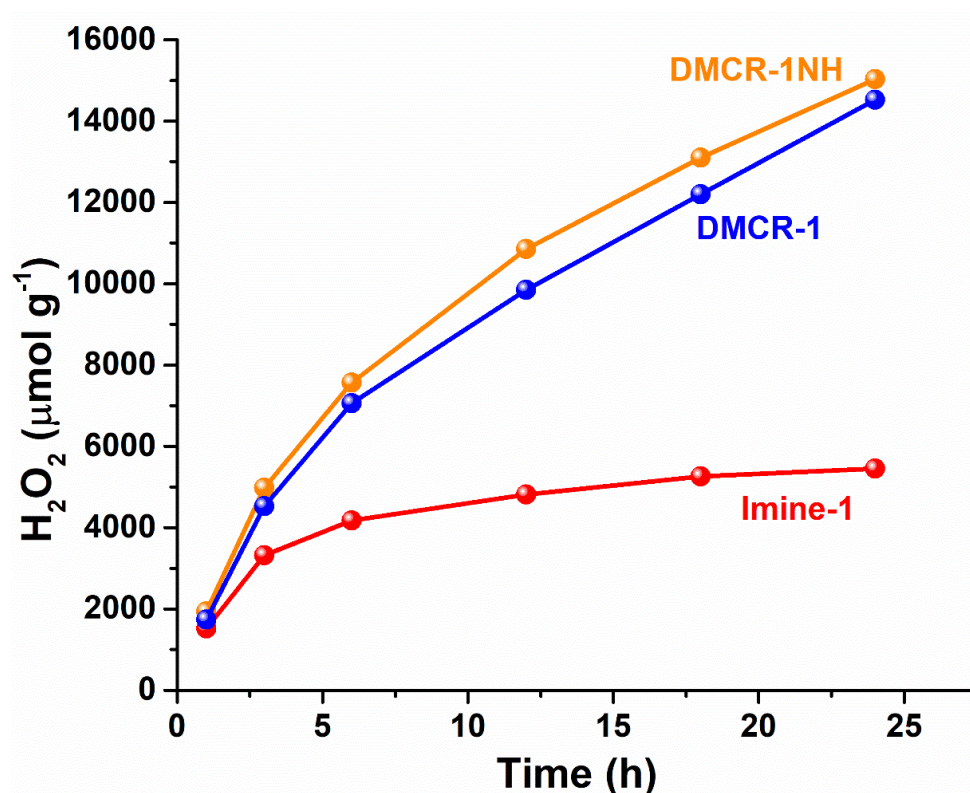

**Figure S43.** Time dependent long-term H<sub>2</sub>O<sub>2</sub> formation in water:IPA (20:2) (10 mg of COFs at 25 °C and  $\lambda = 420$  nm).

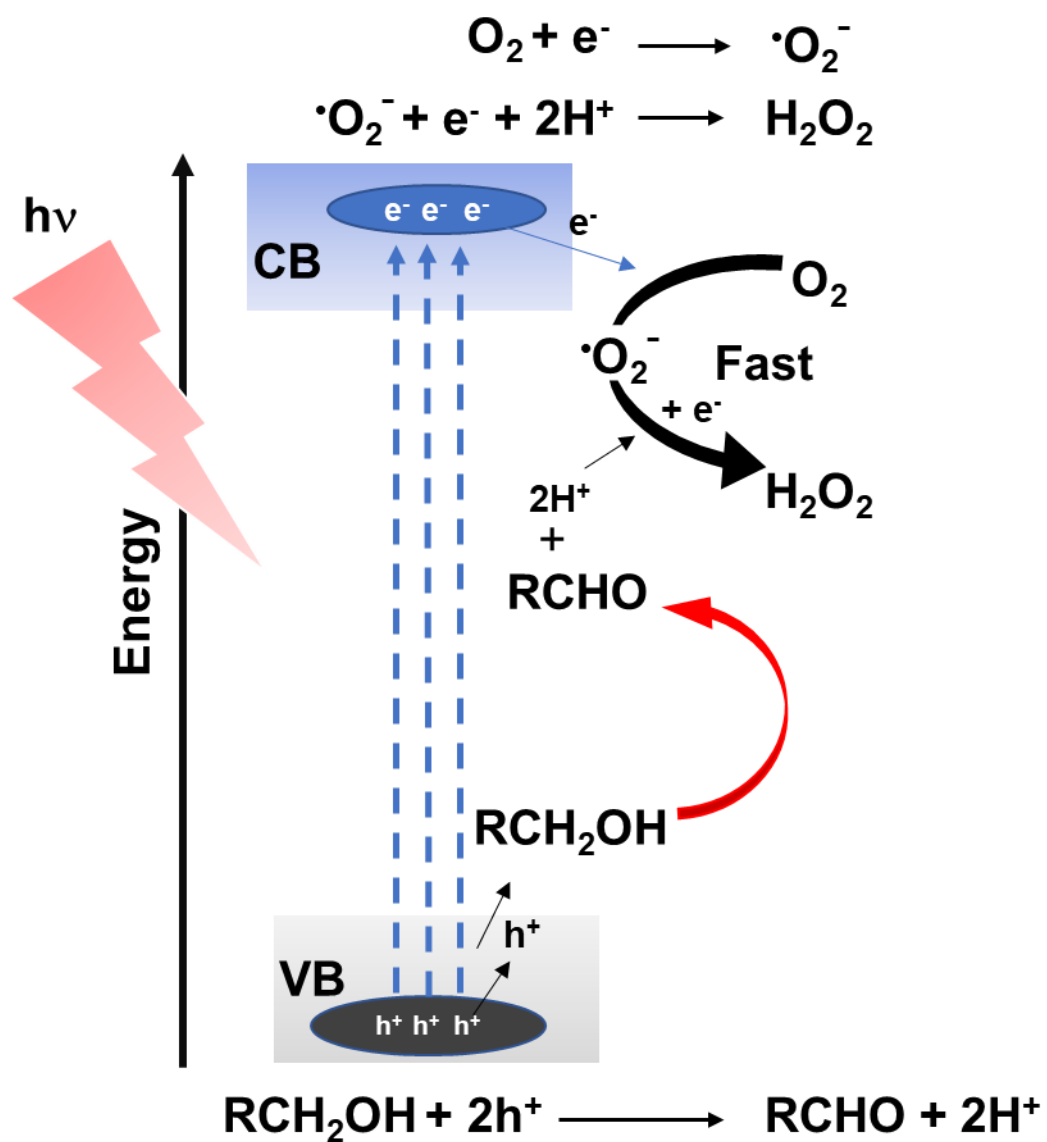

**Figure S44.** Proposed mechanism of  $\text{H}_2\text{O}_2$  formation using COFs as photocatalyst.

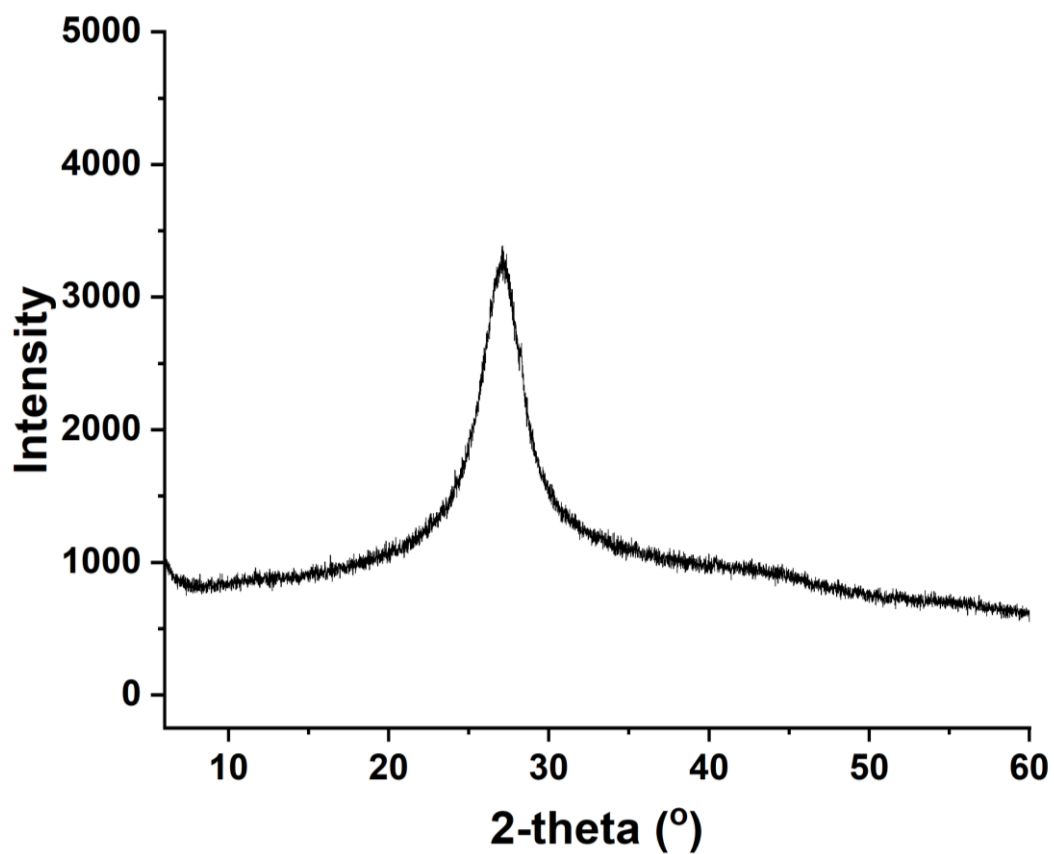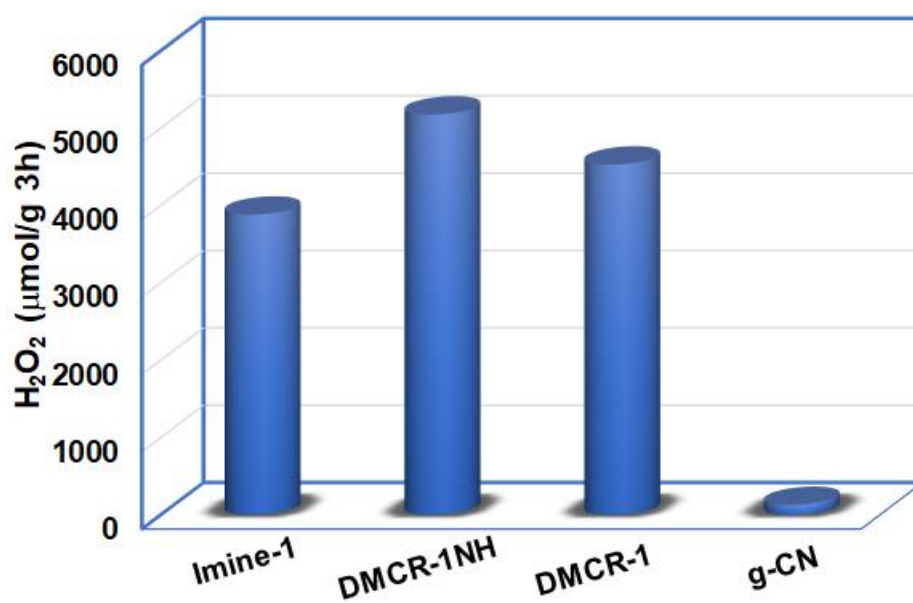

**Figure S45.** (Top) Experimental PXRD pattern of **g-CN**. (Bottom) Comparison of H<sub>2</sub>O<sub>2</sub> production of **g-CN** with COFs.



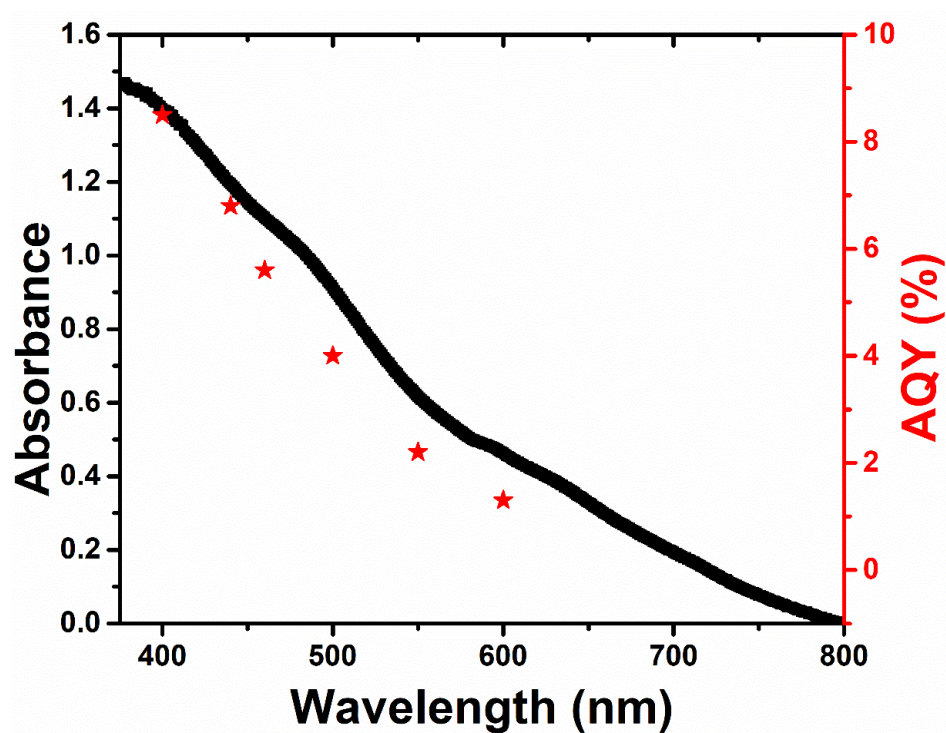

Figure S46. Wavelength dependent ACQ measurement for **DMCR-1**.

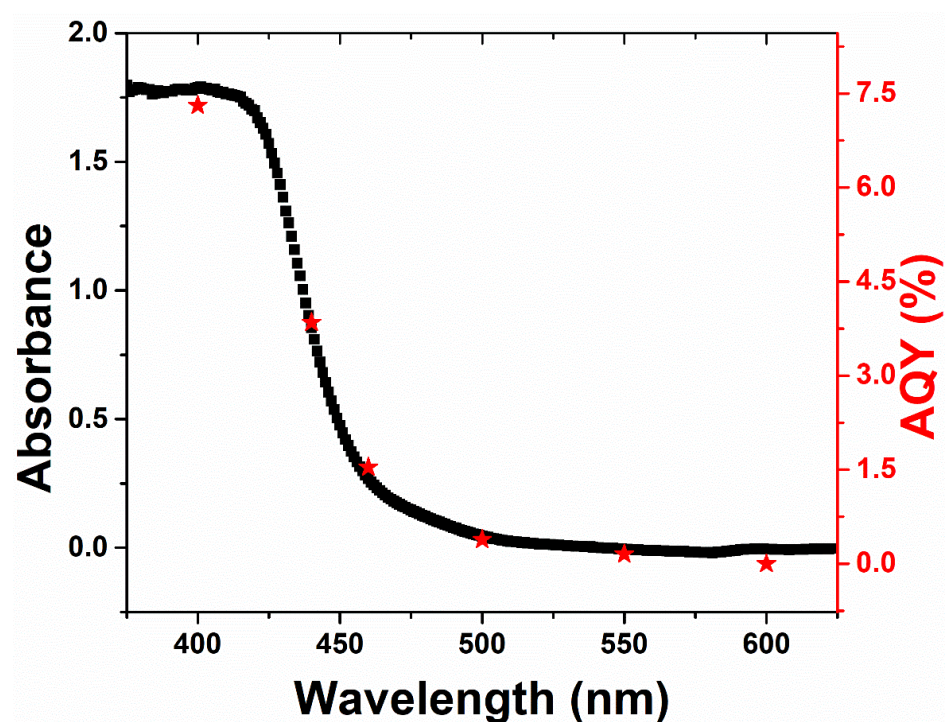

Figure S47. Wavelength dependent ACQ measurement for **Imine-1**.

PD-H2O2  
1H - 200MHz C17

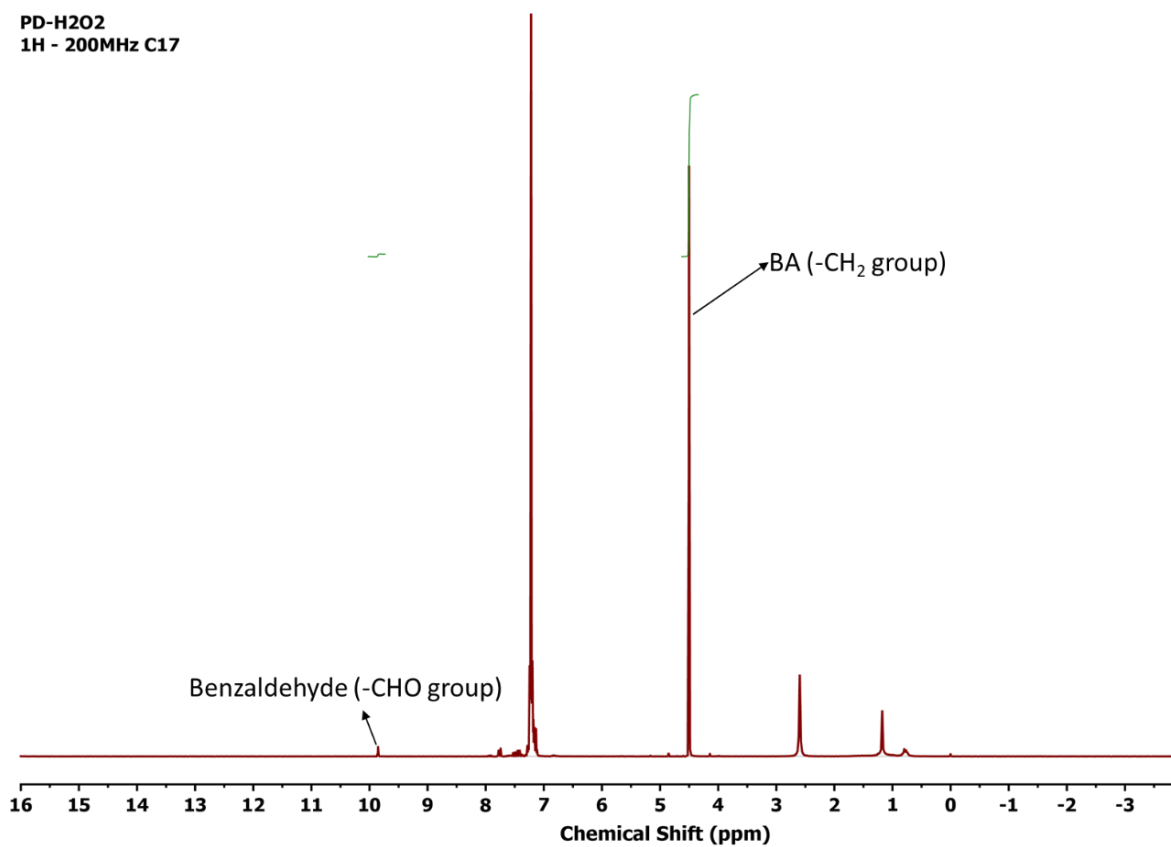

**Figure S48.** Formation of benzaldehyde after using BA as a sacrificial agent after long-term experiment in water/BA (10:1) system.



## Recyclability Test

Each COF powder (10 mg) in 20:2 water:IPA (22 mL), was taken and then ultrasonicated for 10-15 min (to disperse the COF) after being capped under O<sub>2</sub> (10 min). After 2 h, 0.2 mL solution was taken with a syringe equipped with a syringe filter. The amount of H<sub>2</sub>O<sub>2</sub> produced was analysed with Peroxide test sticks. After every catalytic experiment, COFs were regenerated by simply washing with acetone and MeOH. Once regenerated by filtration and drying, the COF samples could be reused to produced H<sub>2</sub>O<sub>2</sub> for at least five cycles.

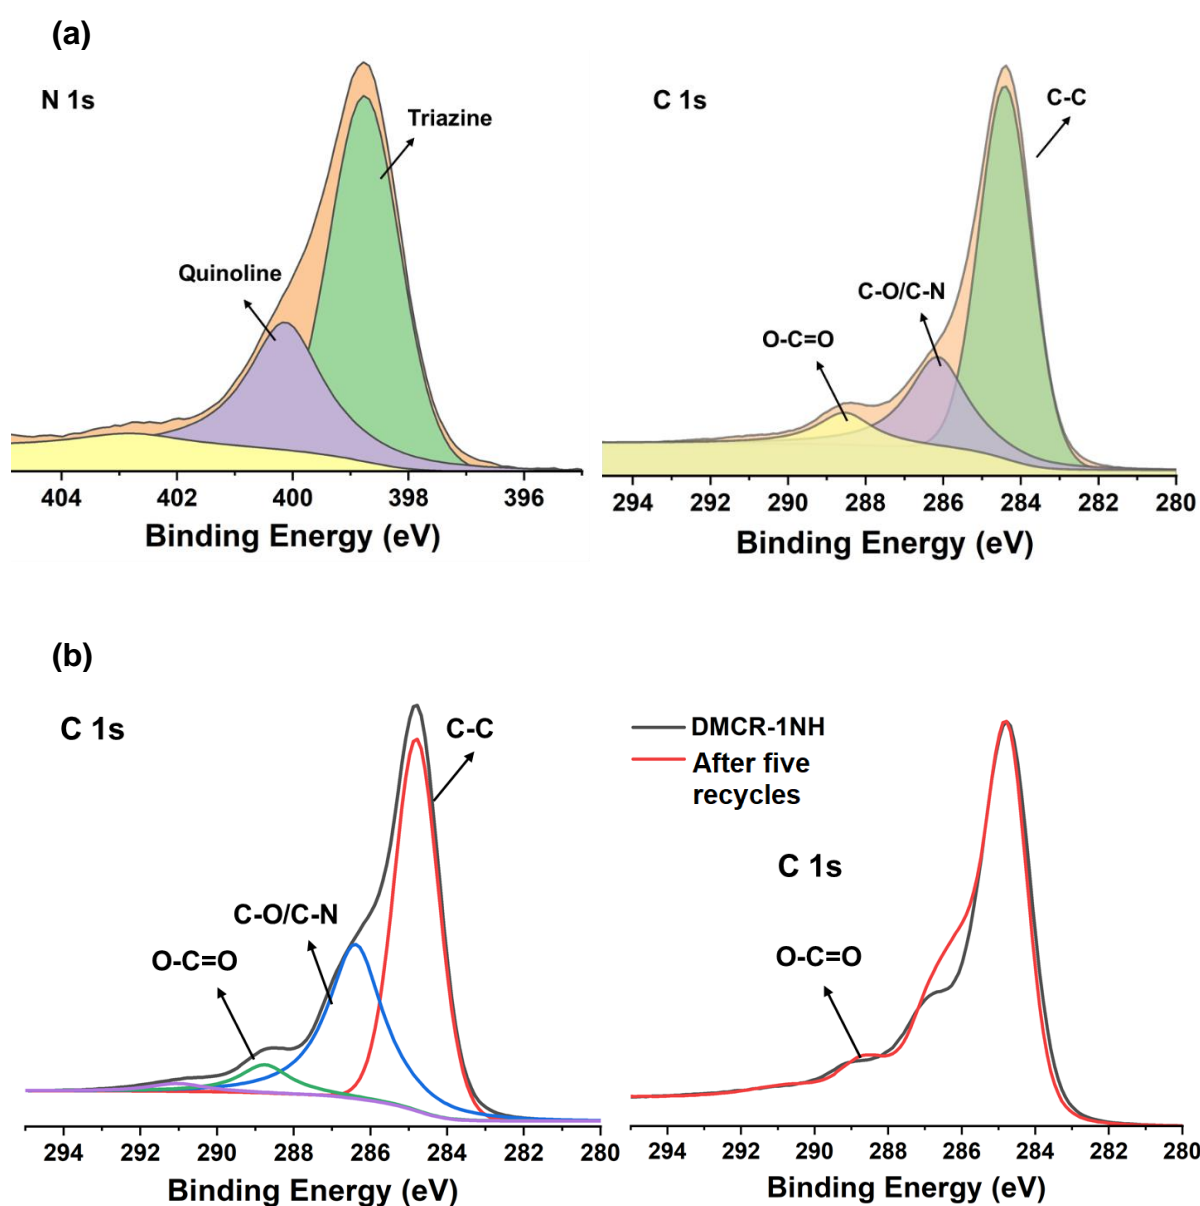

(c)

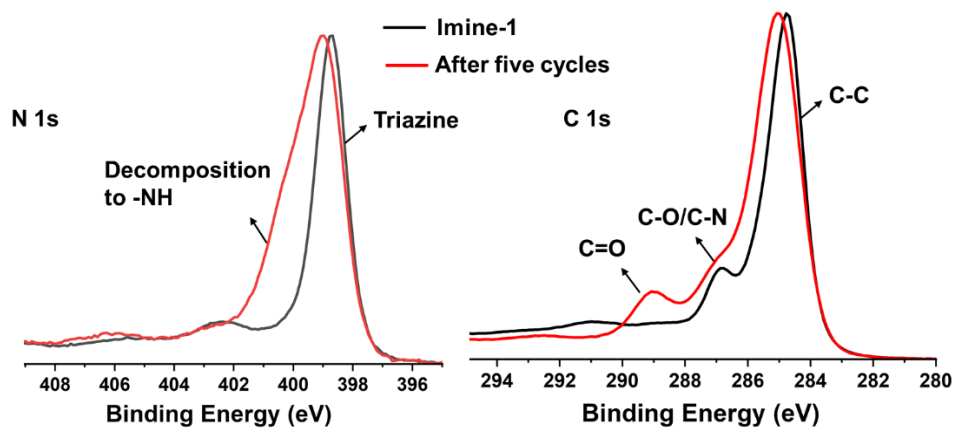

(d)

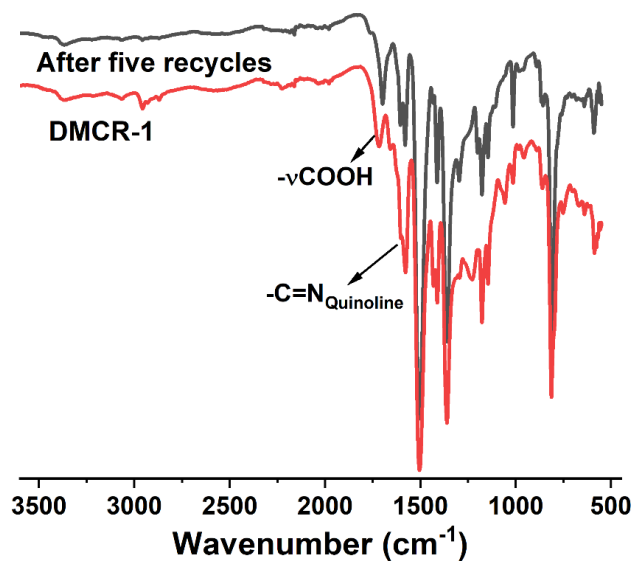

(e)

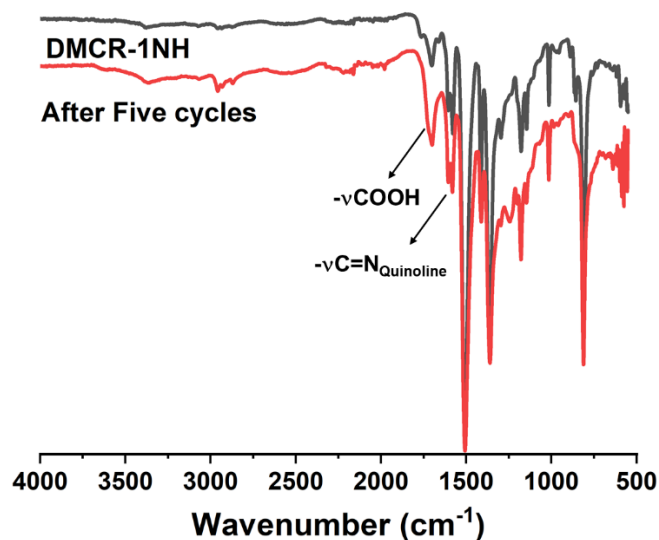

**Figure S49.** (a) N 1s and C 1s XPS of **DMCR-1**; (b) C 1s XPS of **DMCR-1NH**; (c) N 1s and C 1s XPS of **Imine-1** and FTIR spectra of (c) **DMCR-1** and (d) **DMCR-1NH** after 5 cycles.

## Section 10. Synthesis and Characterization of DMCR-2 and DMCR-3

### Synthesis of DMCR-2

A Pyrex glass tube (15 mL) was charged with 2,4,6-Tris(4-aminophenyl)triazine (Tta) (53.2 mg, 0.15 mmol), 1,3,5-Tris(4-formylphenyl)benzene (Tpa-CHO) (58.6 mg, 0.15 mmol), pyruvic acid (PA) (0.60 mmol, 60  $\mu$ L), (DDQ) (10 mg, 0.04 mmol), 1.5 mL *o*-DCB and 1.5 mL *n*-BuOH. The tube was first sonicated for 30 minutes to form bulk solid and then flash frozen at 77 K (liquid N<sub>2</sub> bath) and degassed by three freeze-pump-thaw cycles. The internal pressure was evacuated to 10<sup>-3</sup> mbar. The tube was sealed and heated at 120 °C for 3 days. The greenish brown precipitate was washed with acetone/MeOH several times and collected by filtration. Finally, the powder was dried in a normal oven at 80 °C. Yield = 89.7% (93 mg). Anal. Calcd (%): C, 76.5.; H, 3.38.; N, 9.39. Found (%): C, 76.21.; H, 3.18.; N, 9.90.

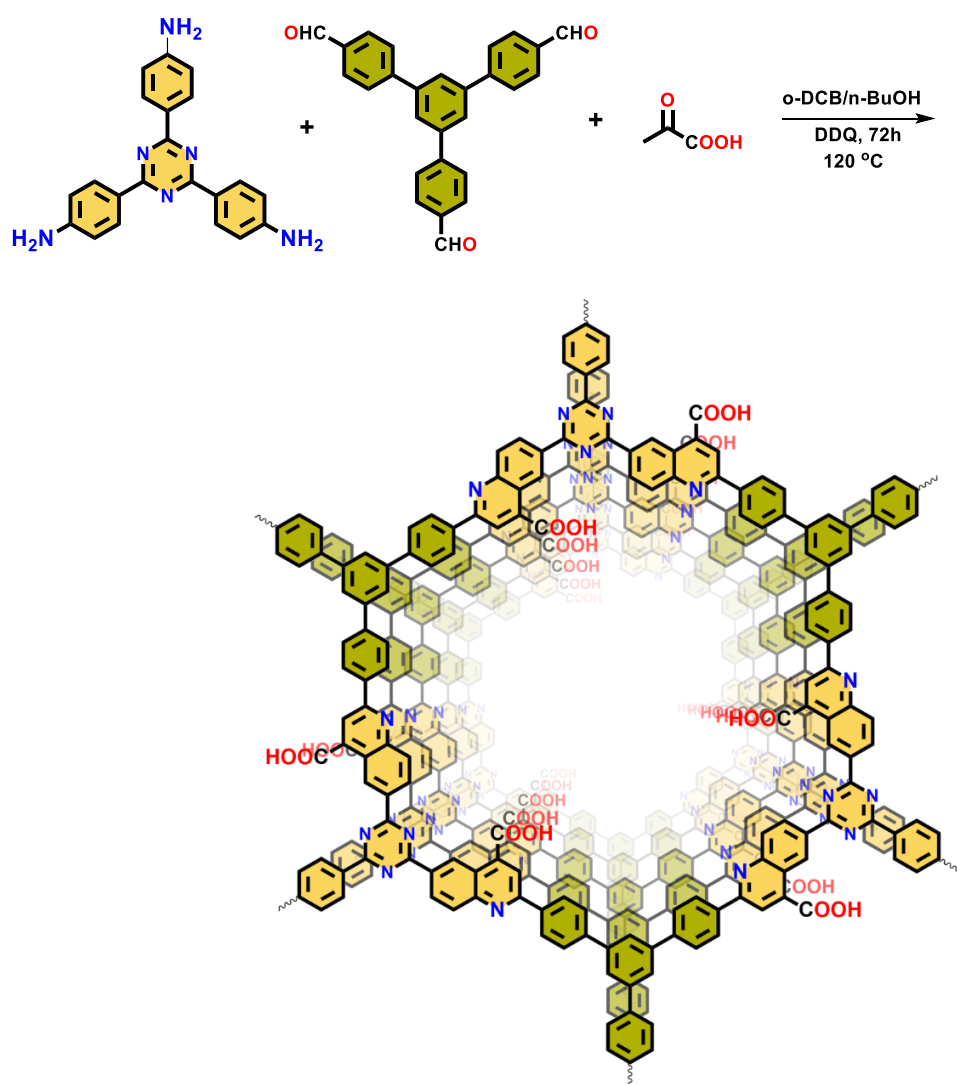

**Scheme S5.** Synthesis of **DMCR-2**.

### Synthesis of DMCR-3

A Pyrex glass tube (15 mL) was charged with 2,4,6-Tris(4-aminophenyl)benzene (53.2 mg, 0.15 mmol), 1,3,5-Tris(4-formylphenyl)benzene (Tpa-CHO) (58.6 mg, 0.15 mmol), pyruvic acid (PA) (0.60 mmol, 60  $\mu$ L), DDQ (10 mg, 0.04 mmol), 1.5 mL *o*-DCB and 1.5 mL *n*-BuOH. The tube was first sonicated for 30 minutes to form bulk solid and then flash frozen at 77 K (liquid N<sub>2</sub> bath) and degassed by three freeze-pump-thaw cycles. The internal pressure was evacuated to 10<sup>-3</sup> mbar. The tube was sealed and heated at 120 °C for 3 days. The brown precipitate was washed with acetone/MeOH several times and collected by filtration. Finally, the powder was dried in a normal oven at 80 °C. Yield = 82% (78 mg). Anal. Calcd. (%): C, 80.8.; H, 3.73.; N, 4.71. Found (%): C, 79.89.; H, 4.32.; N, 4.35.

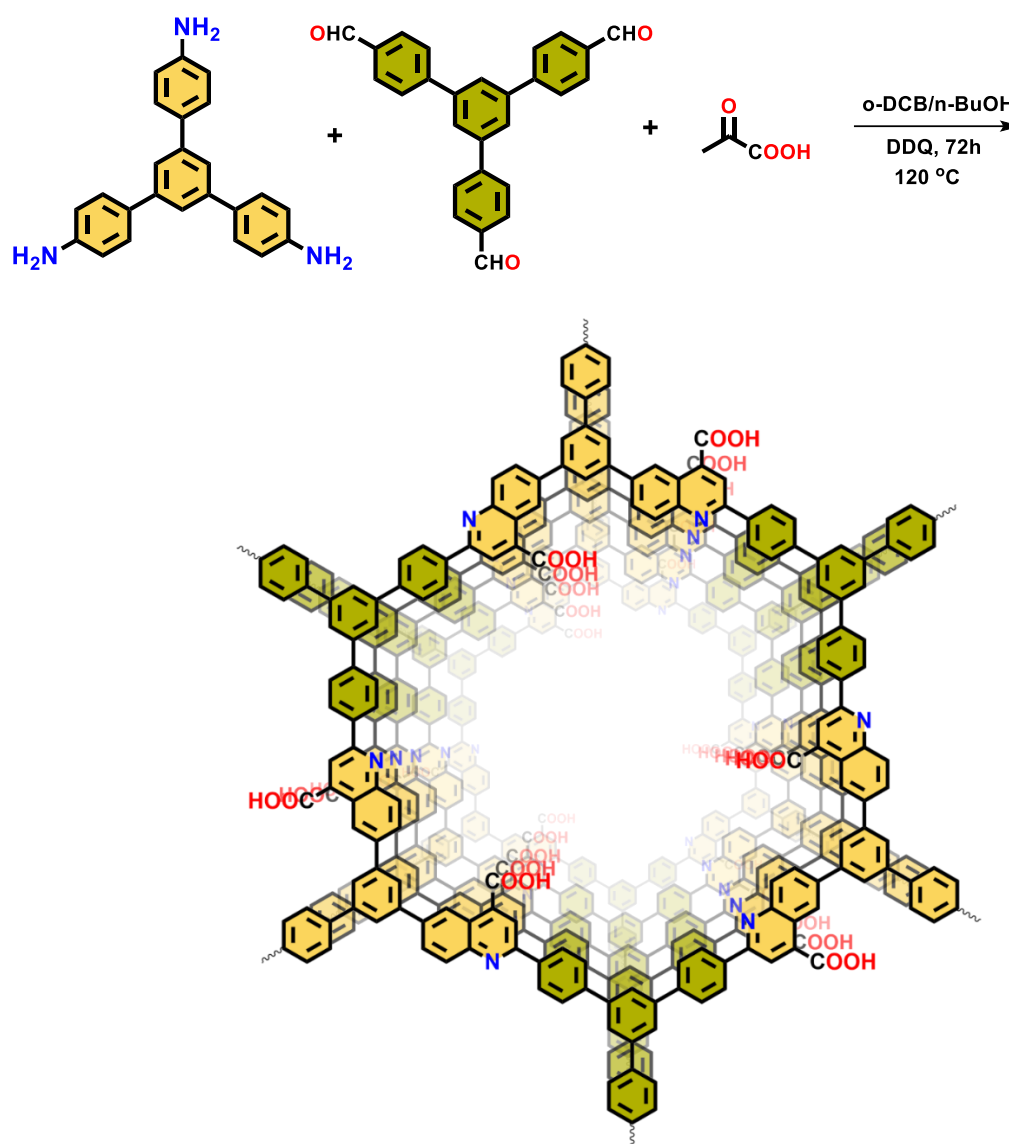

**Scheme S6.** Synthesis of **DMCR-3**.

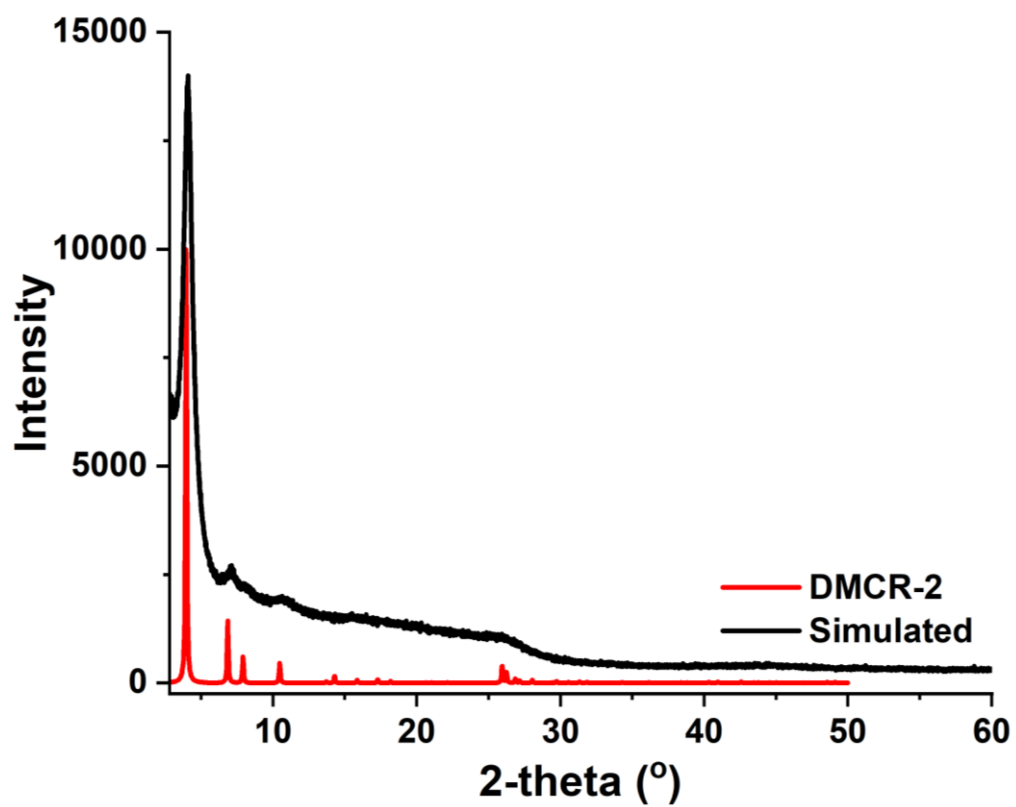

**Figure S50.** Simulated and experimental PXRD patterns of **DMCR-2**.

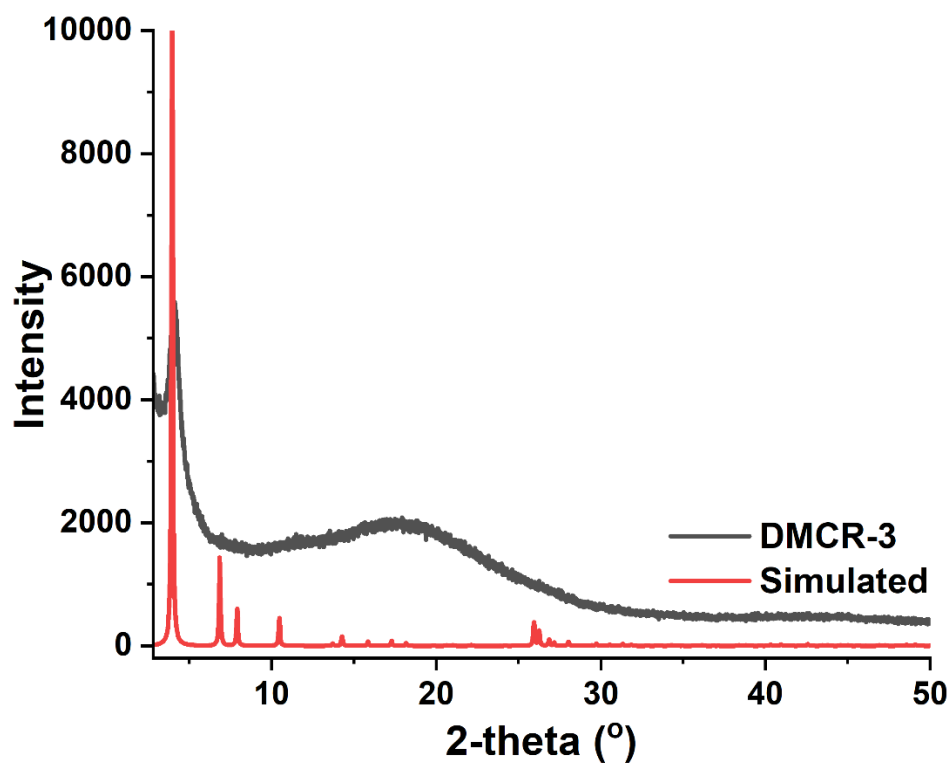

**Figure S51.** Simulated and experimental PXRD patterns of **DMCR-3**.

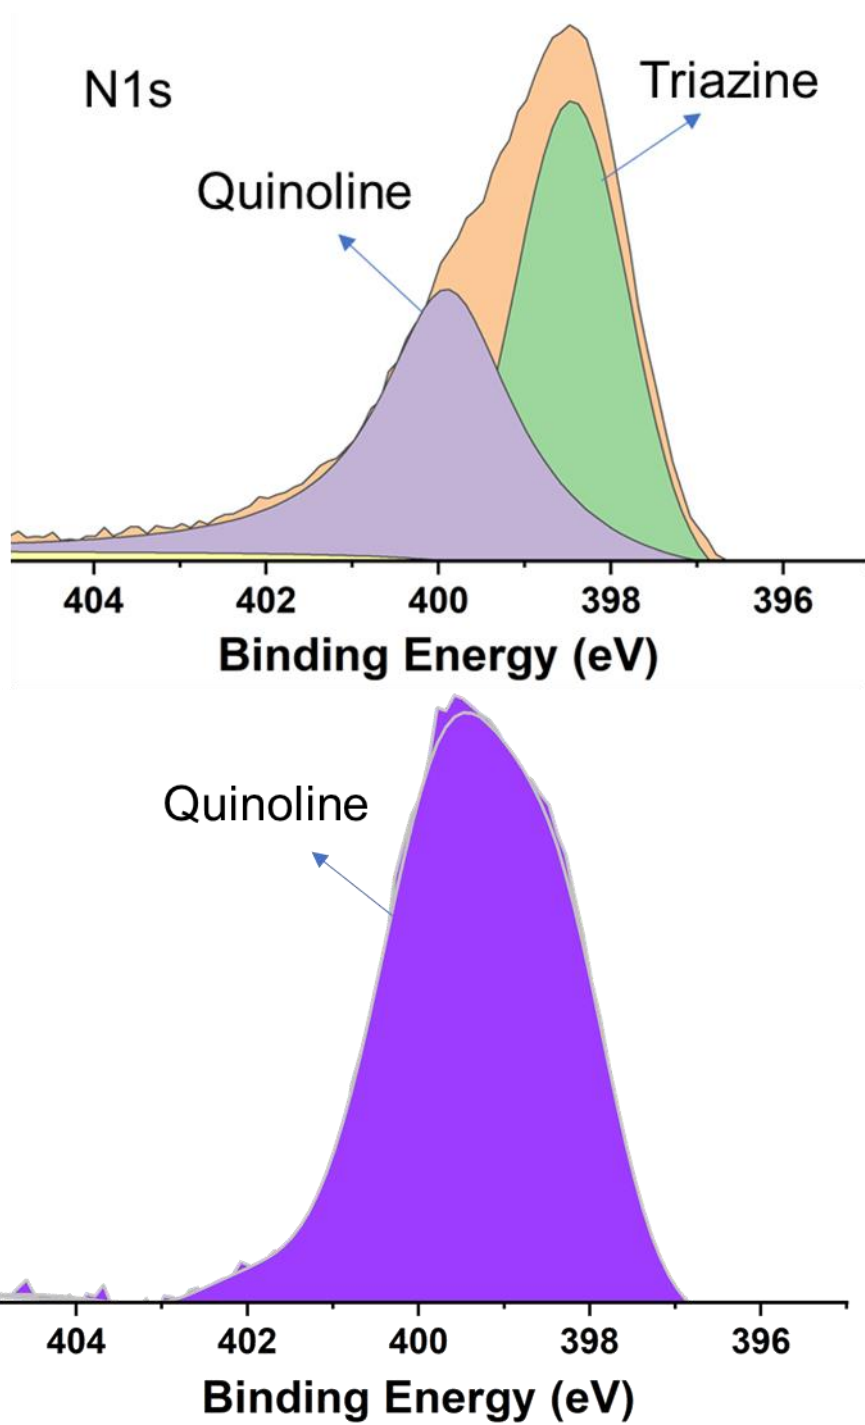

**Figure S52.** N(1s) XPS spectra of **DMCR-2** (Top) and **DMCR-3** (Bottom).

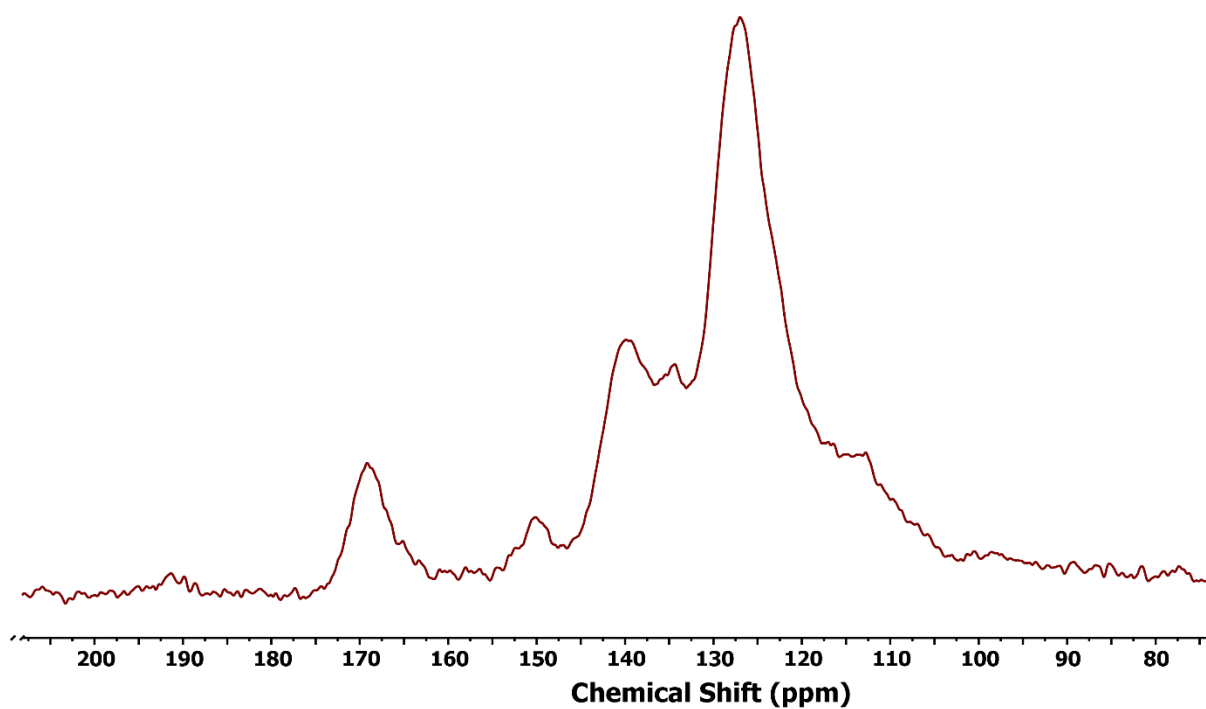

**Figure S53.**  $^{13}\text{C}$  CP MAS NMR spectrum of **DMCR-2**.

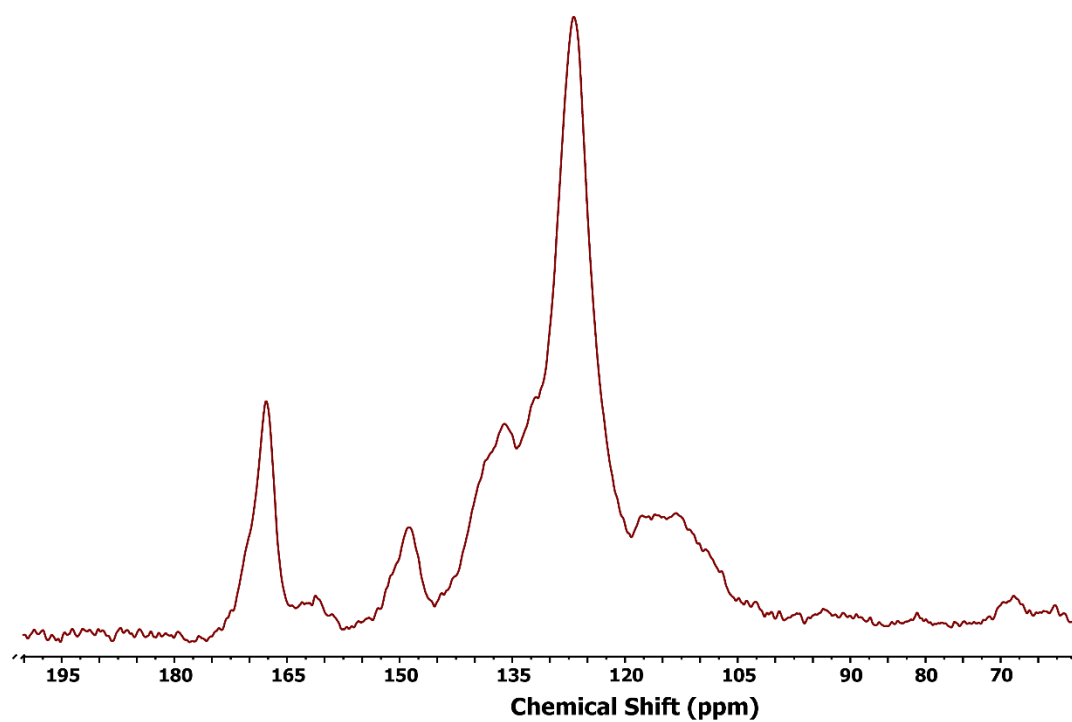

**Figure S54.**  $^{13}\text{C}$  CP MAS NMR spectrum of **DMCR-3**.



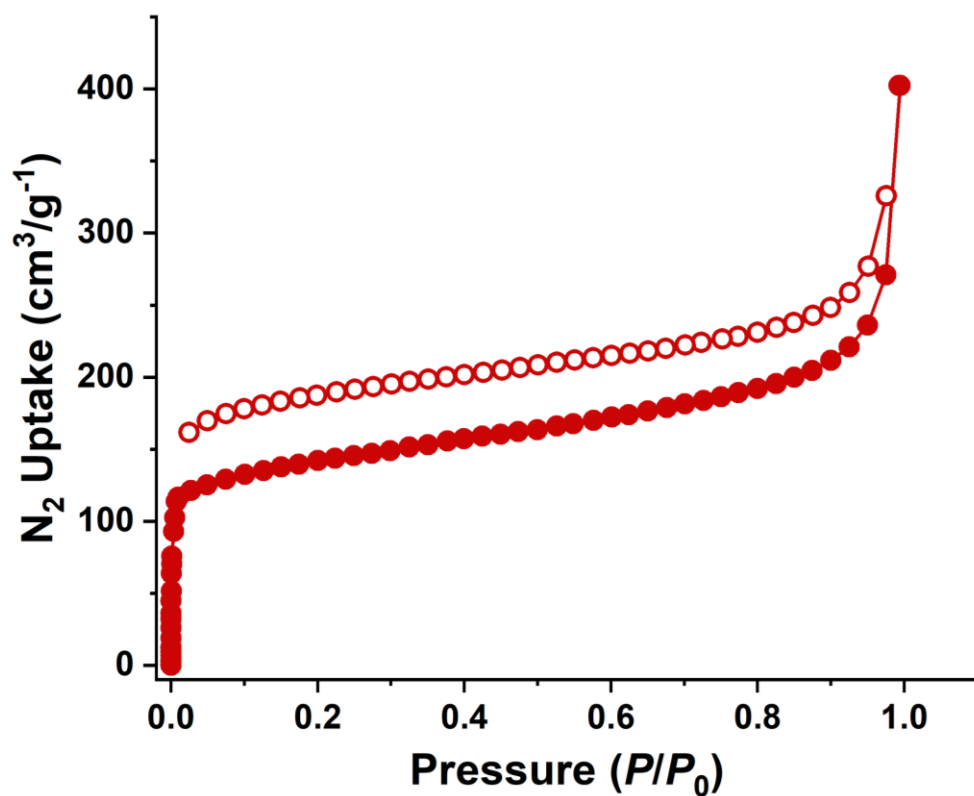

**Figure S55.** N<sub>2</sub> sorption isotherm of **DMCR-2** collected at 77 K with BET surface area 426 m<sup>2</sup> g<sup>-1</sup>.

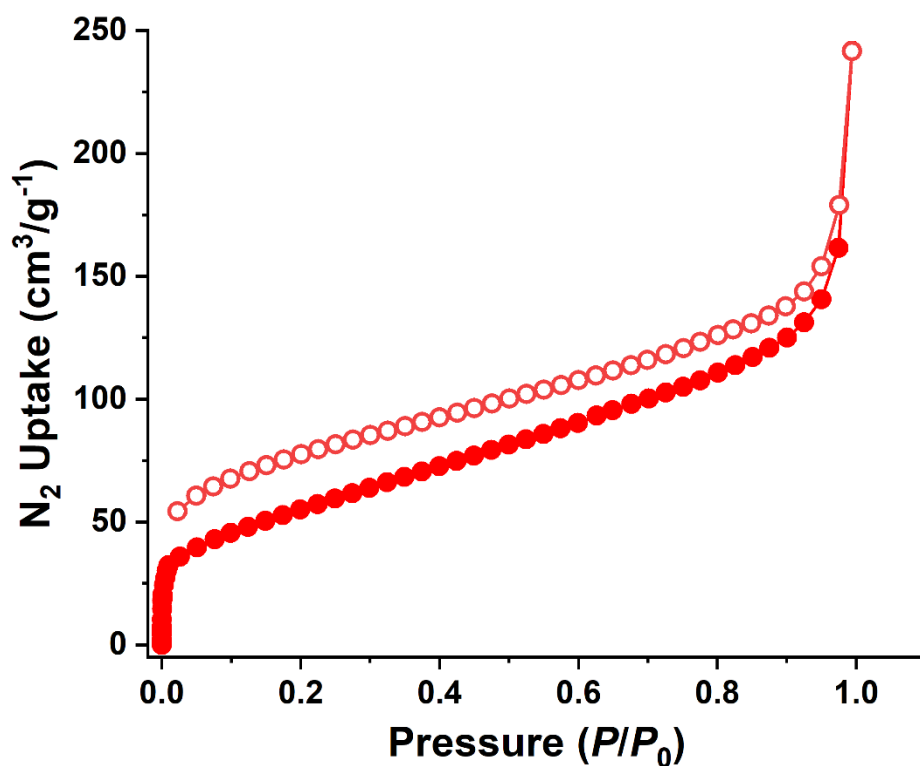

**Figure S56.** N<sub>2</sub> sorption isotherm of **DMCR-3** collected at 77 K with BET surface area 203 m<sup>2</sup> g<sup>-1</sup>.

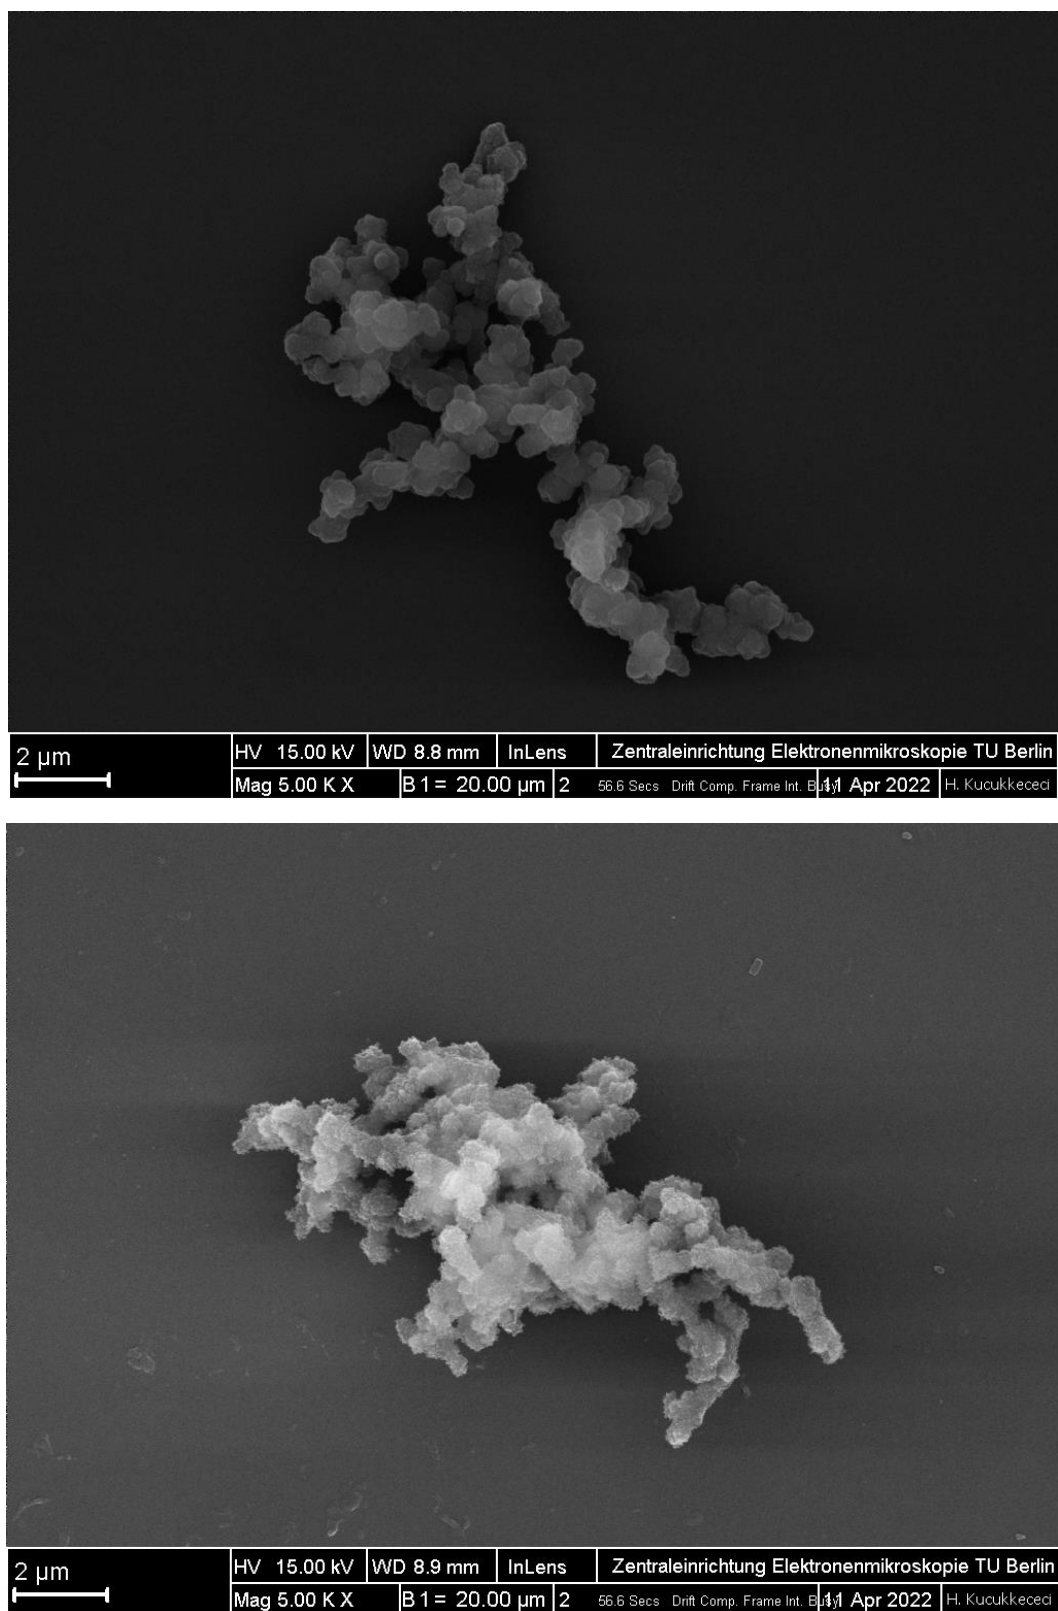

**Figure S57.** FESEM image of **DMCR-2** (top) and **DMCR-3** (bottom).

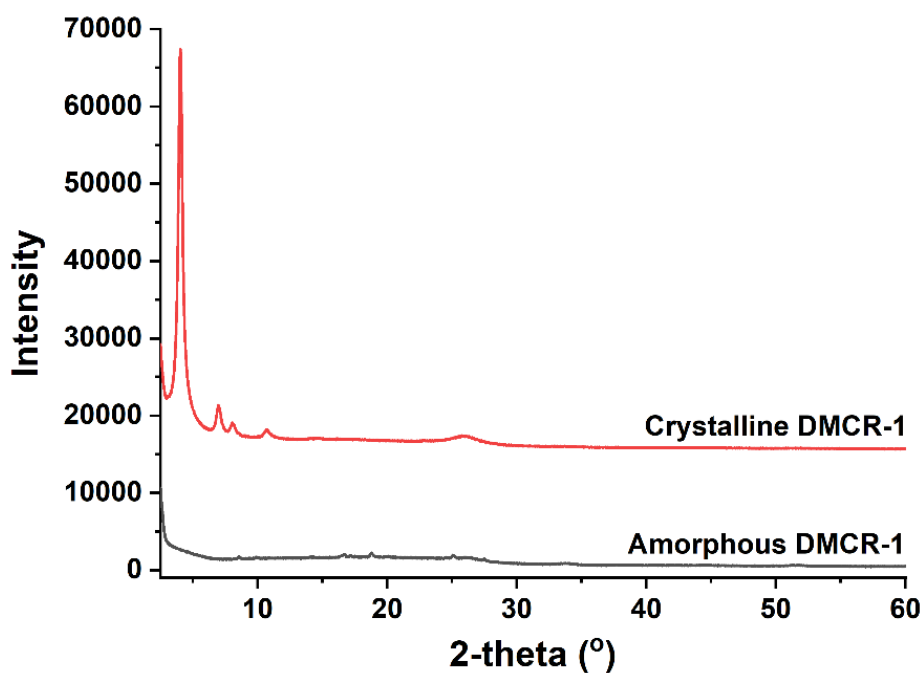

**Figure S58.** PXRD pattern of **amorphous DMCR-1** compared to PXRD pattern of **DMCR-1**.

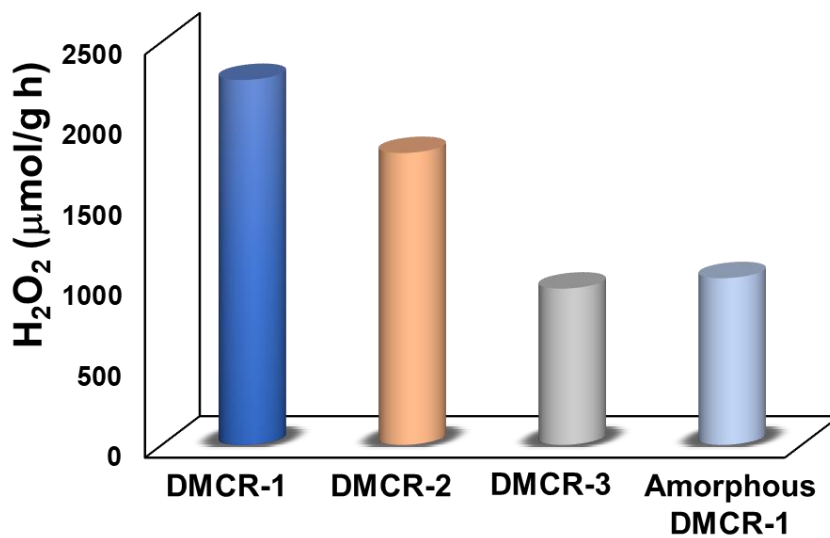

**Figure S59.** Comparison of  $H_2O_2$  production after 1 h (5 mg of COFs in 10 mL water and 1 mL IPA, 1 h at 25 °C and  $\lambda = >420$  nm).

## Section 11: Comparison of H<sub>2</sub>O<sub>2</sub> Production

**Table S5.** Comparison of H<sub>2</sub>O<sub>2</sub> production for different materials.

| Samples                                 | H <sub>2</sub> O <sub>2</sub> Production (μmol/h.g) | Irradiation Conditions               | Solvent mixture    | AQY (%) | Reference        |
|-----------------------------------------|-----------------------------------------------------|--------------------------------------|--------------------|---------|------------------|
| DMCR-1                                  | 2264                                                | $\lambda = 420\text{-}700\text{ nm}$ | Water:IPA (10:1)   | 8.8     | <b>This work</b> |
| DMCR-1NH                                | 2588                                                |                                      | Water:IPA (10:1)   | 10.2    |                  |
| DMCR-2                                  | 1811                                                |                                      | Water:IPA (10:1)   |         |                  |
| DMCR-3                                  | 970                                                 |                                      | Water:IPA (10:1)   |         |                  |
| Imine-1                                 | 1617                                                |                                      | Water:IPA (10:1)   | 7.2     |                  |
| DMCR-1NH                                | 1941                                                | Sunlight                             | Water:BA (10:1)    |         |                  |
| DMCR-1NH                                | 1319                                                |                                      | Seawater:BA (10:1) |         |                  |
| SonoCOF-F2                              | 197 (24 h)                                          | $\lambda = > 420\text{ nm}$          | Water              | 4.8     | S4               |
| EBA-COF                                 | 1820                                                | $\lambda = 420\text{ nm}$            | Water:EtOH (9:1)   |         | S5               |
|                                         | 1820                                                |                                      | Water:IPA (9:1)    |         |                  |
|                                         | 2550                                                |                                      | Water:BA (9:1)     |         |                  |
| BTEA-COF                                | 780                                                 | $\lambda = 420\text{ nm}$            | Water:EtOH (9:1)   |         |                  |
| TAPD-(Me) <sub>2</sub> COF              | 97                                                  | $\lambda = 420\text{-}700\text{ nm}$ | Water:EtOH (9:1)   |         | S6               |
| TAPD-(OMe) <sub>2</sub> COF             | 91                                                  | $\lambda = 420\text{-}700\text{ nm}$ | Water:EtOH (9:1)   |         |                  |
| DE7-M                                   | 266 (24h)                                           | $\lambda = > 420\text{ nm}$          | Water              | 8.7     | S7               |
| CTF-BDDBN                               | 96.7                                                | $\lambda = 420\text{-}700\text{ nm}$ | Water              |         | S8               |
| CTF-EDDBN                               | 56.7                                                | $\lambda = 420\text{-}700\text{ nm}$ | Water              |         |                  |
| CTF-BPDCN                               | 28.3                                                | $\lambda = 420\text{-}700\text{ nm}$ | Water              |         |                  |
| OCN-500                                 | 106                                                 | $\lambda = > 420\text{ nm}$          | Water              | 10.2    | S9               |
| COF-TfyBpy                              | 1042                                                | $\lambda = 420\text{-}700\text{ nm}$ | Water              |         | S10              |
| g-C <sub>3</sub> N <sub>4</sub>         | 63                                                  | $\lambda = > 420\text{ nm}$          | Water:EtOH (9:1)   |         | S11              |
| PEI/C <sub>3</sub> N <sub>4</sub>       | 4.2                                                 | $\lambda = > 420\text{ nm}$          | Water              | 2.21    | S12              |
| PC-HM(g-C <sub>3</sub> N <sub>4</sub> ) | 268                                                 | $\lambda = > 420\text{ nm}$          | Water:BA (1:1)     |         | S13              |
| Sb-SAPC15                               | 470.5 (8h)                                          | $\lambda = > 420\text{ nm}$          | water              | 17.6    | S14              |

|              |      |                              |                  |     |     |
|--------------|------|------------------------------|------------------|-----|-----|
| CoPC-BTM-COF | 2096 | $\lambda = > 400 \text{ nm}$ | Water:EtOH (9:1) | 7.2 | S15 |
| CoPC-DAB-COF | 1815 | $\lambda = > 400 \text{ nm}$ | Water:EtOH (9:1) | 5.2 |     |

## References:

(S1) Zhang, Y.; Položij M.; Heine T. Statistical Representation of Stacking Disorder in Layered Covalent Organic Frameworks, *Chem. Mater.* **2022**, *34*, 2376-2381.

(S2) Rouquerol, J.; Rouquerol, F.; Llewellyn, P.; Maurin, G.; Sing, K. S. W.; *Adsorption by Powders and Porous Solids (Second Edition)*. Academic Press, Oxford: 2014.

(S3) Osterrieth, J. W. M.; Rampersad J.; Madden, D.; Rampal, N.; Skoric, L.; Connolly B.; Allendorf, M. D.; Stavila, V.; Snider, J. L.; Ameloot, R.; Marreiros, J.; Ania, C.; Azevedo, D.; Vilarrasa-Garcia, E.; Santos, B. F.; Bu X.-H.; Chang, Z.; Bunzen H.; Champness, N. R.; Griffin, S. L.; Chen, B.; Lin, R.-B.; Coasne, B.; Cohen, S.; Moreton, J. C.; Colón, Y. J.; Chen, L.; Clowes, R.; Coudert, F.-X.; Cui Y.; Hou, B.; D'Alessandro, D. M.; Doheny, P. W.; Dincă, M.; Sun C.; Doonan, C.; Huxley, M. T.; Evans, J. D.; Falcaro P.; Ricco R.; Farh,a O.; Idrees, K. B.; Islamoglu, T.; Feng P.; Yang, H.; Forgan, R. S.; Bara, D.; Furukawa, S.; Sanchez, E.; Gascon, J.; Telalović S.; Ghosh, S. K.; Mukherjee, S.; Hill, M. R.; Sadiq, M. M.; Horcajada, P.; Salcedo-Abraira, P.; Kaneko, K.; Kukobat R.; Kenvin, J.; Keskin, S.; Kitagawa, S.; Otake K.-i.; Lively, R. P.; DeWitt, S. J. A.; Llewellyn, P.; Lotsch, B. V.; Emmerling, S. T.; Pütz A. M.; Martí-Gastaldo C.; Padial, N. M.; García-Martínez J.; Linares, N.; MasPOCH, D.; Suárez del Pino, J. A.; Moghadam, P.; Oktavian, R.; Morris, R. E.; Wheatley, P. S.; Navarro, J.; Petit, C.; Danaci, D.; Rosseinsky, M. J.; Katsoulidis, A. P.; Schröder, M.; Han, X.; Yang, S.; Serre, C.; Mouchaham, G.; Sholl, D. S.; Thyagarajan, R.; Siderius, D.; Snurr, R. Q.; Goncalves, R. B.; Telfer, S.; Lee, S. J.; Ting, V. P.; Rowlandson, J. L.; Uemura, T.; Iiyuka, T. How Reproducible are Surface Areas Calculated from the BET Equation? *Adv. Mater.* **2022**, *34*, 2201502.

(S4) Zhao, W.; Yan, P.; Li, B.; Bahri, M.; Liu, L.; Zhou, X.; Clowes, R.; Browning, N. D.; Wu, Y.; Ward, J. W.; Cooper, A. I. Accelerated Synthesis and Discovery of Covalent Organic Framework Photocatalysts for Hydrogen Peroxide Production. *J. Am. Chem. Soc.* **2022**, *144*, 9902–9909.

(S5) Zhai, L.; Xie, Z.; Cui, C.-X.; Yang, X.; Xu, Q.; Ke, X.; Liu, M.; Qu, L.-B.; Chen, X.; Mi, L. Constructing Synergistic Triazine and Acetylene Cores in Fully Conjugated Covalent Organic Frameworks for Cascade Photocatalytic H<sub>2</sub>O<sub>2</sub> Production. *Chem. Mater.* **2022**, *34*, 5232–5240.

(S6) Krishnaraj, C.; Jena, H. S.; Bourda, L.; Laemont, A.; Pachfule, P.; Roeser, J.; Chandran, C. V.; Borgmans, S.; Rogge, S. M. J.; Leus, K.; Stevens, C. V.; Martens, J. A.; Speybroeck, V. V.; Breynaert, E.; Thomas, A.; Voort, P. V. D. Strongly Reducing

(Diarylamino)benzene-Based Covalent Organic Framework for Metal-Free Visible Light Photocatalytic H<sub>2</sub>O<sub>2</sub> Generation. *J. Am. Chem. Soc.* **2020**, *142*, 20107–20116.

(S7) Liu, L.; Gao, M.; Yang, H.; Wang, X.; Li, X.; Cooper, A. I. Linear Conjugated Polymers for Solar-Driven Hydrogen Peroxide Production: The Importance of Catalyst Stability. *J. Am. Chem. Soc.* **2021**, *143*, 19287-19293.

(S8) Chen, L.; Wang, L.; Wan, Y.; Zhang, Y.; Qi, Z.; Wu, X.; Xu, H. Acetylene and Diacetylene Functionalized Covalent Triazine Frameworks as Metal-Free Photocatalysts for Hydrogen Peroxide Production: A New Two-Electron Water Oxidation Pathway. *Adv. Mater.* **2020**, *32*, 1904433.

(S9) Wei, Z.; Liu, M.; Zhang, Z.; Yao, W.; Tan, H.; Zhu, Y. Efficient Visible-Light-Driven Selective Oxygen Reduction to Hydrogen Peroxide by Oxygen-Enriched Graphitic Carbon Nitride Polymers. *Energy Environ. Sci.* **2018**, *11*, 2581-2589.

(S10) Kou, M.; Wang, Y.; Xu, Y.; Ye, L.; Huang, Y.; Jia, B.; Li, H.; Ren, J.; Deng, Y.; Chen, J.; Zhou, Y.; Lei, K.; Wang, L.; Liu, W.; Huang, H.; Ma, T. Molecularly Engineered Covalent Organic Frameworks for Hydrogen Peroxide Photosynthesis. *Angew Chem., Int. Ed.* **2022**, *61*, e202200413.

(S11) Shiraishi, Y.; Kanazawa, S.; Sugano, Y.; Tsukamoto, D.; Sakamoto, H.; Ichikawa, S.; Hirai, T. Highly Selective Production of Hydrogen Peroxide on Graphitic Carbon Nitride (g-C<sub>3</sub>N<sub>4</sub>) Photocatalyst Activated by Visible Light. *ACS Catal.* **2014**, *4*, 774-780.

(S12) Zeng, X.; Liu, Y.; Kang, Y.; Li, Q.; Xia, Y.; Zhu, Y.; Hou, H.; Uddin, M. H.; Gengenbach, T. R.; Xia, D. et al. Simultaneously Tuning Charge Separation and Oxygen Reduction Pathway on Graphitic Carbon Nitride by Polyethylenimine for Boosted Photocatalytic Hydrogen Peroxide Production. *ACS Catal.* **2020**, *10*, 3697-3706.

(S13) Ou, H.; Tang, C.; Chen, X.; Zhou, M.; Wang, X. Solvated Electrons for Photochemistry Syntheses Using Conjugated Carbon Nitride Polymers. *ACS Catal.* **2019**, *9*, 2949-2955.

(S14) Teng, Z.; Zhang, Q.; Yang, H.; Kato, K.; Yang, W.; Lu, Y.; Liu, S.; Wang, C.; Yamakata, A.; Su, C. et al. Atomically Dispersed Antimony on Carbon Nitride for the Artificial Photosynthesis of Hydrogen Peroxide. *Nat. Catal.* **2021**, *4*, 374-384.

(S15) Zhi, Q.; Liu, W.; Jiang, R.; Zhan, X.; Jin, Y.; Chen, X.; Yang, X.; Wang, K.; Cao, W.; Qi, D.; Jiang, J. Piperazine-Linked Metalphthalocyanine Frameworks for Highly Efficient Visible-Light-Driven H<sub>2</sub>O<sub>2</sub> Photosynthesis. *J. Am. Chem. Soc.* **2022**, *144*, 21328-21336.
